# Supplementary material
Source: PubMed Central journal article supplement (PMC4957953)
Supplement: NIHMS769585-supplement.pdf [file NIHMS769585-supplement.pdf]

**Efficient access to  $sp^3$ -rich tricyclic amine scaffolds through Diels-Alder  
reactions of azide-containing silyloxydienes**

Michael C McLeod and Jeffrey Aubé\*

Department of Medicinal Chemistry, Delbert M. Shankel Structural Biology Center, University of Kansas,  
2034 Becker Drive, Lawrence, Kansas 66045, United States

jaube@ku.edu

**Supporting Information**

**Table of Contents**

- 1. General experimental**
- 2. Experimental procedures for scaffold synthesis**
- 3. Experimental procedures for library synthesis**
- 4. Characterization of representative library compounds**
- 5. Cheminformatic details**
- 6. Copies of  $^1\text{H}$  and  $^{13}\text{C}$  spectra**

**Note:** For the convenience of the reader, the entire experimental details embodied in the paper are also included here.

## 1. General experimental

Unless stated, all solvents and reagents were used as supplied from commercial sources. Dichloromethane and tetrahydrofuran were dried by being passed through two packed columns of neutral ammonia using a commercial solvent purification system prior to use. Parallel library syntheses were performed on a Bohdan Miniblock XT parallel solution phase synthesizer obtained from Mettler-Toledo Auto Chem. Parallel evaporation was performed on a GeneVac EZ-2 plus evaporation system. Purification of the libraries was performed by mass-directed fractionalization: the HPLC analysis was carried out using a Waters Acquity system with UV and mass detection with a linear gradient of 5% acetonitrile in pH 9.8 buffered aqueous  $\text{NH}_4\text{HCO}_2$  to 100% MeCN at a flow rate of 0.6 mL/min. Preparative reverse-phase purification was carried out using a Waters 2767 preparative system with UV detection (Waters 2996 PAD) and mass detection (Waters Micromass ZQ) with a Waters X-Bridge C18 column (19 x 150 mm, with 19 x 10 mm guard column) eluting with a water (or pH 9.8 aqueous  $\text{NH}_4\text{OH}$ )/acetonitrile gradient with a flow rate of 20 mL/min, and sample dilution in DMSO. Flash chromatography was performed using Sorbent Technologies standard grade silica gel (40-63  $\mu\text{m}$  particle size, 230 Å 400 mesh). Automated column chromatography was performed on a Teledyne CombiFlashRf system with pre-packed RediSepRf columns for normal phase, and RediSepRf C18 high performance Gold columns for reverse phase separations. Infrared spectra were acquired on a PerkinElmer Spectrum 100 FT-IR spectrophotometer. NMR spectra were recorded at the frequencies stated using a Bruker AM 400 or Bruker 500 MHz AVIII with  $^{13}\text{C}$ -observe cryogenically-cooled probe spectrometer. Chemical shifts were referenced to  $\delta$  7.26 and 77.0 ppm from chloroform for  $^1\text{H}$  and  $^{13}\text{C}$  respectively. The multiplicities of  $^1\text{H}$  signals are designated by the following abbreviations: s = singlet; d = doublet; t = triplet; m = multiplet; br = broad. All  $^{13}\text{C}$  NMR spectra were acquired using broadband decoupled mode and assignments were determined using DEPT sequences. Mass spectra were obtained by electrospray ionization in positive ion mode.

## 2. Experimental procedures for scaffold synthesis

### Amine scaffolds 6a & S1

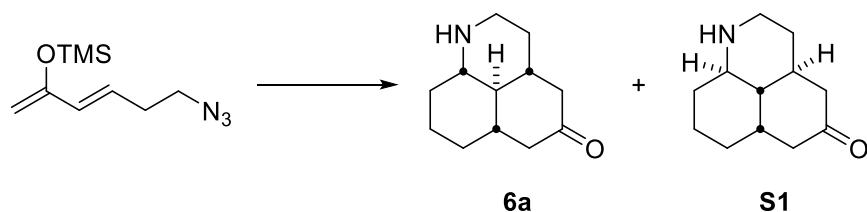

$\text{BF}_3 \cdot \text{OEt}_2$  (4.60 mL, 37.1 mmol) was added to a solution of cyclohexenone (3.60 mL, 37.1 mmol) in anhydrous  $\text{CH}_2\text{Cl}_2$  (300 mL) with 4Å MS (~8.5 g) at  $-78^\circ\text{C}$  under argon. The mixture was stirred at  $-78^\circ\text{C}$

for 5 min, then a solution of silyloxydiene **3a**<sup>1</sup> (11.8 g, 55.6 mmol) in CH<sub>2</sub>Cl<sub>2</sub> (50 mL) was added over 10 min. The reaction was allowed to warm from -78 °C to rt and stirred for 18 h. The reaction was quenched with H<sub>2</sub>O (200 mL) and extracted with CH<sub>2</sub>Cl<sub>2</sub> (3 x 100 mL). The combined organics were dried (Na<sub>2</sub>SO<sub>4</sub>) and concentrated to afford a brown oil. The crude product was purified by automated chromatography (2 x 40 g silica columns, 0 to 10% MeOH in CH<sub>2</sub>Cl<sub>2</sub> over 20 min). All of the fractions containing the correct mass were combined to afford an orange oil (4.00 g).

The diastereomeric mixture of above azides was dissolved in anhydrous THF (200 mL) and PPh<sub>3</sub> (8.90 g, 34.0 mmol) added. The reaction mixture was stirred at rt for 18 h, then 2M NaOH (50 mL) added and the mixture extracted with EtOAc (3 x 100 mL). The combined organics were dried (Na<sub>2</sub>SO<sub>4</sub>) and concentrated to afford a brown oil. The residue was dissolved in CH<sub>2</sub>Cl<sub>2</sub> (200 mL) and acetic acid (970 μL, 17.0 mmol) added, followed by sodium triacetoxyborohydride (7.20 g, 34.0 mmol). The reaction was stirred at rt for 18 h, then quenched with 2M NaOH (50 mL) and extracted with CH<sub>2</sub>Cl<sub>2</sub> (3 x 100 mL). The combined organics were dried (Na<sub>2</sub>SO<sub>4</sub>) and concentrated to afford a brown solid. The crude product was purified by chromatography (silica gel, 90:9:1 CH<sub>2</sub>Cl<sub>2</sub>:MeOH:NH<sub>4</sub>OH) to afford the title compound (800 mg, 7% from diene **3a**, inseparable mixture of diastereoisomers) as a brown oil.

#### Amines **9a{1}** & **S2**

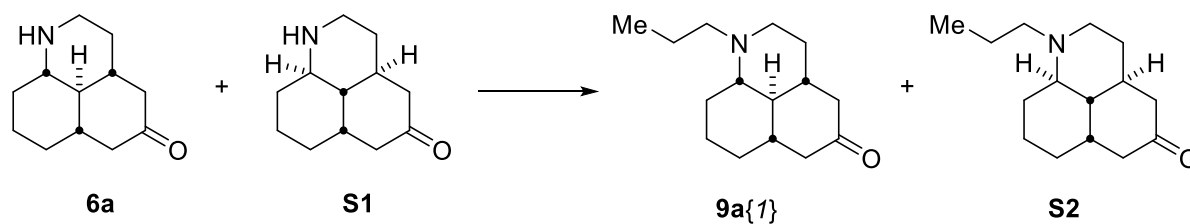

Propionaldehyde (450 μL, 6.21 mmol) was added to a solution of the diastereomeric mixture of amines **6a** and **S1** (800 mg, 4.14 mmol) in anhydrous CH<sub>2</sub>Cl<sub>2</sub> (30 mL) at rt under argon. Acetic acid (240 μL, 4.14 mmol) was then added, followed by sodium triacetoxyborohydride (1.75 g, 8.28 mmol). The reaction mixture was stirred at rt for 18 h, then quenched with 2 M NaOH (10 mL) and extracted with CH<sub>2</sub>Cl<sub>2</sub> (3 x 20 mL). The combined organics were dried (Na<sub>2</sub>SO<sub>4</sub>) and concentrated to afford a brown oil (850 mg). The crude product was purified by automated reverse-phase chromatography (50 g C18 column, 10% MeCN in basic H<sub>2</sub>O to 100% over 20 min), to afford **9a{1}** (286 mg, 29%) and **S2** (152 mg, 16%) as pale yellow solids.

**9a{1}**:  $\nu_{\max}$  (film)/cm<sup>-1</sup> 2926, 1711;  $\delta_{\text{H}}$  (500 MHz, CDCl<sub>3</sub>) 2.95 – 2.90 (m, 1H), 2.66 – 2.58 (m, 1H), 2.45 – 2.38 (m, 1H), 2.33 – 2.24 (m, 3H), 2.12 – 2.00 (m, 3H), 1.88 – 1.77 (m, 2H), 1.65 – 1.59 (m, 2H), 1.51 – 1.26 (m, 6H), 1.18 – 1.04 (m, 3H), 0.82 (t, *J* = 7.4 Hz, 3H);  $\delta_{\text{C}}$  (125 MHz, CDCl<sub>3</sub>) 210.2 (C), 63.8 (CH), 55.1 (CH<sub>2</sub>), 52.6 (CH<sub>2</sub>), 50.5 (CH), 48.5 (CH<sub>2</sub>), 48.4 (CH<sub>2</sub>), 41.01 (CH), 40.99 (CH), 33.8 (CH<sub>2</sub>), 33.3 (CH<sub>2</sub>), 30.0 (CH<sub>2</sub>), 24.5 (CH<sub>2</sub>), 17.5 (CH<sub>2</sub>), 12.0 (CH<sub>3</sub>); *m/z* (ESI<sup>+</sup>) found [M+H]<sup>+</sup> 236.2001. C<sub>15</sub>H<sub>26</sub>NO<sup>+</sup> requires 236.2009.

**S2:**  $\nu_{\text{max}}$  (film)/ $\text{cm}^{-1}$  2926, 1710;  $\delta_{\text{H}}$  (500 MHz,  $\text{CDCl}_3$ ) 2.96 – 2.90 (m, 1H), 2.60 – 2.53 (m, 2H), 2.49 – 2.37 (m, 2H), 2.28 – 2.21 (m, 2H), 2.19 – 1.99 (m, 5H), 1.75 – 1.64 (m, 2H), 1.62 – 1.50 (m, 2H), 1.48 – 1.24 (m, 5H), 1.14 (ddd,  $J = 16.5, 12.5, 4.0$  Hz, 1H), 0.85 (t,  $J = 7.4$  Hz, 3H);  $\delta_{\text{C}}$  (125 MHz,  $\text{CDCl}_3$ ) 211.5 (C), 59.2 (CH), 54.4 ( $\text{CH}_2$ ), 53.1 ( $\text{CH}_2$ ), 48.6 ( $\text{CH}_2$ ), 47.6 ( $\text{CH}_2$ ), 45.1 (CH), 39.1 (CH), 34.9 ( $\text{CH}_2$ ), 32.6 (CH), 29.7 ( $\text{CH}_2$ ), 28.1 ( $\text{CH}_2$ ), 19.8 ( $\text{CH}_2$ ), 17.1 ( $\text{CH}_2$ ), 12.0 ( $\text{CH}_3$ );  $m/z$  (ESI+) found  $[\text{M}+\text{H}]^+$  236.1999.  $\text{C}_{15}\text{H}_{26}\text{NO}^+$  requires 236.2009.

### Amine scaffold 6c

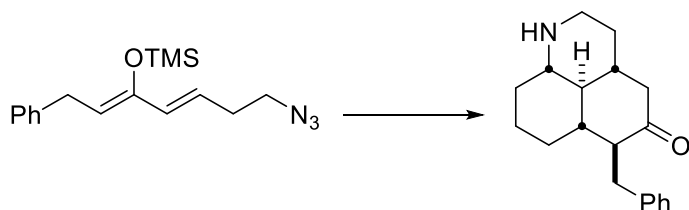

$\text{BF}_3 \cdot \text{OEt}_2$  (5.20 mL, 42.4 mmol) was added to a solution of cyclohexenone (4.10 mL, 42.4 mmol) in anhydrous  $\text{CH}_2\text{Cl}_2$  (350 mL) with 4Å MS (~20 g) at  $-78$  °C under argon. The mixture was stirred at  $-78$  °C for 5 min, then a solution of silyloxydiene **3c**<sup>1</sup> (17.9 g, 59.4 mmol) in  $\text{CH}_2\text{Cl}_2$  (50 mL) was added over 10 min. The reaction was allowed to warm from  $-78$  °C to rt and stirred for 18 h. The reaction was quenched with  $\text{H}_2\text{O}$  (200 mL) and extracted with  $\text{CH}_2\text{Cl}_2$  (3 x 100 mL). The combined organics were dried ( $\text{Na}_2\text{SO}_4$ ) and concentrated to afford a brown oil (19.5 g). The crude product was purified by automated chromatography (40 g silica column, 0 to 10% MeOH in  $\text{CH}_2\text{Cl}_2$  over 20 min). All of the fractions containing the correct mass were combined to afford an orange oil (6.60 g).

The diastereomeric mixture of above azides was dissolved in anhydrous THF (400 mL) and  $\text{PPh}_3$  (10.6 g, 40.6 mmol) added. The reaction mixture was stirred at rt for 18 h, then 2M NaOH (60 mL) added and the mixture extracted with EtOAc (3 x 200 mL). The combined organics were dried ( $\text{Na}_2\text{SO}_4$ ) and concentrated to afford a brown oil. The residue was dissolved in  $\text{CH}_2\text{Cl}_2$  (350 mL) and acetic acid (1.20 mL, 20.3 mmol) added, followed by sodium triacetoxyborohydride (8.60 g, 40.6 mmol). The reaction was stirred at rt for 18 h, then quenched with 2M NaOH (70 mL) and extracted with  $\text{CH}_2\text{Cl}_2$  (3 x 100 mL). The combined organics were dried ( $\text{Na}_2\text{SO}_4$ ) and concentrated to afford a brown oil. The crude product was purified by chromatography (silica gel, 90:9:1  $\text{CH}_2\text{Cl}_2$ :MeOH: $\text{NH}_4\text{OH}$ ) to afford the title compound (3.30 g, 20% from diene **3c**, mixture of diastereoisomers) as a brown oil.

The diastereomeric mixture was dissolved in MeOH (150 mL) and  $\text{K}_2\text{CO}_3$  (7.20 g, 52.4 mmol) added. The reaction was stirred at rt for 18 h, then concentrated to a brown oil, which was dissolved in  $\text{CH}_2\text{Cl}_2$  (100 mL) and  $\text{H}_2\text{O}$  (30 mL). The aqueous layer was extracted with  $\text{CH}_2\text{Cl}_2$  (4 x 100 mL). The combined organics were dried ( $\text{Na}_2\text{SO}_4$ ) and concentrated to afford the title compound (2.44 g, 74%, >9:1 dr) as a yellow solid foam.  $\delta_{\text{H}}$  (500 MHz,  $\text{CDCl}_3$ ) 7.26 – 7.12 (m, 5H), 3.11 – 3.05 (m, 2H), 2.79 (dd,  $J = 14.5, 2.6$  Hz, 1H), 2.72 (ddd,  $J = 12.2, 12.2, 2.7$  Hz, 1H), 2.43 (ddd,  $J = 10.8, 8.1, 1.9$  Hz, 1H), 2.37 (dd,  $J = 12.8, 3.8$  Hz, 1H),

2.31 – 2.22 (m, 1H), 2.18 – 2.12 (m, 2H), 1.89 – 1.83 (m, 2H), 1.81 – 1.76 (m, 1H), 1.66 (ddd,  $J = 12.9, 5.9, 2.5$  Hz, 1H), 1.58 – 1.49 (m, 1H), 1.42 – 1.23 (m, 4H), 1.19 – 1.05 (m, 2H);  $\delta_c$  (125 MHz,  $\text{CDCl}_3$ ) 209.9 (C), 141.5 (C), 129.3 (CH), 128.2 (CH), 125.7 (CH), 59.9 (CH), 58.0 (CH), 52.3 (CH), 48.9 ( $\text{CH}_2$ ), 46.2 ( $\text{CH}_2$ ), 46.0 (CH), 41.5 (CH), 34.3 ( $\text{CH}_2$ ), 33.2 ( $\text{CH}_2$ ), 31.9 ( $\text{CH}_2$ ), 31.2 ( $\text{CH}_2$ ), 24.3 ( $\text{CH}_2$ );  $m/z$  (ESI+) found  $[\text{M}+\text{H}]^+$  284.1991.  $\text{C}_{19}\text{H}_{26}\text{NO}^+$  requires 284.2009.

#### Dimethyl (4-(4-methoxyphenyl)-2-oxobutyl)phosphonate (7d)

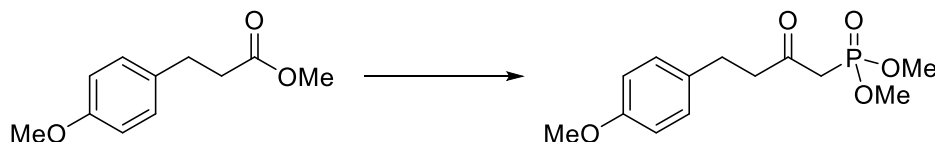

n-Butyllithium (2.5 M in hexanes, 22.0 mL, 55.1 mmol) was added slowly to a solution of dimethyl methylphosphonate (6.00 mL, 55.1 mmol) in anhydrous THF (100 mL) at  $-78$  °C under argon. The reaction mixture was stirred at  $-78$  °C for 1 h, then a solution methyl 3-(4-methoxyphenyl)propanoate<sup>2</sup> (10.7 g, 55.1 mmol) in THF (50 mL) was added dropwise. The mixture was stirred at  $-78$  °C for 5 min, then at rt for 30 min, after which the reaction was quenched with saturated aqueous  $\text{NH}_4\text{Cl}$  (100 mL) and extracted with  $\text{Et}_2\text{O}$  (3 x 100 mL). The combined organics were dried ( $\text{Na}_2\text{SO}_4$ ) and concentrated to afford a pale yellow oil (15.8 g). The crude product was purified by chromatography (silica gel, 100% EtOAc) to afford the title compound (9.00 g, 57%) as a colourless oil.  $\nu_{\text{max}}$  (film)/ $\text{cm}^{-1}$  2956, 1712, 1243, 1021;  $\delta_{\text{H}}$  (400 MHz,  $\text{CDCl}_3$ ) 7.23 – 7.06 (m, 2H), 6.93 – 6.76 (m, 2H), 3.80 (s, 3H), 3.79 (s, 3H), 3.76 (s, 3H), 3.09 (d,  $J = 22.7$  Hz, 2H), 2.98 – 2.84 (m, 4H);  $\delta_c$  (100 MHz,  $\text{CDCl}_3$ ) 201.1 (C, d,  $J = 6.1$  Hz), 158.0 (C), 132.6 (C), 129.3 (CH), 113.9 (CH), 55.3 ( $\text{CH}_3$ ), 53.1 ( $\text{CH}_3$ ), 53.0 ( $\text{CH}_3$ ), 45.8 ( $\text{CH}_2$ ), 41.5 ( $\text{CH}_2$ , d,  $J = 128$  Hz), 28.6 ( $\text{CH}_2$ );  $m/z$  (ESI+) found  $[\text{M}+\text{H}]^+$  287.1049.  $\text{C}_{13}\text{H}_{20}\text{O}_5\text{P}^+$  requires 287.1043.

#### (E)-7-Azido-1-(4-methoxyphenyl)hept-4-en-3-one (S3)

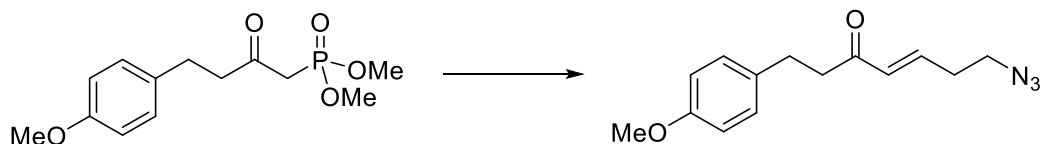

Sodium hydride (60% dispersion in oil, 1.54 g, 38.6 mmol) was added portionwise to a solution of **7d** (8.50 g, 29.7 mmol) in anhydrous THF (100 mL) at  $-50$  °C under argon. The resulting suspension was warmed from  $-78$  °C to  $0$  °C over 2.5 h, then cooled to  $-10$  °C and a solution of 3-azidopropanal<sup>3</sup> (3.82 g, 38.6 mmol) in THF (20 mL) was added over 5 min. The reaction mixture was stirred between  $0$  and  $-10$  °C for 1 h, then at rt for 45 min. Water (50 mL) was then added and extracted with  $\text{Et}_2\text{O}$  (2 x 50 mL). The combined organics were washed with brine (50 mL), dried ( $\text{Na}_2\text{SO}_4$ ) and concentrated to afford a brown oil (10.1 g). The crude product was purified by automated chromatography (2 x 40 g columns, 0 to 25%

EtOAc in hexanes over 15 min) to afford the title compound (4.5 g, 58%) as a yellow oil.  $\nu_{\max}$  (film)/ $\text{cm}^{-1}$  2935, 2094, 1511;  $\delta_{\text{H}}$  (400 MHz,  $\text{CDCl}_3$ ) 7.17 – 7.05 (m, 2H), 6.86 – 6.81 (m, 2H), 6.76 (dt,  $J$  = 15.9, 6.9 Hz, 1H), 6.19 (dt,  $J$  = 15.9, 1.5 Hz, 1H), 3.79 (s, 3H), 3.42 (t,  $J$  = 6.7 Hz, 2H), 3.04 – 2.80 (m, 4H), 2.49 (dtd,  $J$  = 6.9, 6.9, 1.5 Hz, 2H);  $\delta_{\text{C}}$  (100 MHz,  $\text{CDCl}_3$ ) 199.1 (C), 158.0 (C), 142.0 (CH), 133.1 (C), 132.3 (CH), 129.3 (CH), 113.9 (CH), 55.3 ( $\text{CH}_3$ ), 49.7 ( $\text{CH}_2$ ), 42.2 ( $\text{CH}_2$ ), 31.8 ( $\text{CH}_2$ ), 29.1 ( $\text{CH}_2$ );  $m/z$  (ESI+) found  $[\text{M}+\text{H}]^+$  260.1421.  $\text{C}_{14}\text{H}_{18}\text{N}_3\text{O}_2^+$  requires 260.1394.

### (((2Z,4E)-7-azido-1-(4-methoxyphenyl)hepta-2,4-dien-3-yl)oxy)trimethylsilane (**3d**)

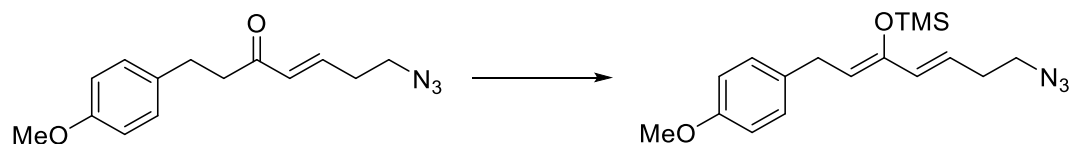

TMSOTf (4.65 mL, 25.7 mmol) was added dropwise to a solution of azide **53** (4.45 g, 17.2 mmol) and  $\text{Et}_3\text{N}$  (7.18 mL, 51.5 mmol) in anhydrous  $\text{CH}_2\text{Cl}_2$  (150 mL) at  $-30\text{ }^\circ\text{C}$  under argon. The resulting yellow solution was stirred at  $-30\text{ }^\circ\text{C}$  for 15 min then at  $0\text{ }^\circ\text{C}$  for 15 min, then quenched with sat. aq.  $\text{NaHCO}_3$  (50 mL) and extracted with  $\text{CH}_2\text{Cl}_2$  (2 x 50 mL). The combined organics were dried ( $\text{Na}_2\text{SO}_4$ ) and concentrated to afford a brown oil, which was dissolved in 4:1 hexanes: EtOAc and passed through a Florisil plug with 4:1 hexanes: EtOAc washings. The filtrate was concentrated to afford the title compound (5.50 g, 96%) as a yellow oil that was used immediately in the next step.  $\delta_{\text{H}}$  (400 MHz,  $\text{CDCl}_3$ ) 6.93 – 6.88 (m, 2H), 6.65 – 6.60 (m, 2H), 5.80 (d,  $J$  = 15.4 Hz, 1H), 5.55 (dt,  $J$  = 15.0, 7.1 Hz, 1H), 4.71 (t,  $J$  = 7.1 Hz, 1H), 3.58 (s, 3H), 3.20 (d,  $J$  = 7.1 Hz, 2H), 3.12 (t,  $J$  = 7.1 Hz, 2H), 2.19 (dt,  $J$  = 7.1, 7.1 Hz, 2H), 0.05 (s, 9H).

### Amine scaffold **6d**

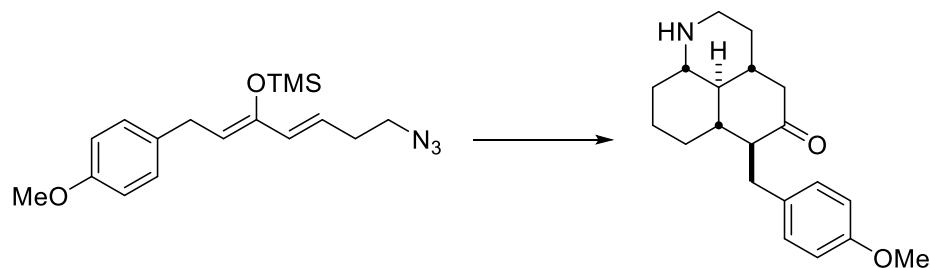

$\text{BF}_3 \cdot \text{OEt}_2$  (1.47 mL, 11.9 mmol) was added to a solution of cyclohexenone (1.15 mL, 11.9 mmol) in anhydrous  $\text{CH}_2\text{Cl}_2$  (100 mL) with 4Å MS (~5 g) at  $-78\text{ }^\circ\text{C}$  under argon. The mixture was stirred at  $-78\text{ }^\circ\text{C}$  for 5 min, then a solution of silyloxydiene **3d** (5.50 g, 16.6 mmol) in  $\text{CH}_2\text{Cl}_2$  (20 mL) was added over 10 min. The reaction was allowed to warm from  $-78\text{ }^\circ\text{C}$  to rt and stirred for 18 h. The reaction was quenched with  $\text{H}_2\text{O}$  (50 mL) and extracted with  $\text{CH}_2\text{Cl}_2$  (3 x 50 mL). The combined organics were dried ( $\text{Na}_2\text{SO}_4$ ) and concentrated to afford a brown oily solid (5.72 g). The crude product was purified by

automated chromatography (40 g silica column, 0 to 10% MeOH in CH<sub>2</sub>Cl<sub>2</sub> over 20 min). All of the fractions containing the correct mass were combined to afford a brown oil (4.85 g).

The diastereomeric mixture of above azides was dissolved in anhydrous THF (200 mL) and PPh<sub>3</sub> (7.16 g, 27.3 mmol) added. The reaction mixture was stirred at rt for 18 h, then 2M NaOH (50 mL) added and the mixture extracted with EtOAc (3 x 100 mL). The combined organics were dried (Na<sub>2</sub>SO<sub>4</sub>) and concentrated to afford a brown oil. The residue was dissolved in CH<sub>2</sub>Cl<sub>2</sub> (200 mL) and acetic acid (780 μL, 13.6 mmol) added, followed by sodium triacetoxyborohydride (5.79 g, 27.3 mmol). The reaction was stirred at rt for 18 h, then quenched with 2M NaOH (50 mL) and extracted with CH<sub>2</sub>Cl<sub>2</sub> (3 x 50 mL). The combined organics were dried (Na<sub>2</sub>SO<sub>4</sub>) and concentrated to afford a brown oil (15 g). The crude product was purified by chromatography (silica gel, 90:9:1 CH<sub>2</sub>Cl<sub>2</sub>:MeOH:NH<sub>4</sub>OH) to afford the title compound (1.70 g, 46% from silyloxydiene **3d**, 4:1 dr) as a brown oil.

The diastereomeric mixture was dissolved in MeOH (50 mL) and K<sub>2</sub>CO<sub>3</sub> (3.37 g, 24.4 mmol) added. The reaction was stirred at rt for 18 h, then concentrated to a brown oil, which was dissolved in CH<sub>2</sub>Cl<sub>2</sub> (100 mL) and H<sub>2</sub>O (30 mL). The aqueous layer was extracted with CH<sub>2</sub>Cl<sub>2</sub> (4 x 100 mL). The combined organics were dried (Na<sub>2</sub>SO<sub>4</sub>) and concentrated to afford the title compound (1.65 g, 97%, 9:1 dr) as a brown solid foam.  $\nu_{\max}$  (film)/cm<sup>-1</sup> 2925, 1707, 1511, 1245;  $\delta_{\text{H}}$  (400 MHz, CDCl<sub>3</sub>) 7.12 – 7.07 (m, 2H), 6.81 – 6.75 (m, 2H), 3.77 (s, 3H), 3.32 (d, *J* = 12.4 Hz, 1H), 2.96 (dd, *J* = 14.3, 7.9 Hz, 1H), 2.88 – 2.78 (m, 2H), 2.65 – 2.58 (m, 1H), 2.49 – 2.39 (m, 2H), 2.25 – 2.07 (m, 3H), 1.94 – 1.87 (m, 1H), 1.80 – 1.52 (m, 5H), 1.42 – 1.26 (m, 2H), 1.24 – 1.13 (m, 1H);  $\delta_{\text{C}}$  (100 MHz, CDCl<sub>3</sub>) 208.4 (C), 157.7 (C), 132.6 (C), 130.2 (CH), 113.7 (CH), 59.0 (CH), 57.4 (CH), 55.2 (CH<sub>3</sub>), 48.0 (CH), 47.7 (CH<sub>2</sub>), 45.2 (CH), 43.7 (CH<sub>2</sub>), 39.5 (CH), 30.9 (CH<sub>2</sub>), 30.1 (CH<sub>2</sub>), 30.1 (CH<sub>2</sub>), 29.7 (CH<sub>2</sub>), 23.8 (CH<sub>2</sub>); *m/z* (ESI+) found [M+H]<sup>+</sup> 314.2137. C<sub>20</sub>H<sub>28</sub>NO<sub>2</sub><sup>+</sup> requires 314.2115.

#### Amine **9b**{1}

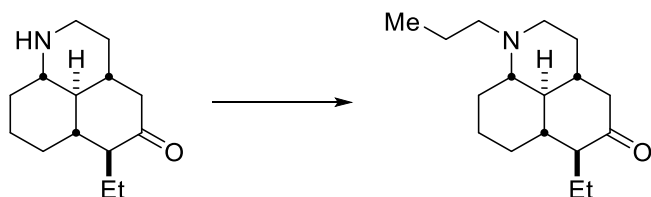

Propionaldehyde (1.22 mL, 16.8 mmol) was added to a solution of amine **6b** (2.48 g, 11.2 mmol) in anhydrous CH<sub>2</sub>Cl<sub>2</sub> (100 mL) at rt under argon. Acetic acid (640 μL, 11.2 mmol) was then added, followed by sodium triacetoxyborohydride (4.75 g, 22.4 mmol). The reaction mixture was stirred at rt for 48 h, then quenched with 2 M NaOH (50 mL) and extracted with CH<sub>2</sub>Cl<sub>2</sub> (3 x 50 mL). The combined organics were dried (Na<sub>2</sub>SO<sub>4</sub>) and concentrated to afford the title compound (2.94 g, 100%) as a yellow oil, which was used without further purification.  $\nu_{\max}$  (film)/cm<sup>-1</sup> 2929, 1711;  $\delta_{\text{H}}$  (400 MHz, CDCl<sub>3</sub>) 3.04-2.99 (1H, m), 2.74-2.66 (1H, m), 2.58-2.51 (1H, m), 2.40-2.32 (2H, m), 2.17-1.87 (6H, m), 1.70-1.41 (7H, m), 1.36-

1.19 (4H, m), 1.10-1.00 (1H, m), 0.87 (3H, t, *J* 7.2), 0.85 (3H, t, *J* 7.6);  $\delta_c$  (100 MHz, CDCl<sub>3</sub>) 210.8 (C), 63.9 (CH), 56.1 (CH), 54.8 (CH<sub>2</sub>), 52.4 (CH<sub>2</sub>), 50.4 (CH), 48.8 (CH<sub>2</sub>), 44.7 (CH), 41.4 (CH), 32.9 (CH<sub>2</sub>), 31.2 (CH<sub>2</sub>), 29.5 (CH<sub>2</sub>), 24.6 (CH<sub>2</sub>), 17.9 (CH<sub>2</sub>), 17.1 (CH<sub>2</sub>), 12.0 (CH<sub>3</sub>), 11.2 (CH<sub>3</sub>); *m/z* (ESI+) found [M+H]<sup>+</sup> 264.2314. C<sub>17</sub>H<sub>30</sub>NO<sup>+</sup> requires 264.2322.

### Alcohol S4

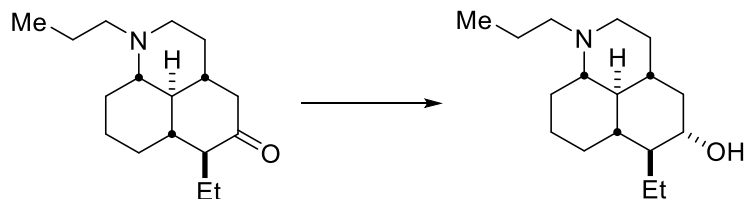

L-Selectride (1 M in THF, 8.10 mL) was added dropwise to a solution of **9b{1}** (850 mg, 3.23 mmol) in anhydrous THF (20 mL) at -78 °C under argon. The reaction mixture was allowed to warm slowly to rt and stirred for 18 h, then quenched with 30% aq H<sub>2</sub>O<sub>2</sub> (5.1 mL) and 2 M NaOH (6.8 mL). The mixture was stirred at rt for 1 h, then extracted with CH<sub>2</sub>Cl<sub>2</sub> (3 x 20 mL). The combined organics were dried (Na<sub>2</sub>SO<sub>4</sub>) and concentrated to afford a yellow oil. The crude product was purified by chromatography (silica gel, 90:9:1 CH<sub>2</sub>Cl<sub>2</sub>:MeOH:NH<sub>4</sub>OH) to afford the title compound (825 mg, 96%) as a yellow oil.  $\delta_H$  (500 MHz, CDCl<sub>3</sub>) 4.03 (br s, 1H), 2.93 (ddd, *J* = 11.3, 3.8, 3.8 Hz, 1H), 2.70 – 2.56 (m, 1H), 2.55 – 2.40 (m, 1H), 2.32 (ddd, *J* = 12.0, 12.0, 2.5 Hz, 1H), 2.14 – 2.00 (m, 1H), 1.96 – 1.76 (m, 4H), 1.68 – 1.60 (m, 1H), 1.53 (ddd, *J* = 12.6, 2.7, 2.7 Hz, 1H), 1.50 – 1.40 (m, 3H), 1.41 – 0.94 (m, 7H), 0.94 – 0.87 (m, 3H), 0.84 (t, *J* = 7.4 Hz, 3H), 0.81 – 0.71 (m, 2H);  $\delta_c$  (125 MHz, CDCl<sub>3</sub>) 66.5 (CH), 63.5 (CH), 55.3 (CH<sub>2</sub>), 52.7 (CH<sub>2</sub>), 51.4 (CH), 47.6 (CH), 40.3 (CH<sub>2</sub>), 38.6 (CH), 33.3 (CH), 32.8 (CH<sub>2</sub>), 29.9 (CH<sub>2</sub>), 29.8 (CH<sub>2</sub>), 24.5 (CH<sub>2</sub>), 21.4 (CH<sub>2</sub>), 17.1 (CH<sub>2</sub>), 12.0 (CH<sub>3</sub>), 11.7 (CH<sub>3</sub>); *m/z* (ESI+) found [M+H]<sup>+</sup> 266.2480. C<sub>17</sub>H<sub>32</sub>NO<sup>+</sup> requires 266.2478

### 3. Experimental procedures for library synthesis

#### General procedure for the preparation of amines.

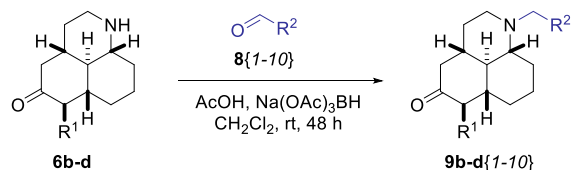

3{1} R = Et  
 3{2} R = thiazol-2-yl  
 3{3} R = *N*-methylimidazol-2-yl  
 3{4} R = (CH<sub>2</sub>)<sub>2</sub>Ph  
 3{5} R = Ph

3{6} R = 4-ClC<sub>6</sub>H<sub>4</sub>  
 3{7} R = 4-MeOC<sub>6</sub>H<sub>4</sub>  
 3{8} R = 4-MeC<sub>6</sub>H<sub>4</sub>  
 3{9} R = 2-O<sub>2</sub>NC<sub>6</sub>H<sub>4</sub>  
 3{10} R = 2-F<sub>3</sub>CC<sub>6</sub>H<sub>4</sub>



Each reaction tube of a 24-position Bohdan Miniblock XT was flushed with argon, then a solution of the amine scaffold **6b-d** (70 mg) in anhydrous dichloromethane (2 mL) was added, followed by the appropriate aldehyde (1.5 equiv), acetic acid (1 equiv) and Na(OAc)<sub>3</sub>BH (2 equiv). The reactions were shaken at 500 rpm at rt for 48 h, then 2 M NaOH (1 mL) added. The reactions were passed through Isolute<sup>®</sup> hydrophobic phase separator tubes, which allowed the halogenated solvent layer to pass through. The aqueous layers were extracted with dichloromethane (2 x 2 mL). The combined organics were evaporated in a Genevac EZ-2 Plus parallel evaporator and subjected to mass-directed preparative HPLC purification to afford pure amines **9b-d**{1-10}.

| Compound       | Calculated m/w | Found m/w | Recovered mass (mg) | Yield (%) | Purity (%) |
|----------------|----------------|-----------|---------------------|-----------|------------|
| <b>9b</b> {2}  | 319.1839       | 319.1847  | 42.8                | 42        | 94.1       |
| <b>9b</b> {3}  | 316.2384       | 316.2376  | 33.5                | 33        | 100.0      |
| <b>9b</b> {4}  | 340.2635       | 340.2598  | 55.2                | 51        | 95.0       |
| <b>9b</b> {5}  | 312.2322       | 312.2325  | 24.6                | 25        | 100.0      |
| <b>9b</b> {6}  | 346.1932       | 346.1959  | 37.8                | 34        | 100.0      |
| <b>9b</b> {7}  | 342.2428       | 342.2430  | 36.7                | 34        | 97.7       |
| <b>9b</b> {8}  | 326.2479       | 326.2480  | 12.8                | 12        | 95.2       |
| <b>9b</b> {9}  | 357.2173       | 357.2193  | 11.9                | 10        | 12.5       |
| <b>9b</b> {10} | 380.2196       | 380.2229  | 23.8                | 20        | 97.3       |
| <b>9c</b> {1}  | 326.2479       | 326.2516  | 37.8                | 46        | 100.0      |
| <b>9c</b> {2}  | 381.1995       | 381.2039  | 49.6                | 52        | 100.0      |
| <b>9c</b> {3}  | 378.2540       | 378.2560  | 71.9                | 76        | 100.0      |
| <b>9c</b> {4}  | 402.2792       | 402.2818  | 56.8                | 56        | 100.0      |
| <b>9c</b> {5}  | 374.2479       | 374.2523  | 61.7                | 66        | 100.0      |
| <b>9c</b> {6}  | 408.2089       | 408.2108  | 60.2                | 59        | 98.2       |
| <b>9c</b> {7}  | 404.2584       | 404.2609  | 52.4                | 52        | 100.0      |
| <b>9c</b> {9}  | 419.2329       | 419.2354  | 55.5                | 53        | 97.4       |
| <b>9c</b> {10} | 442.2352       | 442.2374  | 45.6                | 41        | 94.5       |
| <b>9d</b> {1}  | 356.2584       | 356.2596  | 44.6                | 66        | 98.2       |
| <b>9d</b> {2}  | 411.2101       | 411.2119  | 4.7                 | 6         | 1.0        |
| <b>9d</b> {3}  | 408.2646       | 408.2629  | 18.7                | 24        | 98.0       |
| <b>9d</b> {4}  | 432.2897       | 432.2902  | 25.1                | 31        | 93.8       |
| <b>9d</b> {5}  | 404.2584       | 404.2580  | 2.8                 | 4         | 63.7       |
| <b>9d</b> {6}  | 438.2195       | 438.2191  | 25.2                | 30        | 97.9       |
| <b>9d</b> {7}  | 434.2690       | 434.2690  | 22.1                | 27        | 48.7       |

#### General procedure for the preparation of amides.

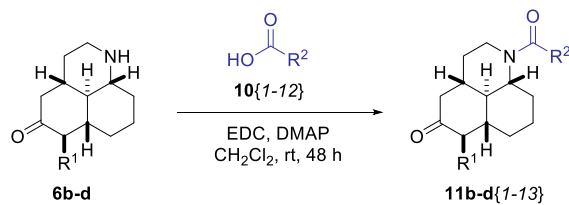

- |                                                                                |                                                   |
|--------------------------------------------------------------------------------|---------------------------------------------------|
| <b>5{1}</b> R <sup>2</sup> = Ph                                                | <b>5{7}</b> R <sup>2</sup> = nBu                  |
| <b>5{2}</b> R <sup>2</sup> = 4-ClC <sub>6</sub> H <sub>4</sub>                 | <b>5{8}</b> R <sup>2</sup> = cyclobutyl           |
| <b>5{3}</b> R <sup>2</sup> = 4-MeOC <sub>6</sub> H <sub>4</sub>                | <b>5{9}</b> R <sup>2</sup> = cyclohexyl           |
| <b>5{4}</b> R <sup>2</sup> = 4-MeC <sub>6</sub> H <sub>4</sub>                 | <b>5{10}</b> R <sup>2</sup> = thiophen-3-ylmethyl |
| <b>5{5}</b> R <sup>2</sup> = 3,4-Cl <sub>2</sub> C <sub>6</sub> H <sub>3</sub> | <b>5{11}</b> R <sup>2</sup> = pyridin-3-yl        |
| <b>5{6}</b> R <sup>2</sup> = 3-Me <sub>2</sub> NC <sub>6</sub> H <sub>4</sub>  | <b>5{12}</b> R <sup>2</sup> = phenylethynyl       |

Each reaction tube of a 24-position Bohdan Miniblock XT was flushed with argon, then a solution of the amine scaffold **6b-d** (70 mg) in anhydrous dichloromethane (2 mL) was added, followed by the appropriate acid (1.2 equiv), EDC (1.2 equiv) and DMAP (1.2 equiv). The reactions were shaken at 500 rpm at rt for 48 h, then water (2 mL) added. The reactions were passed through Isolute<sup>®</sup> hydrophobic phase separator tubes, which allowed the halogenated solvent layer to pass through. The aqueous layers were extracted with dichloromethane (2 x 2 mL). The combined organics were evaporated in a Genevac EZ-2 Plus parallel evaporator and subjected to mass-directed preparative HPLC purification to afford pure amides **11b-d{1-13}**.

| Compound       | Calculated m/w | Found m/w | Recovered mass (mg) | Yield (%) | Purity(%) |
|----------------|----------------|-----------|---------------------|-----------|-----------|
| <b>11b{1}</b>  | 326.2115       | 326.2130  | 39.5                | 38        | 98.0      |
| <b>11b{2}</b>  | 360.1725       | 360.1729  | 40.5                | 35        | 96.6      |
| <b>11b{3}</b>  | 356.2220       | 356.2238  | 49.1                | 43        | 100.0     |
| <b>11b{4}</b>  | 340.2271       | 340.2284  | 38.8                | 36        | 95.3      |
| <b>11b{5}</b>  | 394.1335       | 394.1352  | 56.5                | 45        | 91.6      |
| <b>11b{6}</b>  | 369.2537       | 369.2548  | 41.5                | 35        | 85.9      |
| <b>11b{7}</b>  | 306.2428       | 306.2446  | 26.3                | 27        | 88.7      |
| <b>11b{8}</b>  | 304.2271       | 304.2273  | 31.3                | 32        | 90.6      |
| <b>11b{9}</b>  | 332.2584       | 332.2583  | 3.9                 | 4         | 84.8      |
| <b>11b{10}</b> | 346.1835       | 346.1855  | 35.5                | 32        | 97.5      |
| <b>11b{11}</b> | 327.2067       | 327.2074  | 3.3                 | 3         | 100.0     |
| <b>11c{1}</b>  | 388.2271       | 388.2291  | 43.2                | 45        | 100.0     |
| <b>11c{2}</b>  | 422.1882       | 422.1902  | 60.6                | 57        | 97.8      |
| <b>11c{3}</b>  | 418.2377       | 418.2392  | 54.8                | 52        | 100.0     |
| <b>11c{4}</b>  | 402.2428       | 402.2451  | 50.0                | 50        | 97.9      |
| <b>11c{5}</b>  | 456.1492       | 456.1538  | 25.6                | 22        | 100.0     |
| <b>11c{6}</b>  | 431.2693       | 431.2729  | 59.3                | 55        | 96.3      |
| <b>11c{7}</b>  | 368.2584       | 368.2603  | 40.7                | 44        | 98.6      |
| <b>11c{8}</b>  | 366.2428       | 366.2454  | 43.3                | 47        | 100.0     |
| <b>11c{9}</b>  | 394.2741       | 394.2754  | 46.2                | 47        | 100.0     |
| <b>11c{10}</b> | 408.1992       | 408.2026  | 48.6                | 48        | 100.0     |
| <b>11c{11}</b> | 389.2224       | 389.2241  | 46.6                | 48        | 100.0     |

|                 |          |          |      |    |       |
|-----------------|----------|----------|------|----|-------|
| <b>11c</b> {12} | 412.2271 | 412.2288 | 20.6 | 20 | 99.0  |
| <b>11d</b> {1}  | 418.2377 | 418.2359 | 22.0 | 28 | 98.6  |
| <b>11d</b> {2}  | 452.1987 | 452.1982 | 25.5 | 30 | 100.0 |
| <b>11d</b> {7}  | 398.2690 | 398.2692 | 25.6 | 34 | 98.7  |
| <b>11d</b> {8}  | 396.2533 | 396.2527 | 29.2 | 39 | 100.0 |
| <b>11d</b> {10} | 438.2098 | 438.2088 | 29.7 | 36 | 100.0 |

### General procedure for the preparation of sulfonamides.

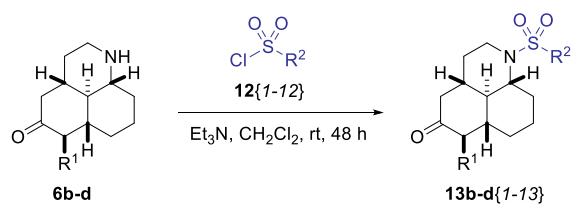

|                                                                         |                                                                                         |
|-------------------------------------------------------------------------|-----------------------------------------------------------------------------------------|
| 7{1} R <sup>2</sup> = Ph                                                | 7{7} R <sup>2</sup> = 4-FC <sub>6</sub> H <sub>4</sub>                                  |
| 7{2} R <sup>2</sup> = 4-ClC <sub>6</sub> H <sub>4</sub>                 | 7{8} R <sup>2</sup> = 4-nBuC <sub>6</sub> H <sub>4</sub>                                |
| 7{3} R <sup>2</sup> = 4-MeOC <sub>6</sub> H <sub>4</sub>                | 7{9} R <sup>2</sup> = 2,4-(NO <sub>2</sub> ) <sub>2</sub> C <sub>6</sub> H <sub>3</sub> |
| 7{4} R <sup>2</sup> = 4-MeC <sub>6</sub> H <sub>4</sub>                 | 7{10} R <sup>2</sup> = benzyl                                                           |
| 7{5} R <sup>2</sup> = 3,5-Cl <sub>2</sub> C <sub>6</sub> H <sub>3</sub> | 7{11} R <sup>2</sup> = naphthyl                                                         |
| 7{6} R <sup>2</sup> = 4-F <sub>3</sub> CC <sub>6</sub> H <sub>4</sub>   | 7{12} R <sup>2</sup> = <i>N</i> -methylimidazol-2-yl                                    |

Each reaction tube of a 24-position Bohdan Miniblock XT was flushed with argon, then a solution of the amine scaffold **6b-d** (70 mg) in anhydrous dichloromethane (2 mL) was added, followed by the appropriate sulfonyl chloride (1.5 equiv) and Et<sub>3</sub>N (1.5 equiv). The reactions were shaken at 500 rpm at rt for 48 h, then water (2 mL) added. The reactions were passed through Isolute<sup>®</sup> hydrophobic phase separator tubes, which allowed the halogenated solvent layer to pass through. The aqueous layers were extracted with dichloromethane (2 x 2 mL). The combined organics were evaporated in a Genevac EZ-2 Plus parallel evaporator and subjected to mass-directed preparative HPLC purification to afford pure sulfonamides **13b-d**{1-13}.

| Compound        | Calculated m/w | Found m/w | Recovered mass (mg) | Yield (%) | Purity (%) |
|-----------------|----------------|-----------|---------------------|-----------|------------|
| <b>13b</b> {1}  | 362.1785       | 362.1800  | 30.6                | 26        | 95.7       |
| <b>13b</b> {2}  | 396.1395       | 396.1426  | 55.6                | 44        | 98.9       |
| <b>13b</b> {3}  | 392.1890       | 392.1899  | 47.6                | 38        | 93.4       |
| <b>13b</b> {4}  | 376.1941       | 376.1953  | 51.0                | 42        | 98.9       |
| <b>13b</b> {5}  | 430.1005       | 430.1036  | 56.8                | 41        | 100.0      |
| <b>13b</b> {6}  | 430.1658       | 430.1689  | 58.2                | 42        | 98.5       |
| <b>13b</b> {7}  | 380.1690       | 380.1705  | 47.4                | 39        | 97.3       |
| <b>13b</b> {8}  | 418.2411       | 418.2436  | 51.6                | 39        | 97.3       |
| <b>13b</b> {9}  | 452.1486       | N/A       | 0.0                 | 0         | -          |
| <b>13b</b> {10} | 376.1941       | 376.1960  | 6.8                 | 6         | 87.8       |
| <b>13b</b> {11} | 412.1941       | 412.1971  | 22.8                | 17        | 98.2       |

|                |          |          |      |    |       |
|----------------|----------|----------|------|----|-------|
| <b>13b{12}</b> | 366.1846 | 366.1856 | 46.9 | 40 | 93.5  |
| <b>13c{1}</b>  | 424.1941 | 424.1954 | 56.7 | 53 | 100.0 |
| <b>13c{2}</b>  | 458.1551 | 458.1566 | 64.1 | 56 | 98.9  |
| <b>13c{3}</b>  | 454.2047 | 454.2046 | 61.2 | 54 | 98.9  |
| <b>13c{4}</b>  | 438.2098 | 438.2108 | 44.8 | 41 | 100.0 |
| <b>13c{5}</b>  | 492.1162 | 492.1176 | 57.5 | 47 | 98.2  |
| <b>13c{6}</b>  | 492.1815 | 492.1849 | 66.5 | 54 | 100.0 |
| <b>13c{7}</b>  | 442.1847 | 442.1869 | 57.7 | 52 | 98.9  |
| <b>13c{8}</b>  | 480.2567 | 480.2560 | 1.9  | 2  | 92.9  |
| <b>13c{9}</b>  | 514.1643 | N/A      | 0.0  | 0  | -     |
| <b>13c{10}</b> | 438.2098 | 438.2118 | 39.8 | 36 | 100.0 |
| <b>13c{11}</b> | 474.2098 | 474.2117 | 56.0 | 47 | 100.0 |
| <b>13c{12}</b> | 428.2003 | 428.2030 | 67.3 | 63 | 97.7  |
| <b>13d{1}</b>  | 454.2047 | 454.2047 | 14.6 | 17 | 98.7  |
| <b>13d{2}</b>  | 488.1657 | 488.1643 | 39.8 | 43 | 100.0 |
| <b>13d{3}</b>  | 484.2152 | 484.2137 | 22.7 | 25 | 100.0 |
| <b>13d{12}</b> | 458.2108 | 458.2125 | 12.3 | 14 | 100.0 |

#### General procedure for the preparation of 3*H*-indoles.

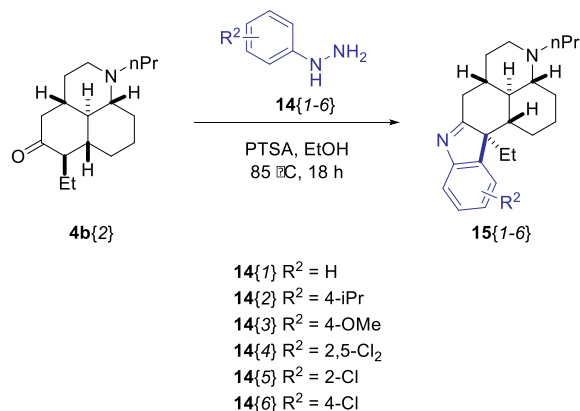

PTSA (510 mg, 2.3 mmol) was added to a solution of amine scaffold **4b{2}** (60 mg, 0.23 mmol) in EtOH (1.5 mL) in a microwave vial, followed by the appropriate hydrazine (hydrochloride) (2.5 equiv). The vial was sealed then heated in an oil bath at 90 °C for 4 h, then cooled to rt, 2 M NaOH (2 mL) added and the mixture extracted with CH<sub>2</sub>Cl<sub>2</sub> (3 x 5 mL). The combined organics were dried (Na<sub>2</sub>SO<sub>4</sub>) and concentrated under reduced pressure. The residues were subjected to mass-directed preparative HPLC purification to afford pure 3*H*-indoles **15{1-6}**.

| Compound     | Calculated m/z | Found m/z | Recovered weight (mg) | Yield (%) | Purity (%) |
|--------------|----------------|-----------|-----------------------|-----------|------------|
| <b>15{1}</b> | 337.2638       | 337.2645  | 31.9                  | 41        | 98.3       |
| <b>15{2}</b> | 379.3108       | 379.3119  | 33.9                  | 39        | 100.0      |

|              |          |          |      |    |       |
|--------------|----------|----------|------|----|-------|
| <b>15{3}</b> | 367.2744 | 367.2767 | 23.0 | 27 | 98.9  |
| <b>15{4}</b> | 405.1859 | 405.1856 | 9.3  | 10 | 48.6  |
| <b>15{5}</b> | 371.2249 | 371.2259 | 29.2 | 34 | 100.0 |
| <b>15{6}</b> | 371.2249 | 371.2258 | 48.6 | 57 | 100.0 |

### General procedure for the preparation of quinolines.

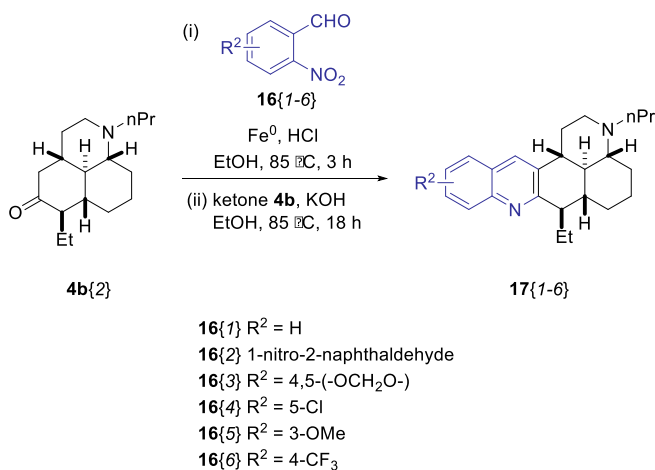

$\text{Fe}^0$  powder (77 mg, 1.4 mmol) was added to a solution of nitrobenzaldehyde **16{1-6}** (0.35 mmol) in ethanol (1 mL) in a microwave vial, followed by 0.1 M HCl (180  $\mu\text{L}$ ). The vial was sealed, then heated in an oil bath at 85 °C until complete by TLC (~2 h). The mixture was cooled to rt, then a solution of ketone scaffold **4b{2}** (0.27 mmol) in EtOH (2 mL) added, followed by powdered KOH (18 mg, 0.32 mmol). The mixture was heated at 85 °C for 18 h, then cooled to rt, passed through a celite plug and eluted with dichloromethane, and concentrated under reduced pressure. The residues were subjected to mass-directed preparative HPLC purification to afford pure quinolines **17{1-6}**.

| Compound     | Calculated m/w | Found m/w | Recovered weight (mg) | Yield (%) | Purity (%) |
|--------------|----------------|-----------|-----------------------|-----------|------------|
| <b>17{1}</b> | 349.2638       | 349.2640  | 41.6                  | 44        | 97.4       |
| <b>17{2}</b> | 399.2795       | 399.2809  | 40.7                  | 38        | 100.0      |
| <b>17{3}</b> | 393.2537       | 393.2561  | 27.7                  | 26        | 94.8       |
| <b>17{4}</b> | 383.2249       | 383.2255  | 27.6                  | 27        | 97.9       |
| <b>17{5}</b> | 379.2744       | 379.2762  | 54.1                  | 53        | 91.7       |
| <b>17{6}</b> | 417.2512       | 417.2518  | 70.0                  | 62        | 100.0      |

### 4. Characterization for representative library examples

**Amine 9b{2}**

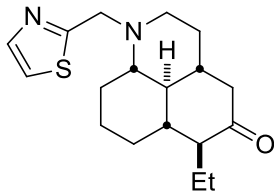

$\delta_{\text{H}}$  (500 MHz,  $\text{CDCl}_3$ ) 7.72 (d,  $J = 3.3$  Hz, 1H), 7.26 (d,  $J = 3.3$  Hz, 1H), 4.23 (d,  $J = 15.8$  Hz, 1H), 3.94 (d,  $J = 15.8$  Hz, 1H), 3.05 – 2.93 (m, 1H), 2.53 – 2.40 (m, 1H), 2.34 (dd,  $J = 13.1, 3.3$  Hz, 1H), 2.30 – 2.20 (m, 1H), 2.20 – 2.10 (m, 1H), 2.10 – 1.99 (m, 2H), 1.99 – 1.91 (m, 1H), 1.91 – 1.82 (m, 1H), 1.70 – 1.45 (m, 5H), 1.40 – 1.14 (m, 4H), 1.05 (qd,  $J = 13.0, 3.6$  Hz, 1H), 0.84 (t,  $J = 7.4$  Hz, 3H);  $\delta_{\text{C}}$  (125 MHz,  $\text{CDCl}_3$ ) 210.7 (C), 170.7 (C), 142.4 (CH), 119.1 (CH), 64.3 (CH), 56.1 (CH), 54.3 ( $\text{CH}_2$ ), 53.9 ( $\text{CH}_2$ ), 50.9 (CH), 48.7 ( $\text{CH}_2$ ), 44.4 (CH), 41.3 (CH), 33.2 ( $\text{CH}_2$ ), 31.4 ( $\text{CH}_2$ ), 30.3 ( $\text{CH}_2$ ), 24.4 ( $\text{CH}_2$ ), 17.9 ( $\text{CH}_2$ ), 11.1 ( $\text{CH}_3$ );  $m/z$  (ESI+) found  $[\text{M}+\text{H}]^+$  319.1847.  $\text{C}_{18}\text{H}_{27}\text{N}_2\text{OS}^+$  requires 319.1839.

**Amine 9c{1}**

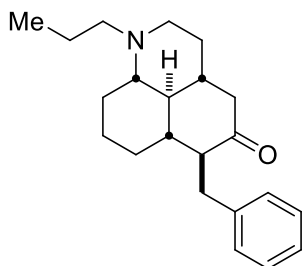

$\delta_{\text{H}}$  (500 MHz,  $\text{CDCl}_3$ ) 7.26 – 7.11 (m, 5H), 3.08 (dd,  $J = 14.2, 8.1$  Hz, 1H), 2.97 – 2.92 (m, 1H), 2.80 (dd,  $J = 14.2, 2.6$  Hz, 1H), 2.69 – 2.61 (m, 1H), 2.52 – 2.45 (m, 1H), 2.45 – 2.38 (m, 1H), 2.38 – 2.28 (m, 2H), 2.17 – 2.10 (m, 3H), 1.92 – 1.86 (m, 2H), 1.66 – 1.61 (m, 1H), 1.52 – 1.41 (m, 4H), 1.37 – 1.07 (m, 5H), 0.85 (t,  $J = 7.4$  Hz, 3H);  $\delta_{\text{C}}$  (125 MHz,  $\text{CDCl}_3$ ) 210.1 (C), 141.6 (C), 129.3 (CH), 128.2 (CH), 125.6 (CH), 63.8 (CH), 57.8 (CH), 55.2 ( $\text{CH}_2$ ), 52.5 ( $\text{CH}_2$ ), 51.2 (CH), 48.9 ( $\text{CH}_2$ ), 46.5 (CH), 41.6 (CH), 33.4 ( $\text{CH}_2$ ), 32.0 ( $\text{CH}_2$ ), 31.2 ( $\text{CH}_2$ ), 30.0 ( $\text{CH}_2$ ), 24.6 ( $\text{CH}_2$ ), 17.4 ( $\text{CH}_2$ ), 12.0 ( $\text{CH}_3$ );  $m/z$  (ESI+) found  $[\text{M}+\text{H}]^+$  326.2516.  $\text{C}_{22}\text{H}_{32}\text{NO}^+$  requires 326.2478.

**Amine 9c{2}**

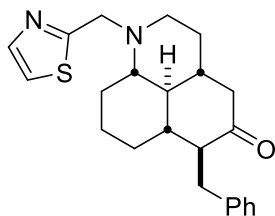

$\delta_{\text{H}}$  (400 MHz,  $\text{CDCl}_3$ ) 7.72 (d,  $J = 3.3$  Hz, 1H), 7.28 – 7.12 (m, 6H), 4.23 (d,  $J = 15.8$  Hz, 1H), 3.94 (d,  $J = 15.4$  Hz, 1H), 3.08 (dd,  $J = 14.2, 8.1$  Hz, 1H), 3.03 – 2.95 (m, 1H), 2.82 (dd,  $J = 14.2, 2.6$  Hz, 1H), 2.51 – 2.40 (m, 2H), 2.37 (dd,  $J = 12.9, 3.2$  Hz, 1H), 2.29 – 2.23 (m, 1H), 2.20 – 2.01 (m, 3H), 1.94 – 1.87 (m, 1H), 1.67 – 1.61 (m, 1H), 1.57 – 1.42 (m, 2H), 1.40 – 1.20 (m, 4H), 1.19 – 1.08 (m, 1H);  $\delta_{\text{C}}$  (100 MHz,  $\text{CDCl}_3$ ) 209.8 (C), 170.9 (C), 142.5 (CH), 141.4 (C), 129.3 (CH), 128.2 (CH), 125.7 (CH), 119.1 (CH), 64.2 (CH), 57.7 (CH), 54.4 (CH<sub>2</sub>), 53.9 (CH<sub>2</sub>), 51.2 (CH), 48.7 (CH<sub>2</sub>), 46.2 (CH), 41.3 (CH), 33.3 (CH<sub>2</sub>), 32.0 (CH<sub>2</sub>), 31.2 (CH<sub>2</sub>), 30.4 (CH<sub>2</sub>), 24.4 (CH<sub>2</sub>);  $m/z$  (ESI+) found  $[\text{M}+\text{H}]^+$  381.2039.  $\text{C}_{23}\text{H}_{29}\text{N}_2\text{OS}^+$  requires 381.1995.

#### Amine **9d**{1}

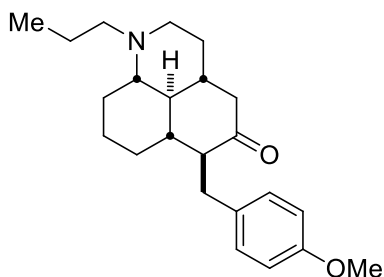

$\delta_{\text{H}}$  (500 MHz,  $\text{CDCl}_3$ ) 7.15 – 7.10 (m, 2H), 6.80 – 6.76 (m, 2H), 3.77 (s, 3H), 3.01 – 2.91 (m, 2H), 2.78 (dd,  $J = 14.2, 2.5$  Hz, 1H), 2.70 – 2.61 (m, 1H), 2.54 – 2.44 (m, 1H), 2.39 – 2.27 (m, 3H), 2.17 – 2.08 (m, 3H), 1.93 – 1.85 (m, 2H), 1.67 – 1.60 (m, 1H), 1.54 – 1.38 (m, 4H), 1.36 – 1.05 (m, 5H), 0.85 (t,  $J = 7.4$  Hz, 3H);  $\delta_{\text{C}}$  (125 MHz,  $\text{CDCl}_3$ ) 210.2 (C), 157.6 (C), 133.4 (C), 130.3 (CH), 113.5 (CH), 63.8 (CH), 57.9 (CH), 55.21 (CH<sub>3</sub>), 55.18 (CH<sub>2</sub>), 52.5 (CH<sub>2</sub>), 51.1 (CH), 48.9 (CH<sub>2</sub>), 46.2 (CH), 41.5 (CH), 33.3 (CH<sub>2</sub>), 31.9 (CH<sub>2</sub>), 30.2 (CH<sub>2</sub>), 30.0 (CH<sub>2</sub>), 24.6 (CH<sub>2</sub>), 17.4 (CH<sub>2</sub>), 12.0 (CH<sub>3</sub>);  $m/z$  (ESI+) found  $[\text{M}+\text{H}]^+$  356.2596.  $\text{C}_{23}\text{H}_{34}\text{NO}_2^+$  requires 356.2584.

#### Amine **9d**{4}

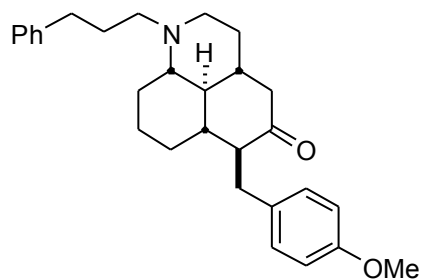

$\delta_{\text{H}}$  (500 MHz,  $\text{CDCl}_3$ ) 7.32 – 7.28 (m, 2H), 7.23 – 7.18 (m, 3H), 7.15 – 7.12 (m, 2H), 6.81 – 6.77 (m, 2H), 3.78 (s, 3H), 3.01 – 2.95 (m, 2H), 2.84 – 2.77 (m, 2H), 2.65 – 2.53 (m, 3H), 2.40 – 2.32 (m, 3H), 2.18 – 2.04 (m, 3H), 1.97 – 1.74 (m, 4H), 1.67 – 1.62 (m, 1H), 1.61 – 1.41 (m, 2H), 1.39 – 1.08 (m, 5H);  $\delta_{\text{C}}$  (125 MHz,  $\text{CDCl}_3$ ) 210.1 (C), 157.6 (C), 141.9 (C), 133.3 (C), 130.3 (CH), 128.4 (CH), 128.3 (CH), 125.9 (CH), 113.5 (CH), 63.9 (CH), 57.8 (CH), 55.2 ( $\text{CH}_3$ ), 52.5 ( $\text{CH}_2$ ), 52.4 ( $\text{CH}_2$ ), 50.8 (CH), 48.7 ( $\text{CH}_2$ ), 46.1 (CH), 41.3 (CH), 33.8 ( $\text{CH}_2$ ), 33.0 ( $\text{CH}_2$ ), 31.8 ( $\text{CH}_2$ ), 30.2 ( $\text{CH}_2$ ), 29.7 ( $\text{CH}_2$ ), 26.0 ( $\text{CH}_2$ ), 24.5 ( $\text{CH}_2$ );  $m/z$  (ESI+) found  $[\text{M}+\text{H}]^+$  432.2902.  $\text{C}_{29}\text{H}_{38}\text{NO}_2^+$  requires 432.2897.

#### Amine **9d**{6}

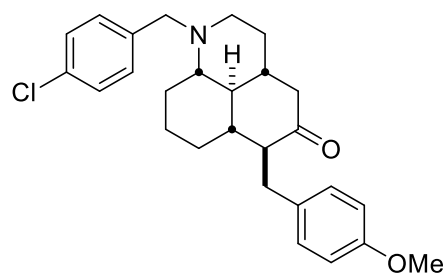

$\delta_{\text{H}}$  (500 MHz,  $\text{CDCl}_3$ ) 7.29 – 7.23 (m, 4H), 7.15 – 7.12 (m, 2H), 6.81 – 6.77 (m, 2H), 4.09 (d,  $J = 13.7$  Hz, 1H), 3.78 (s, 3H), 3.16 (d,  $J = 13.5$  Hz, 1H), 2.98 (dd,  $J = 14.2, 8.1$  Hz, 1H), 2.84 – 2.77 (m, 2H), 2.41 – 2.31 (m, 2H), 2.29 – 2.23 (m, 1H), 2.19 – 2.10 (m, 2H), 2.06 – 2.00 (m, 1H), 1.95 – 1.87 (m, 2H), 1.57 – 1.52 (m, 1H), 1.50 – 1.10 (m, 7H);  $\delta_{\text{C}}$  (125 MHz,  $\text{CDCl}_3$ ) 210.1 (C), 157.6 (C), 138.1 (C), 132.4 (C), 133.4 (C), 130.3 (CH), 130.2 (CH), 128.3 (CH), 113.5 (CH), 65.2 (CH), 57.9 (CH), 56.7 ( $\text{CH}_2$ ), 55.2 ( $\text{CH}_3$ ), 52.9 ( $\text{CH}_2$ ), 51.1 (CH), 48.8 ( $\text{CH}_2$ ), 46.1 (CH), 41.5 (CH), 33.0 ( $\text{CH}_2$ ), 32.0 ( $\text{CH}_2$ ), 30.6 ( $\text{CH}_2$ ), 30.3 ( $\text{CH}_2$ ), 24.5 ( $\text{CH}_2$ );  $m/z$  (ESI+) found  $[\text{M}+\text{H}]^+$  438.2191.  $\text{C}_{27}\text{H}_{33}\text{ClNO}_2^+$  requires 438.2194.

#### Amide **11b**{1}



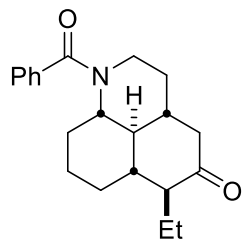

$\delta_{\text{H}}$  (500 MHz,  $\text{CDCl}_3$ ) 7.43 – 7.35 (m, 5H), 3.56 – 3.46 (m, 2H), 3.41 (ddd,  $J = 13.9, 6.1, 4.1$  Hz, 1H), 2.46 (dd,  $J = 13.1, 4.4$  Hz, 1H), 2.31 – 2.24 (m, 1H), 2.17 – 2.06 (m, 2H), 2.03 – 1.98 (m, 1H), 1.95 – 1.86 (m, 2H), 1.82 – 1.52 (m, 5H), 1.51 – 1.33 (m, 2H), 1.26 – 1.19 (m, 1H), 1.18 – 1.08 (m, 1H), 0.86 (t,  $J = 7.4$  Hz, 3H);  $\delta_{\text{C}}$  (125 MHz,  $\text{CDCl}_3$ ) 210.0 (C), 171.7 (C), 137.2 (C), 129.6 (CH), 128.5 (CH), 126.9 (CH), 60.2 (CH), 55.9 (CH), 49.0 ( $\text{CH}_2$ ), 46.4 (CH), 45.7 (CH), 43.0 ( $\text{CH}_2$ ), 37.0 (CH), 32.1 ( $\text{CH}_2$ ), 31.4 ( $\text{CH}_2$ ), 29.7 ( $\text{CH}_2$ ), 24.7 ( $\text{CH}_2$ ), 17.9 ( $\text{CH}_2$ ), 11.3 ( $\text{CH}_3$ );  $m/z$  (ESI+) found  $[\text{M}+\text{H}]^+$  326.2130.  $\text{C}_{21}\text{H}_{28}\text{NO}_2^+$  requires 326.2115.

#### Amide **11b**{4}

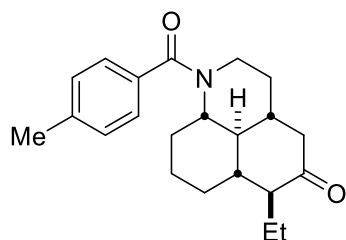

$\delta_{\text{H}}$  (500 MHz,  $\text{CDCl}_3$ ) 7.30 (d,  $J = 7.8$  Hz, 2H), 7.18 (d,  $J = 7.8$  Hz, 2H), 3.54 – 3.46 (m, 2H), 3.43 (ddd,  $J = 13.8, 6.1, 4.3$  Hz, 1H), 2.45 (dd,  $J = 13.1, 4.4$  Hz, 1H), 2.36 (s, 3H), 2.28 – 2.23 (m, 1H), 2.17 – 2.06 (m, 2H), 2.03 – 1.97 (m, 1H), 1.94 – 1.85 (m, 2H), 1.81 – 1.51 (m, 5H), 1.50 – 1.33 (m, 2H), 1.25 – 1.18 (m, 1H), 1.17 – 1.08 (m, 1H), 0.86 (t,  $J = 7.4$  Hz, 3H);  $\delta_{\text{C}}$  (125 MHz,  $\text{CDCl}_3$ ) 210.1 (C), 172.0 (C), 139.7 (C), 134.3 (C), 129.0 (CH), 127.0 (CH), 60.2 (CH), 55.9 (CH), 49.0 ( $\text{CH}_2$ ), 46.4 (CH), 45.7 (CH), 43.3 ( $\text{CH}_2$ ), 37.1 (CH), 32.2 ( $\text{CH}_2$ ), 31.4 ( $\text{CH}_2$ ), 29.7 ( $\text{CH}_2$ ), 24.7 ( $\text{CH}_2$ ), 21.4 ( $\text{CH}_3$ ), 17.9 ( $\text{CH}_2$ ), 11.3 ( $\text{CH}_3$ );  $m/z$  (ESI+) found  $[\text{M}+\text{H}]^+$  340.2284.  $\text{C}_{22}\text{H}_{30}\text{NO}_2^+$  requires 340.2271.

#### Amide **11c**{8}

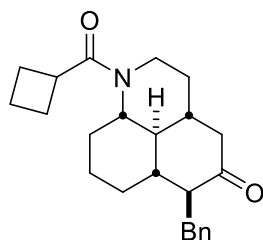

$\delta_{\text{H}}$  (500 MHz,  $\text{CDCl}_3$ ) 7.26 – 7.12 (m, 5H), 3.56 – 3.38 (m, 2H), 3.30 – 3.16 (m, 2H), 3.05 (dd,  $J = 14.2, 8.5$  Hz, 1H), 2.76 (dd,  $J = 14.2, 2.6$  Hz, 1H), 2.51 – 2.44 (m, 2H), 2.38 – 2.27 (m, 2H), 2.22 – 2.07 (m, 5H), 2.06 – 1.80 (m, 4H), 1.75 – 1.64 (m, 1H), 1.61 – 1.33 (m, 4H), 1.29 – 1.13 (m, 2H);  $\delta_{\text{C}}$  (125 MHz,  $\text{CDCl}_3$ ) 209.3 (C), 173.8 (C), 141.2 (C), 129.2 (CH), 128.2 (CH), 125.8 (CH), 59.3 (CH), 57.3 (CH), 49.1 ( $\text{CH}_2$ ), 47.4 (CH), 46.4 (CH), 37.8 (CH), 35.9 (CH), 32.3 ( $\text{CH}_2$ ), 31.7 ( $\text{CH}_2$ ), 31.1 ( $\text{CH}_2$ ), 30.2 ( $\text{CH}_2$ ), 25.3 ( $\text{CH}_2$ ), 25.1 ( $\text{CH}_2$ ), 24.5 ( $\text{CH}_2$ ), 18.0 ( $\text{CH}_2$ );  $m/z$  (ESI+) found  $[\text{M}+\text{H}]^+$  366.2454.  $\text{C}_{24}\text{H}_{32}\text{NO}_2^+$  requires 366.2428.

Amide **11c**{10}

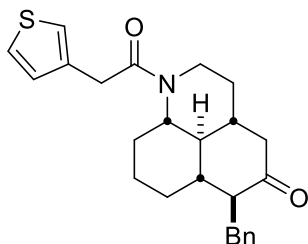

$\delta_{\text{H}}$  (500 MHz,  $\text{CDCl}_3$ ) 7.29 – 7.27 (m, 1H), 7.25 – 7.21 (m, 2H), 7.19 – 7.12 (m, 3H), 7.05 – 7.03 (m, 1H), 6.99 (dd,  $J = 4.9, 1.3$  Hz, 1H), 3.69 (s, 1H), 3.64 (br s, 1H), 3.52 – 3.45 (m, 1H), 3.30 – 3.21 (m, 1H), 3.04 (dd,  $J = 14.2, 8.5$  Hz, 1H), 2.75 (dd,  $J = 14.2, 2.6$  Hz, 1H), 2.49 – 2.41 (m, 2H), 2.22 – 2.15 (m, 2H), 2.08 (t,  $J = 12.3$  Hz, 2H), 1.93 – 1.86 (m, 1H), 1.84 – 1.73 (m, 1H), 1.67 – 1.31 (m, 5H), 1.22 – 1.12 (m, 2H);  $\delta_{\text{C}}$  (125 MHz,  $\text{CDCl}_3$ ) 209.2 (C), 169.8 (C), 141.2 (C), 135.1 (C), 129.2 (CH), 128.2 (CH), 128.0 (CH), 126.0 (CH), 125.8 (CH), 121.7 (CH), 59.4 (CH), 57.1 (CH), 48.9 ( $\text{CH}_2$ ), 47.4 (CH), 46.3 (CH), 39.0 ( $\text{CH}_2$ ), 36.7 ( $\text{CH}_2$ ), 35.7 (CH), 32.2 ( $\text{CH}_2$ ), 31.2 ( $\text{CH}_2$ ), 31.1 ( $\text{CH}_2$ ), 30.1 ( $\text{CH}_2$ ), 24.5 ( $\text{CH}_2$ );  $m/z$  (ESI+) found  $[\text{M}+\text{H}]^+$  408.2026.  $\text{C}_{25}\text{H}_{30}\text{NO}_2\text{S}^+$  requires 408.1992.

Amide **11d**{7}

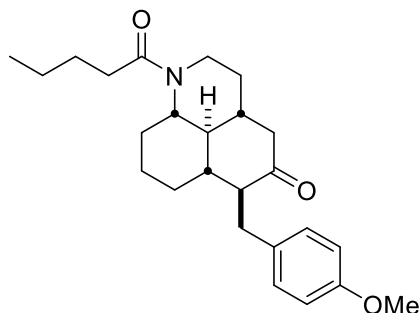

$\delta_{\text{H}}$  (500 MHz,  $\text{CDCl}_3$ ) 7.13 – 7.09 (m, 2H), 6.80 – 6.76 (m, 2H), 3.76 (s, 3H), 3.76 – 3.67 (m, 1H), 3.44 (dt,  $J = 10.7, 5.5$  Hz, 1H), 3.31 – 3.21 (m, 1H), 2.96 (dd,  $J = 14.2, 8.5$  Hz, 1H), 2.73 (dd,  $J = 14.2, 2.5$  Hz, 1H), 2.48 (dd,  $J = 12.8, 4.6$  Hz, 1H), 2.42 (ddd,  $J = 11.0, 8.6, 2.0$  Hz, 1H), 2.34 – 2.16 (m, 3H), 2.15 – 2.03 (m, 3H), 1.91 – 1.85 (m, 1H), 1.75 – 1.65 (m, 1H), 1.63 – 1.55 (m, 3H), 1.54 – 1.24 (m, 6H), 1.23 – 1.13 (m, 1H),

0.92 (t,  $J = 7.4$  Hz, 3H);  $\delta_C$  (125 MHz,  $CDCl_3$ ) 209.5 (C), 172.4 (C), 157.7 (C), 133.1 (C), 130.2 (CH), 113.6 (CH), 59.3 (CH), 57.4 (CH), 55.2 (CH<sub>3</sub>), 49.1 (CH<sub>2</sub>), 47.2 (CH), 46.4 (CH), 38.1 (CH<sub>2</sub>), 35.7 (CH), 33.6 (CH<sub>2</sub>), 32.3 (CH<sub>2</sub>), 31.5 (CH<sub>2</sub>), 30.4 (CH<sub>2</sub>), 30.1 (CH<sub>2</sub>), 27.6 (CH<sub>2</sub>), 24.5 (CH<sub>2</sub>), 22.6 (CH<sub>2</sub>), 14.0 (CH<sub>3</sub>);  $m/z$  (ESI+) found  $[M+H]^+$  398.2692.  $C_{25}H_{36}NO_3^+$  requires 398.2690.

#### Sulfonamide **13b**{12}

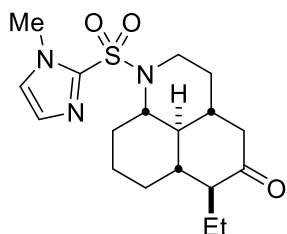

$\delta_H$  (500 MHz,  $CDCl_3$ ) 7.46 (d,  $J = 1.2$  Hz, 1H), 7.39 (d,  $J = 1.2$  Hz, 1H), 4.15 (dt,  $J = 13.1, 3.9$  Hz, 1H), 3.75 (s, 3H), 2.97 – 2.91 (m, 1H), 2.70 (ddd,  $J = 11.8, 9.5, 3.8$  Hz, 1H), 2.47 – 2.42 (m, 1H), 2.33 (dd,  $J = 13.4, 3.1$  Hz, 1H), 2.17 – 2.10 (m, 1H), 2.07 – 2.02 (m, 1H), 1.90 – 1.82 (m, 2H), 1.80 – 1.61 (m, 3H), 1.57 – 1.42 (m, 4H), 1.31 – 1.14 (m, 2H), 1.07 – 0.98 (m, 1H), 0.80 (t,  $J = 7.4$  Hz, 3H);  $\delta_C$  (125 MHz,  $CDCl_3$ ) 210.0 (C), 140.9 (C), 138.8 (CH), 123.6 (CH), 63.6 (CH), 55.8 (CH), 49.8 (CH), 48.6 (CH<sub>2</sub>), 48.5 (CH<sub>2</sub>), 44.8 (CH), 40.9 (CH), 34.1 (CH<sub>3</sub>), 32.8 (CH<sub>2</sub>), 31.0 (CH<sub>2</sub>), 30.6 (CH<sub>2</sub>), 24.8 (CH<sub>2</sub>), 17.8 (CH<sub>2</sub>), 10.9 (CH<sub>3</sub>);  $m/z$  (ESI+) found  $[M+H]^+$  366.1856.  $C_{18}H_{28}N_3O_3S^+$  requires 366.1846.

#### Sulfonamide **13b**{11}

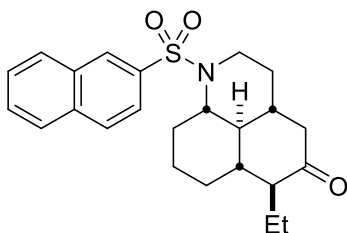

$\delta_H$  (500 MHz,  $CDCl_3$ ) 8.38 – 8.36 (m, 1H), 7.99 – 7.95 (m, 2H), 7.92 (d,  $J = 8.1$  Hz, 1H), 7.77 (dd,  $J = 8.7, 1.9$  Hz, 1H), 7.67 – 7.60 (m, 2H), 4.35 (dt,  $J = 13.0, 3.7$  Hz, 1H), 2.96 – 2.89 (m, 1H), 2.73 – 2.67 (m, 1H), 2.36 (dd,  $J = 13.5, 3.4$  Hz, 1H), 2.20 – 2.13 (m, 2H), 2.09 – 2.03 (m, 1H), 1.88 – 1.73 (m, 4H), 1.70 – 1.46 (m, 5H), 1.29 – 1.22 (m, 1H), 1.17 – 0.98 (m, 2H), 0.81 (t,  $J = 7.4$  Hz, 3H);  $\delta_C$  (125 MHz,  $CDCl_3$ ) 209.6 (C), 138.4 (C), 134.7 (C), 132.2 (C), 129.3 (CH), 129.2 (CH), 128.7 (CH), 128.0 (CH), 127.9 (CH), 127.5 (CH), 122.4 (CH), 63.8 (CH), 55.9 (CH), 49.8 (CH), 48.7 (CH<sub>2</sub>), 48.5 (CH<sub>2</sub>), 44.8 (CH), 41.2 (CH), 33.2 (CH<sub>2</sub>), 30.7 (CH<sub>2</sub>), 30.5 (CH<sub>2</sub>), 24.8 (CH<sub>2</sub>), 17.8 (CH<sub>2</sub>), 10.9 (CH<sub>3</sub>);  $m/z$  (ESI+) found  $[M+H]^+$  412.1971.  $C_{24}H_{30}NO_3S^+$  requires 412.1941.

Sulfonamide **13c**{3}

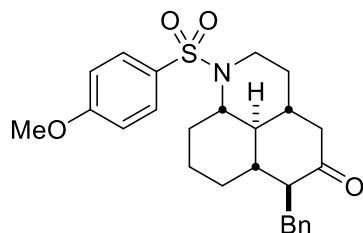

$\delta_H$  (500 MHz,  $CDCl_3$ ) 7.73 – 7.69 (m, 2H), 7.24 – 7.20 (m, 2H), 7.18 – 7.11 (m, 3H), 6.98 – 6.94 (m, 2H), 4.20 (dt,  $J = 12.9, 3.8$  Hz, 1H), 3.87 (s, 3H), 3.01 (dd,  $J = 14.3, 7.9$  Hz, 1H), 2.84 – 2.76 (m, 2H), 2.57 (ddd,  $J = 11.9, 9.7, 3.7$  Hz, 1H), 2.45 (ddd,  $J = 10.8, 8.0, 2.3$  Hz, 1H), 2.37 (dd,  $J = 13.3, 3.4$  Hz, 1H), 2.20 – 2.13 (m, 2H), 2.07 – 2.03 (m, 1H), 1.86 – 1.81 (m, 1H), 1.75 – 1.66 (m, 2H), 1.57 – 1.43 (m, 3H), 1.29 – 1.21 (m, 1H), 1.18 – 1.05 (m, 2H);  $\delta_C$  (125 MHz,  $CDCl_3$ ) 208.9 (C), 162.6 (C), 141.0 (C), 132.5 (C), 129.2 (CH), 129.1 (CH), 128.2 (CH), 125.8 (CH), 114.2 (CH), 63.4 (CH), 57.4 (CH), 55.6 (CH<sub>3</sub>), 49.9 (CH), 48.4 (CH<sub>2</sub>), 48.2 (CH<sub>2</sub>), 46.4 (CH), 41.0 (CH), 32.9 (CH<sub>2</sub>), 31.1 (CH<sub>2</sub>), 31.1 (CH<sub>2</sub>), 30.9 (CH<sub>2</sub>), 24.7 (CH<sub>2</sub>);  $m/z$  (ESI+) found  $[M+H]^+$  454.2046.  $C_{26}H_{32}NO_4S^+$  requires 454.2047.

Sulfonamide **13c**{5}

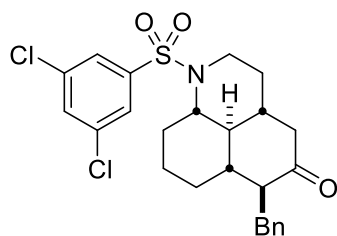

$\delta_H$  (500 MHz,  $CDCl_3$ ) 7.65 (d,  $J = 1.8$  Hz, 2H), 7.54 (t,  $J = 1.8$  Hz, 1H), 7.26 – 7.22 (m, 2H), 7.19 – 7.13 (m, 3H), 4.24 (dt,  $J = 13.2, 3.6$  Hz, 1H), 3.03 (dd,  $J = 14.3, 7.9$  Hz, 1H), 2.94 – 2.83 (m, 2H), 2.76 (ddd,  $J = 13.0, 9.4, 3.7$  Hz, 1H), 2.48 (ddd,  $J = 10.9, 7.9, 2.4$  Hz, 1H), 2.42 (dd,  $J = 13.4, 2.7$  Hz, 1H), 2.25 – 2.17 (m, 1H), 2.11 – 2.05 (m, 1H), 1.98 – 1.92 (m, 1H), 1.90 – 1.75 (m, 3H), 1.65 – 1.52 (m, 3H), 1.33 – 1.25 (m, 1H), 1.21 – 1.07 (m, 2H);  $\delta_C$  (125 MHz,  $CDCl_3$ ) 208.5 (C), 144.7 (C), 140.9 (C), 136.0 (C), 132.4 (CH), 129.2 (CH), 128.2 (CH), 125.8 (CH), 125.2 (CH), 63.8 (CH), 57.3 (CH), 49.8 (CH), 48.8 (CH<sub>2</sub>), 48.3 (CH<sub>2</sub>), 46.3 (CH), 41.0 (CH), 33.2 (CH<sub>2</sub>), 31.1 (CH<sub>2</sub>), 30.9 (CH<sub>2</sub>), 30.4 (CH<sub>2</sub>), 24.7 (CH<sub>2</sub>);  $m/z$  (ESI+) found  $[M+H]^+$  492.1176.  $C_{25}H_{28}Cl_2NO_3S^+$  requires 492.1161.

Sulfonamide **13d**{2}

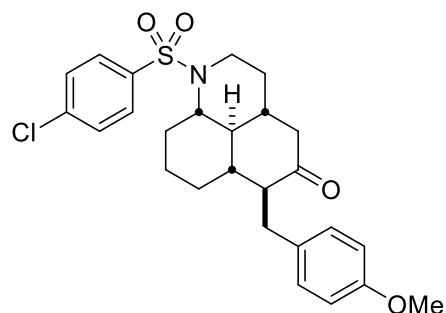

$\delta_H$  (500 MHz,  $CDCl_3$ ) 7.74 – 7.70 (m, 2H), 7.49 – 7.46 (m, 2H), 7.11 – 7.07 (m, 2H), 6.79 – 6.75 (m, 2H), 4.23 (dt,  $J = 13.0, 3.6$  Hz, 1H), 3.76 (s, 3H), 2.92 (dd,  $J = 14.3, 7.8$  Hz, 1H), 2.86 – 2.79 (m, 2H), 2.67 – 2.60 (m, 1H), 2.43 – 2.36 (m, 2H), 2.20 – 2.14 (m, 1H), 2.08 – 2.02 (m, 2H), 1.88 – 1.79 (m, 1H), 1.78 – 1.69 (m, 2H), 1.59 – 1.45 (m, 3H), 1.28 – 1.20 (m, 1H), 1.18 – 1.04 (m, 2H);  $\delta_C$  (125 MHz,  $CDCl_3$ ) 208.9 (C), 157.7 (C), 139.9 (C), 138.9 (C), 132.8 (C), 130.2 (CH), 129.4 (CH), 128.4 (CH), 113.6 (CH), 63.6 (CH), 57.5 (CH), 55.2 (CH<sub>3</sub>), 49.8 (CH), 48.5 (CH<sub>2</sub>), 48.4 (CH<sub>2</sub>), 46.0 (CH), 40.9 (CH), 33.0 (CH<sub>2</sub>), 31.0 (CH<sub>2</sub>), 30.7 (CH<sub>2</sub>), 30.1 (CH<sub>2</sub>), 24.7 (CH<sub>2</sub>);  $m/z$  (ESI+) found  $[M+H]^+$  488.1643.  $C_{26}H_{31}ClNO_4S^+$  requires 488.1657.

#### Indolenine **15**{1}

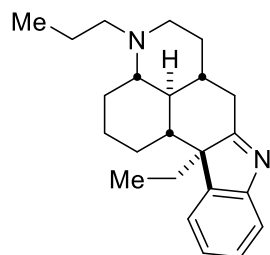

$\delta_H$  (500 MHz,  $CDCl_3$ ) 7.64 (d,  $J = 7.7$  Hz, 1H), 7.32 (td,  $J = 7.6, 1.4$  Hz, 1H), 7.25 – 7.16 (m, 2H), 3.37 (d,  $J = 11.4$  Hz, 1H), 2.98 – 2.63 (m, 4H), 2.36 (td,  $J = 11.5, 3.2$  Hz, 1H), 2.30 – 2.14 (m, 3H), 2.11 – 1.94 (m, 2H), 1.94 – 1.74 (m, 4H), 1.73 – 1.35 (m, 5H), 1.26 (h,  $J = 14.3, 13.2$  Hz, 1H), 1.11 – 1.00 (m, 1H), 0.95 (t,  $J = 7.3$  Hz, 3H), 0.37 (q,  $J = 8.2, 7.8$  Hz, 3H);  $\delta_C$  (125 MHz,  $CDCl_3$ ) 188.5 (C), 155.0 (C), 144.0 (C), 127.8 (CH), 125.1 (CH), 121.4 (CH), 120.5 (CH), 64.5 (CH), 58.3 (C), 53.3 (CH<sub>2</sub>, br), 51.9 (CH<sub>2</sub>, br), 51.5 (CH, br), 42.7 (CH<sub>2</sub>), 41.6 (CH), 35.0 (CH), 29.6 (CH<sub>2</sub>, br), 28.1 (CH<sub>2</sub>), 27.9 (CH<sub>2</sub>), 26.1 (CH<sub>2</sub>), 23.6 (CH<sub>2</sub>), 16.3 (CH<sub>2</sub>), 11.5 (CH<sub>3</sub>), 8.0 (CH<sub>3</sub>);  $m/z$  (ESI+) found  $[M+H]^+$  337.2645.  $C_{23}H_{33}N_2^+$  requires 337.2638.

#### Quinoline **17**{6}

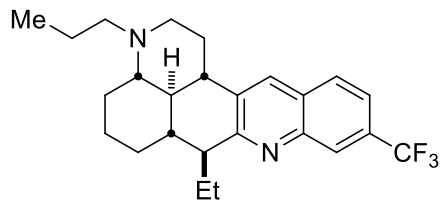

$\delta_{\text{H}}$  (500 MHz,  $\text{CDCl}_3$ ) 8.31 (s, 1H), 7.94 (s, 1H), 7.85 (d,  $J = 8.5$  Hz, 1H), 7.61 (dd,  $J = 8.5, 1.5$  Hz, 1H), 3.23 – 3.17 (m, 1H), 2.91 – 2.86 (m, 1H), 2.73 (dt,  $J = 13.4, 7.8$  Hz, 1H), 2.60 – 2.47 (m, 4H), 2.34 – 2.26 (d, 1H), 2.20 – 2.11 (m, 2H), 2.09 – 2.03 (m, 1H), 1.95 – 1.82 (m, 2H), 1.75 – 1.59 (m, 2H), 1.56 – 1.43 (m, 3H), 1.29 – 1.11 (m, 3H), 0.89 (t,  $J = 7.3$  Hz, 3H), 0.73 (t,  $J = 7.4$  Hz, 3H);  $\delta_{\text{C}}$  (125 MHz,  $\text{CDCl}_3$ ) 163.3 (C), 145.6 (C), 136.9 (C), 130.6 (CH), 130.2 (C, q,  $J = 32$  Hz), 128.4 (CH), 128.2 (C), 126.4 (CH, q,  $J = 4.2$  Hz), 124.2 (C, q,  $J = 270$  Hz), 121.1 (CH, q,  $J = 3.1$  Hz), 65.4 (CH), 54.8 ( $\text{CH}_2$ ), 52.3 ( $\text{CH}_2$ ), 48.9 (CH), 47.0 (CH), 40.3 (CH), 39.4 (CH), 33.3 ( $\text{CH}_2$ ), 29.8 ( $\text{CH}_2$ ), 29.7 ( $\text{CH}_2$ ), 27.0 ( $\text{CH}_2$ ), 24.8 ( $\text{CH}_2$ ), 17.5 ( $\text{CH}_2$ ), 12.0 ( $\text{CH}_3$ ), 9.7 ( $\text{CH}_3$ );  $m/z$  (ESI+) found  $[\text{M}+\text{H}]^+$  417.2518.  $\text{C}_{25}\text{H}_{32}\text{F}_3\text{N}_2^+$  requires 417.2512.

#### Quinoline 17{5}

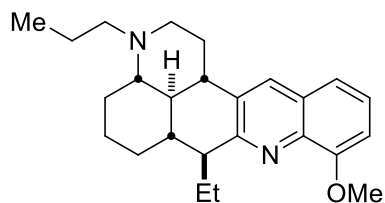

$\delta_{\text{H}}$  (500 MHz,  $\text{CDCl}_3$ ) 7.85 (s, 1H), 7.37 – 7.30 (m, 2H), 6.96 (d,  $J = 7.4$  Hz, 1H), 4.05 (s, 3H), 3.21 (d,  $J = 11.3$  Hz, 1H), 3.08 – 3.03 (m, 1H), 2.77 – 2.70 (m, 1H), 2.62 – 2.45 (m, 4H), 2.27 – 2.13 (m, 3H), 2.05 – 1.99 (m, 1H), 1.94 – 1.81 (m, 2H), 1.74 – 1.42 (m, 5H), 1.30 – 1.12 (m, 3H), 0.90 (t,  $J = 7.3$  Hz, 3H), 0.73 (t,  $J = 7.4$  Hz, 3H);  $\delta_{\text{C}}$  (125 MHz,  $\text{CDCl}_3$ ) 160.6 (C), 154.9 (C), 138.8 (C), 135.1 (C), 130.7 (CH), 127.9 (C), 125.5 (CH), 119.3 (CH), 106.9 (CH), 65.5 (CH), 56.1 ( $\text{CH}_3$ ), 54.7 ( $\text{CH}_2$ ), 52.3 ( $\text{CH}_2$ ), 48.5 (CH), 47.1 (CH), 40.7 (CH), 39.1 (CH), 33.4 ( $\text{CH}_2$ ), 29.7 ( $\text{CH}_2$ ), 28.1 ( $\text{CH}_2$ ), 25.0 ( $\text{CH}_2$ ), 17.5 ( $\text{CH}_2$ ), 12.0 ( $\text{CH}_3$ ), 9.8 ( $\text{CH}_3$ );  $m/z$  (ESI+) found  $[\text{M}+\text{H}]^+$  379.2762.  $\text{C}_{25}\text{H}_{35}\text{N}_2\text{O}^+$  requires 379.2744.

#### Quinoline 17{4}

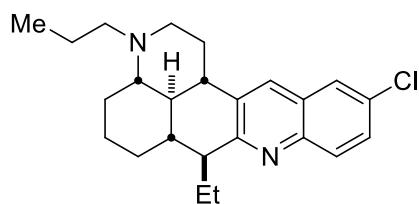

$\delta_{\text{H}}$  (500 MHz,  $\text{CDCl}_3$ ) 7.91 (d,  $J = 9.0$  Hz, 1H), 7.80 (s, 1H), 7.72 (s, 1H), 7.55 (d,  $J = 9.0$ , 1.5 Hz, 1H), 3.30 (d,  $J = 11.4$  Hz, 1H), 2.90 – 2.85 (m, 1H), 2.84 – 2.73 (m, 1H), 2.71 – 2.61 (m, 2H), 2.57 – 2.44 (m, 2H), 2.31 – 2.22 (m, 2H), 2.20 – 2.14 (m, 1H), 2.05 (d,  $J = 12.9$  Hz, 1H), 1.97 – 1.91 (m, 1H), 1.89 – 1.72 (m, 2H), 1.65 – 1.43 (m, 4H), 1.38 – 1.12 (m, 3H), 0.92 (t,  $J = 7.3$  Hz, 3H), 0.72 (t,  $J = 7.4$  Hz, 3H);  $\delta_{\text{C}}$  (125 MHz,  $\text{CDCl}_3$ ) 161.7 (C), 145.2 (C), 135.2 (C), 131.1 (C), 130.1 (CH), 130.0 (CH), 129.5 (CH), 127.3 (C), 125.9 (CH), 65.3 (CH), 54.2 ( $\text{CH}_2$ ), 51.9 ( $\text{CH}_2$ ), 48.7 (CH), 46.3 (CH), 40.5 (CH), 39.1 (CH), 33.1 ( $\text{CH}_2$ ), 29.2 ( $\text{CH}_2$ ), 29.1 ( $\text{CH}_2$ ), 27.1 ( $\text{CH}_2$ ), 24.8 ( $\text{CH}_2$ ), 17.1 ( $\text{CH}_2$ ), 11.9 ( $\text{CH}_3$ ), 9.7 ( $\text{CH}_3$ );  $m/z$  (ESI+) found  $[\text{M}+\text{H}]^+$  383.2255.  $\text{C}_{24}\text{H}_{32}\text{ClN}_2^+$  requires 383.2249.

## 5. Cheminformatic details

The structural and physiochemical properties for each of the prepared 95 library compounds and 4 scaffolds were determined as described in Table S1.

**Table S1.** Structural and physiochemical properties used in the cheminformatic analysis

| Parameter        | Description                                | Method of Determination |
|------------------|--------------------------------------------|-------------------------|
| MW               | molecular weight                           | chemdraw                |
| XLogP            | calc n-octanol/water partition coefficient | chemdraw                |
| HBD              | number of hydrogen bond donors             | chemdraw                |
| HBA              | number of hydrogen bond acceptors          | chemdraw                |
| RotB             | number of rotatable bonds                  | chemdraw                |
| tPSA             | topological polar surface area             | chemdraw                |
| Fsp <sup>3</sup> | fraction sp <sup>3</sup> carbon atoms      | manual inspection       |

The properties of these scaffolds and library compounds were then compared to Tan's dataset of 40 drugs, 20 commercial drug-like screening compounds, and 60 natural products<sup>4</sup>; and to our group's previously reported set of 20 alkaloid natural products<sup>nat chem</sup> (Table S2).

**Table S2.** Composition of reference set of drugs, commercial drug-like screening libraries, natural products and alkaloid natural products used in the cheminformatic analysis<sup>4+Nat. chem</sup>.

|                      | Compounds |          |         |          |
|----------------------|-----------|----------|---------|----------|
| Drugs (40 compounds) | Lipitor   | Lexapro  | Topamax | Coreg    |
|                      | Nexium    | Seroquel | Toprol  | Valtrex  |
|                      | Prevacid  | Protonix | Zetia   | Adderall |
|                      | Flonase   | Ambien   | Fosamax | Aciphex  |
|                      | Serevent  | Actos    | Abilify | Cymbalta |
|                      |           |          |         |          |

|                                                                             |                                                                                                                                                                                                                                           |                                                                                                                                                                                                                  |                                                                                                                                                                                                                  |                                                                                                                                                                                             |
|-----------------------------------------------------------------------------|-------------------------------------------------------------------------------------------------------------------------------------------------------------------------------------------------------------------------------------------|------------------------------------------------------------------------------------------------------------------------------------------------------------------------------------------------------------------|------------------------------------------------------------------------------------------------------------------------------------------------------------------------------------------------------------------|---------------------------------------------------------------------------------------------------------------------------------------------------------------------------------------------|
|                                                                             | Singulair<br>Effexor<br>Plavix<br>Zocor<br>Norvasc                                                                                                                                                                                        | Zoloft<br>Wellbutrin<br>Avandia<br>Risperdal<br>Zyprexa                                                                                                                                                          | Levaquin<br>Lamictal<br>Celebrex<br>Benazepril<br>Zyrtec                                                                                                                                                         | Crestor<br>Diovan<br>Tricor<br>Concerta<br>Imitrex                                                                                                                                          |
| <b>Commercial screening libraries</b> (20 compounds; pubchem compound CIDs) | <b>ChemBridge:</b><br>5771374<br>5771371<br><b>ChemDiv:</b><br>2474174<br>2471337                                                                                                                                                         | 5771429<br>5309772<br>5309762<br>2529482<br>1340935<br>2490059                                                                                                                                                   | 5309975<br>5309246<br>5309020<br>2474145<br>2490068<br>1342784                                                                                                                                                   | 5308431<br>5771496<br><br>2490046<br>2529498                                                                                                                                                |
| <b>Natural products</b> (60 compounds)                                      | cephamycin C<br>spergualin<br>forskolin<br>daptomycin<br>echinocandin B<br>calicheamicin g1<br>lipstatin<br>bleomycin<br>brefeldin A<br>cytochalasin B<br>epothilone A<br>apoptolidin<br>lactacystin<br>duocarmycin A<br>zaragozic acid A | mizoribine<br>SQ26180<br>thienamycin<br>validamycin<br>ivermectin B1a<br>cyclosporin A<br>geldanamycin<br>actinonin<br>discodermolide<br>monensin<br>calyculin A<br>amphotericin B<br>adriamycin<br>ginkgolide B | coformycin<br>arglabin<br>bestatin<br>midecamycin A1<br>taxol<br>pseudomonic acid A<br>trapoxin B<br>vincristine<br>colchicines<br>trichostatin<br>fumagillin<br>staurosporine<br>erythromycin A<br>streptomycin | compactin<br>artemisinin<br>plaunotol<br>rapamycin<br>FK506<br>talaromycin B<br>spongistatin 1<br>radicicol<br>salicylihalamide A<br>brevetoxin B<br>rifamycin B<br>quinine<br>mycobactin S |
| <b>Alkaloid Natural Products</b> (20 compounds)                             | neostenine<br>morphine<br>quinine<br>epibatidine<br>cocaine                                                                                                                                                                               | cylindricine C<br>harringtonine<br>monomorphine<br>physostigmine<br>tetracycline                                                                                                                                 | mesembrine<br>nicotine<br>halichlorine<br>pumiliotoxin A<br>yohimbine                                                                                                                                            | sparteine<br>atropine<br>strychnine<br>$\alpha$ -ergocryptine<br>galantamine                                                                                                                |



## 6. Copies of $^1\text{H}$ and $^{13}\text{C}$ spectra

### Scaffold 6a

MMC511F1F1.1.fid  
PROTON CDCl<sub>3</sub> /opt/topspin mmcleod 34

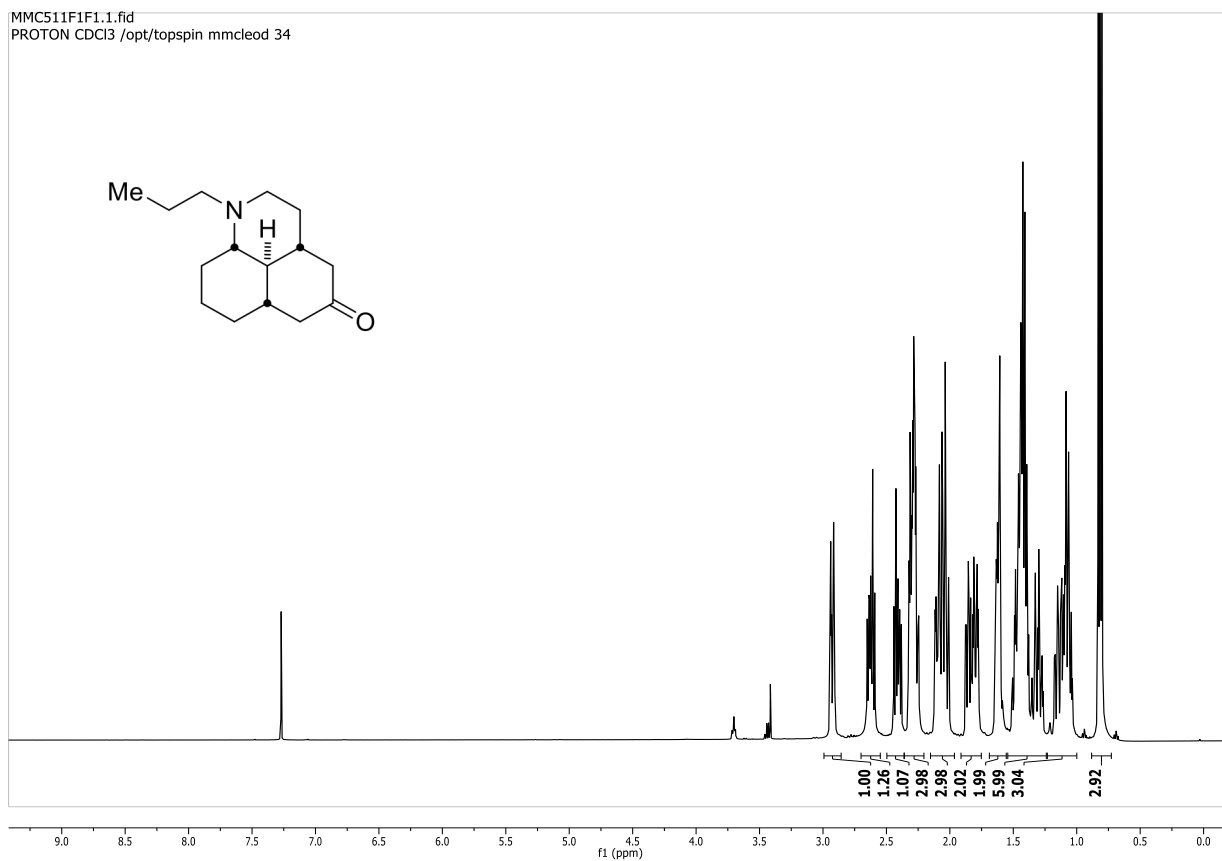

MMC511F1F1.2.1.1r  
C13CPD CDCl<sub>3</sub> /opt/topspin mmcleod 34

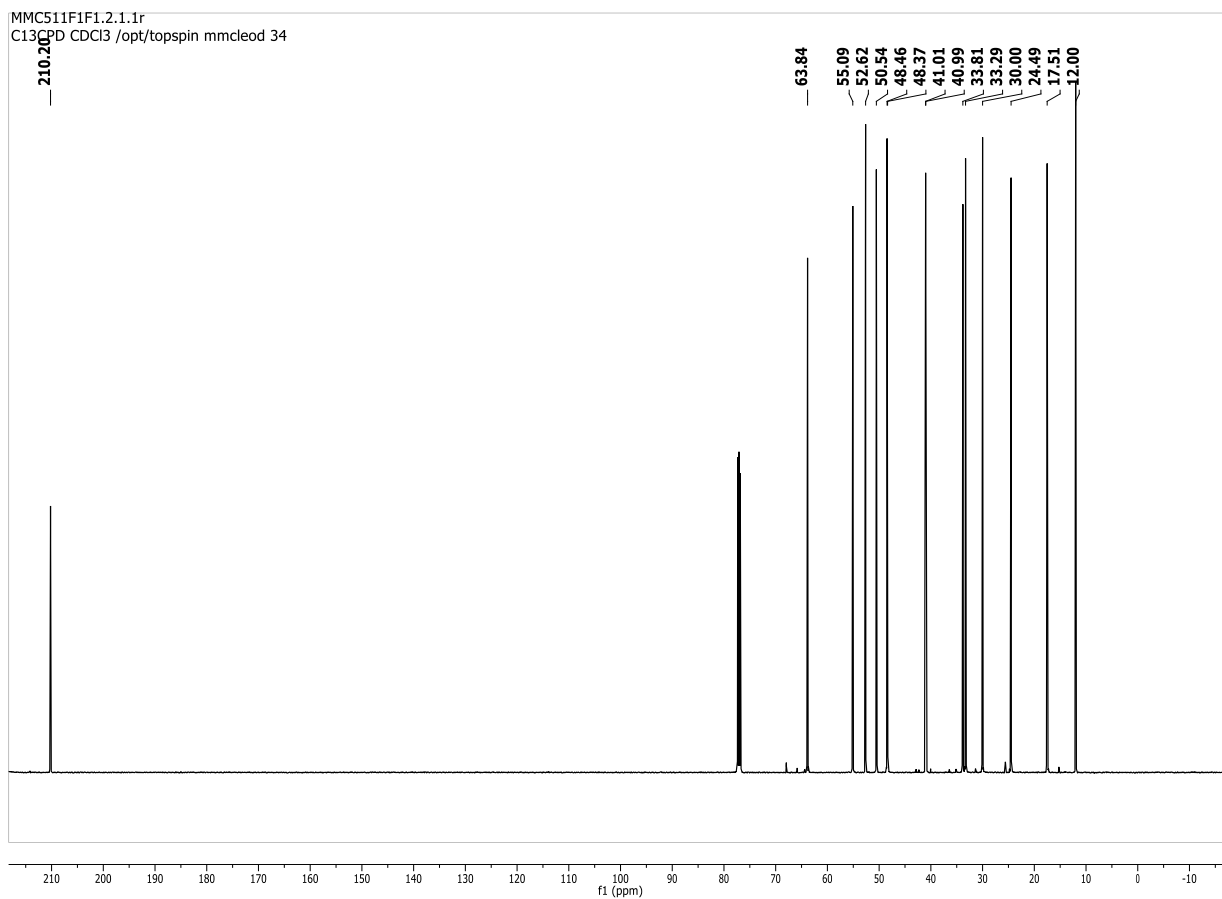

# Scaffold S1

MMC511F2.1.fid  
PROTON CDCl3 /opt/topspin mmcleod 24

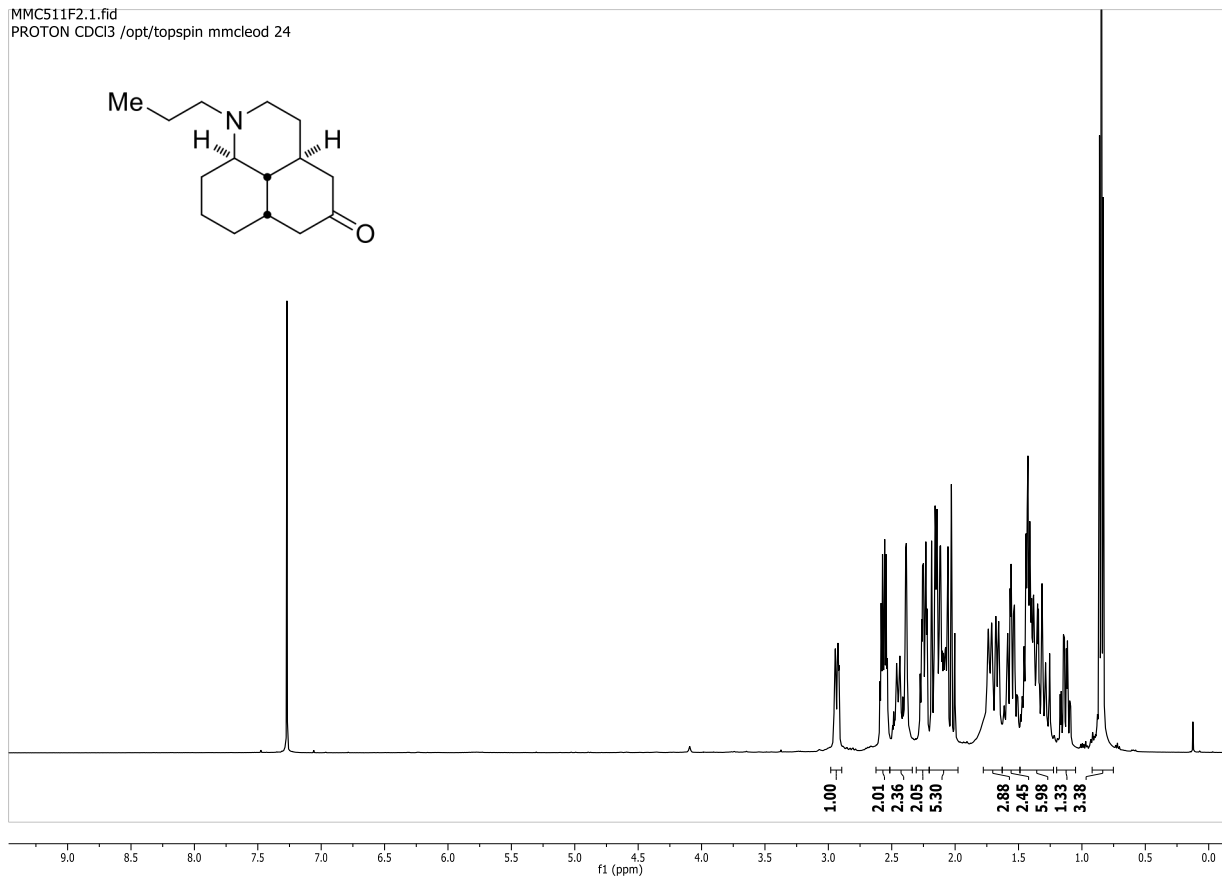

MMC511F2.2.1.1r  
C13CPD CDCl3 /opt/topspin mmcleod 24

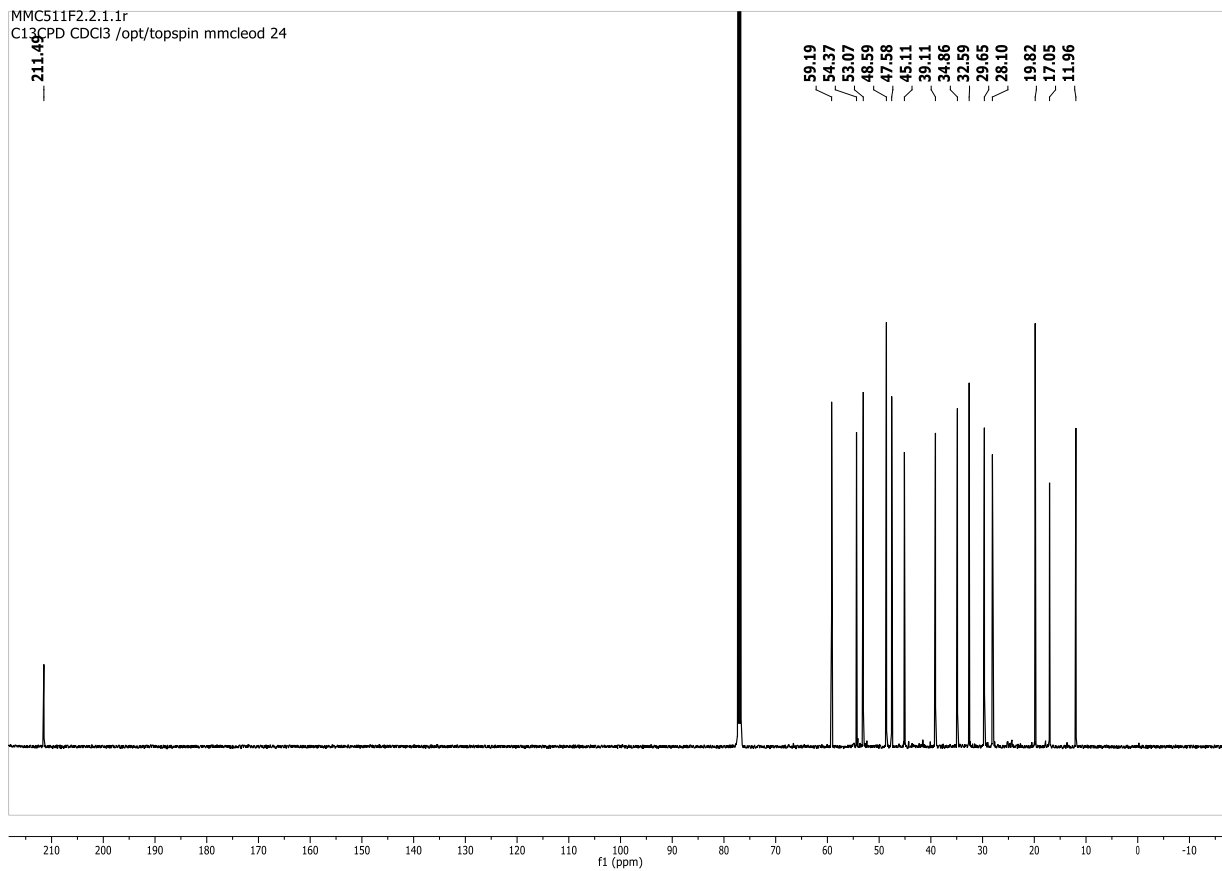

# Scaffold 6b

MMC421cr.1.fid  
PROTON CDCl3 /opt/topspin mmcleod 1

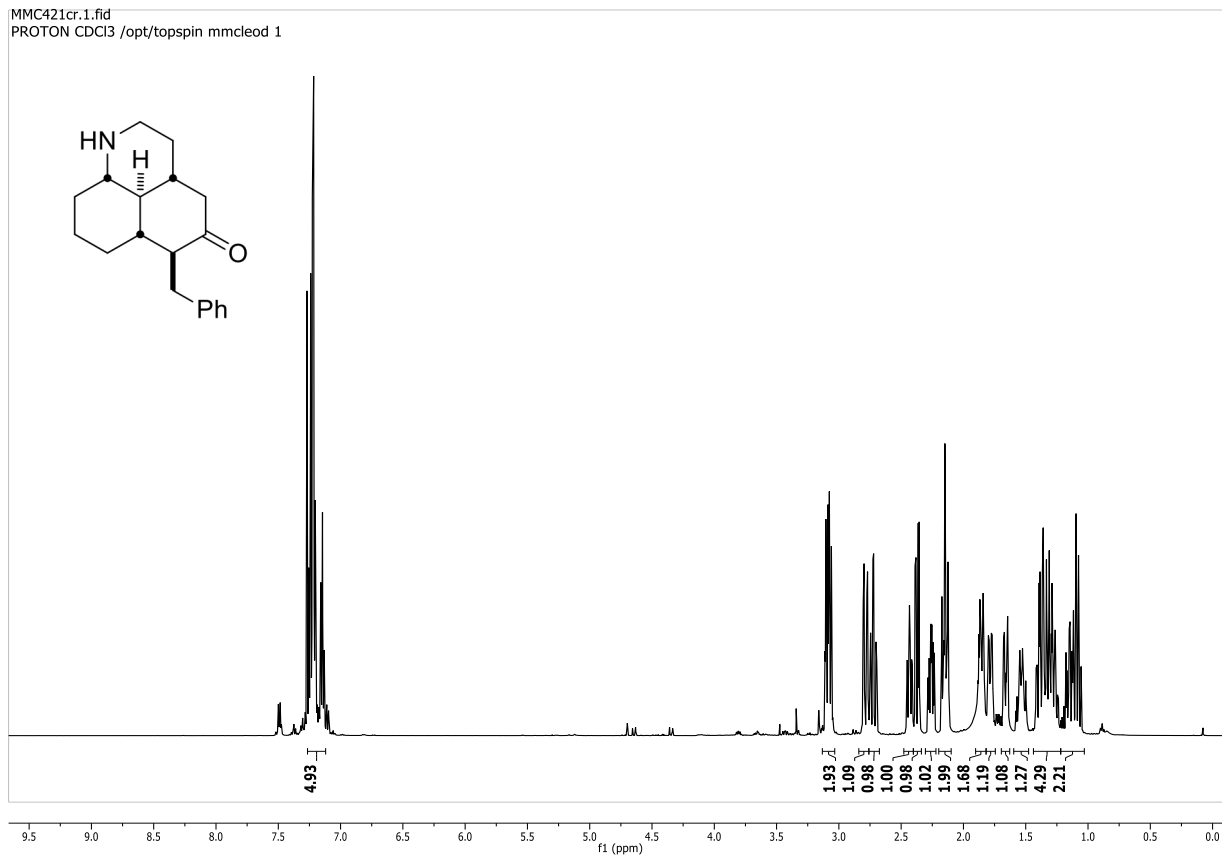

MMC421cr.2.1.1r  
C13CPD CDCl3 /opt/topspin mmcleod 1

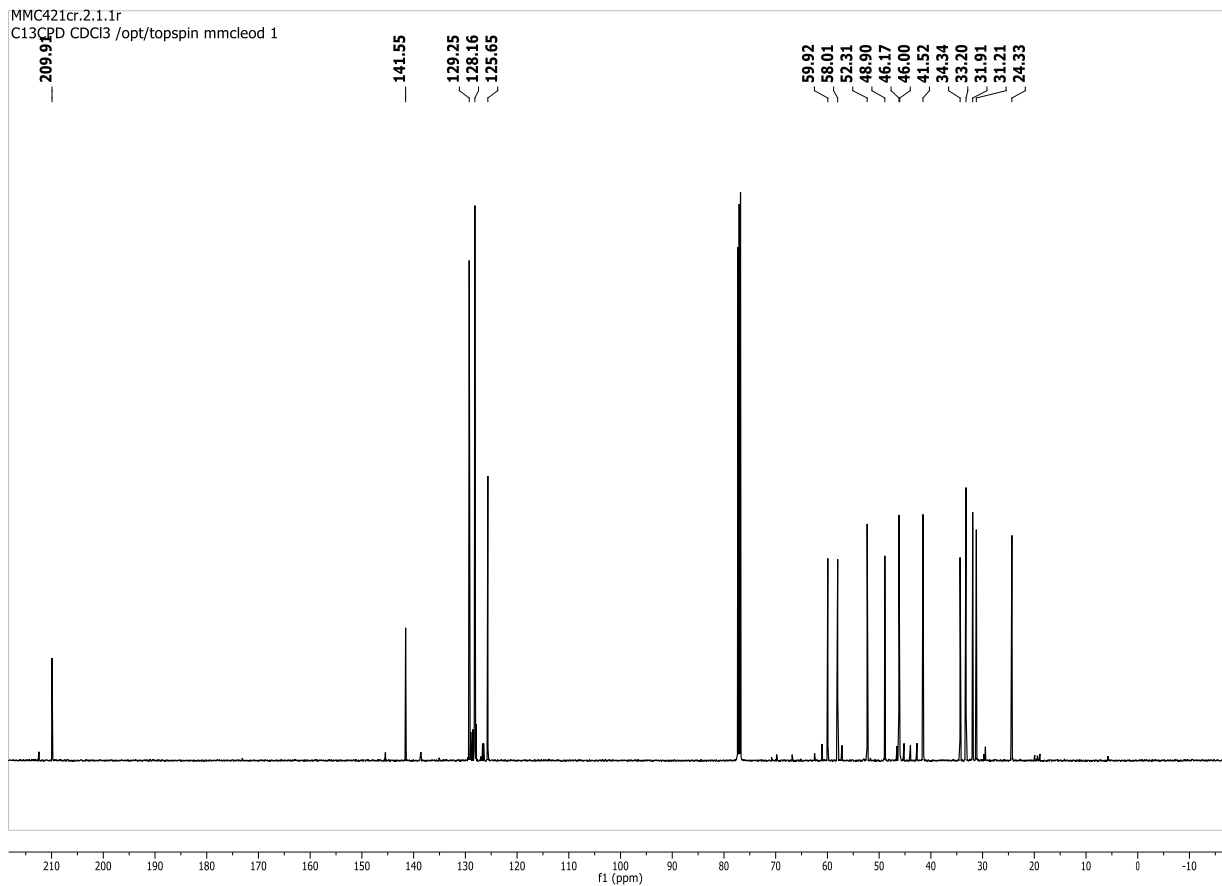

# Phosphonate 7d

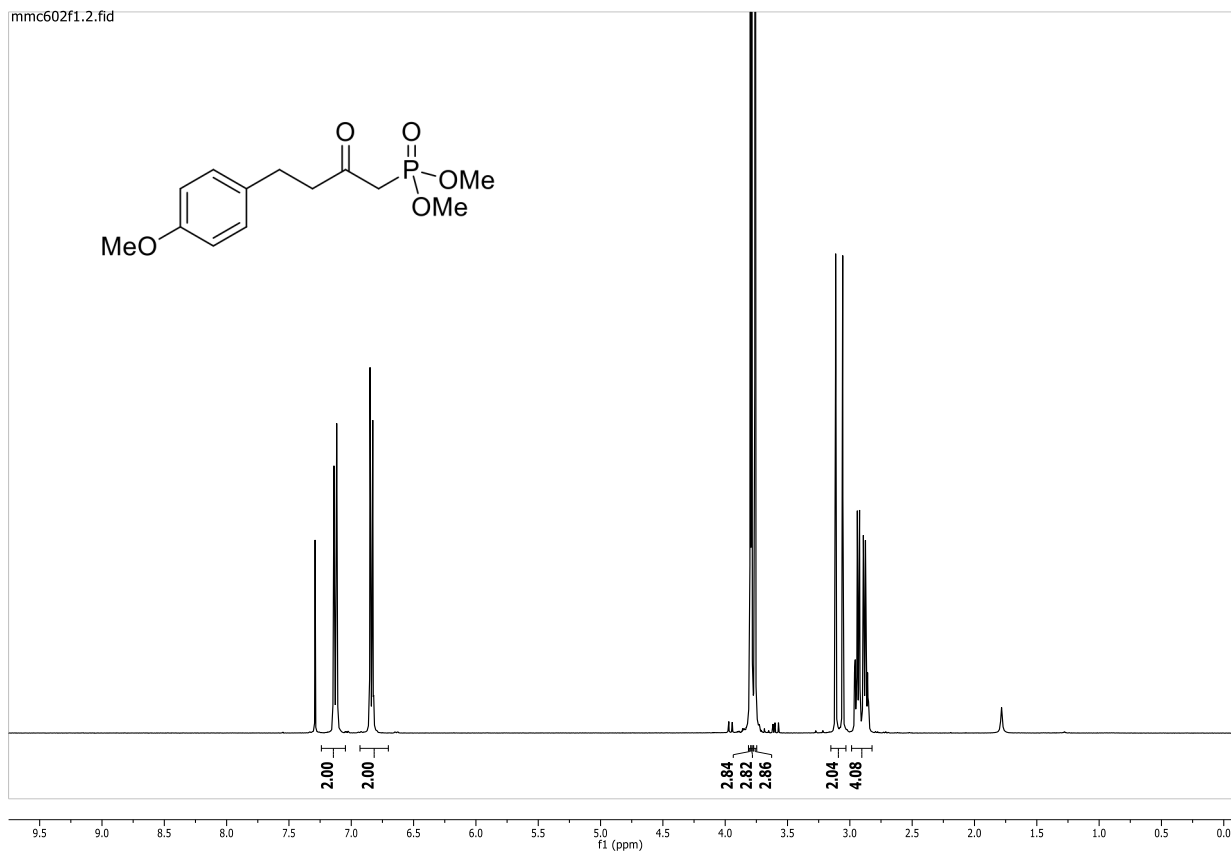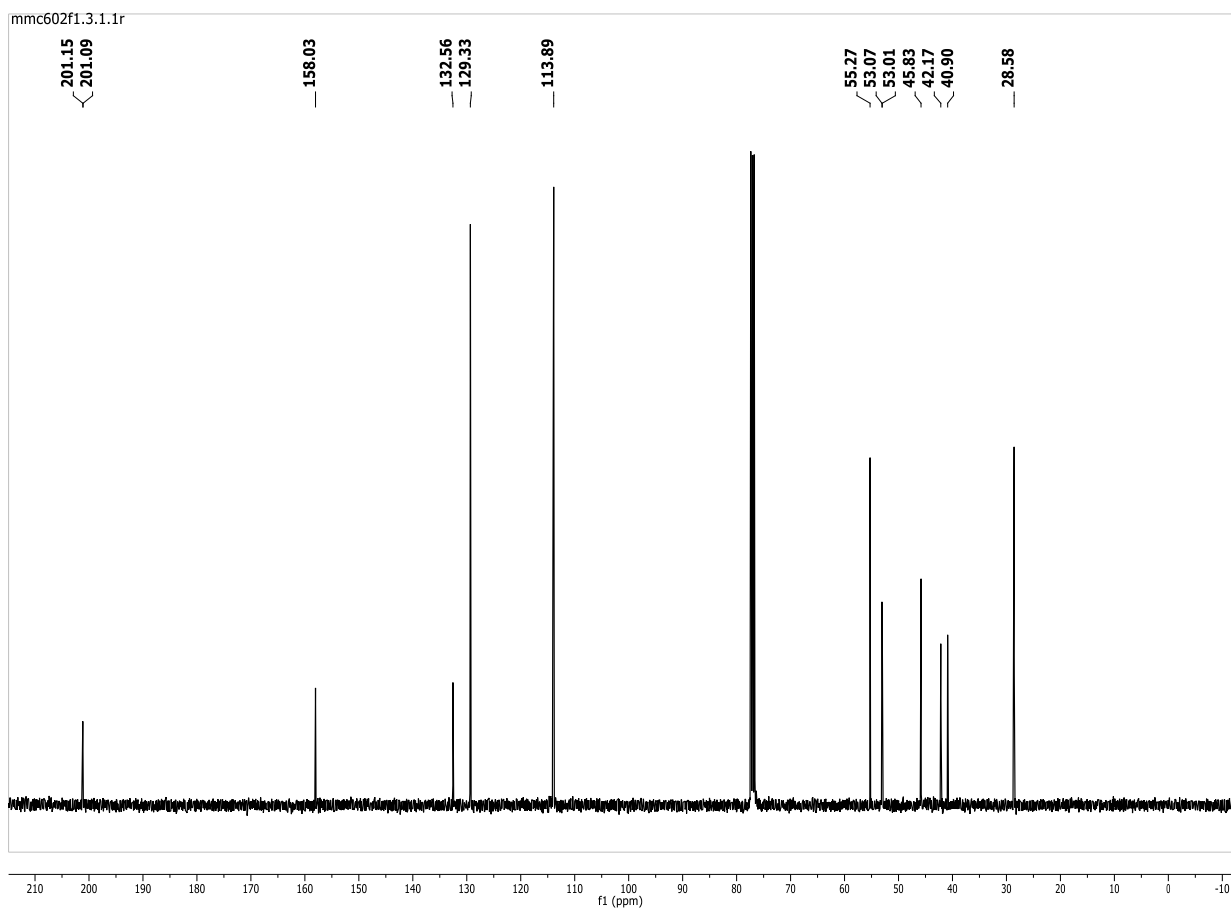

# Azide S3

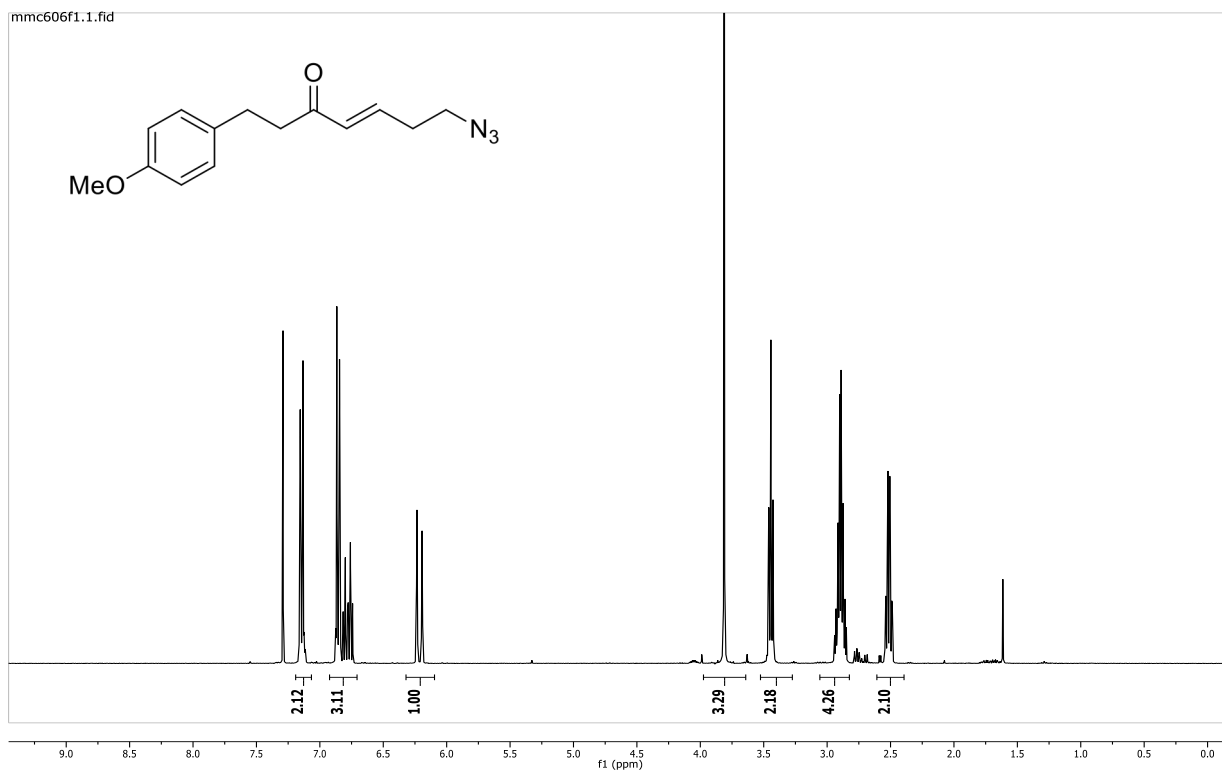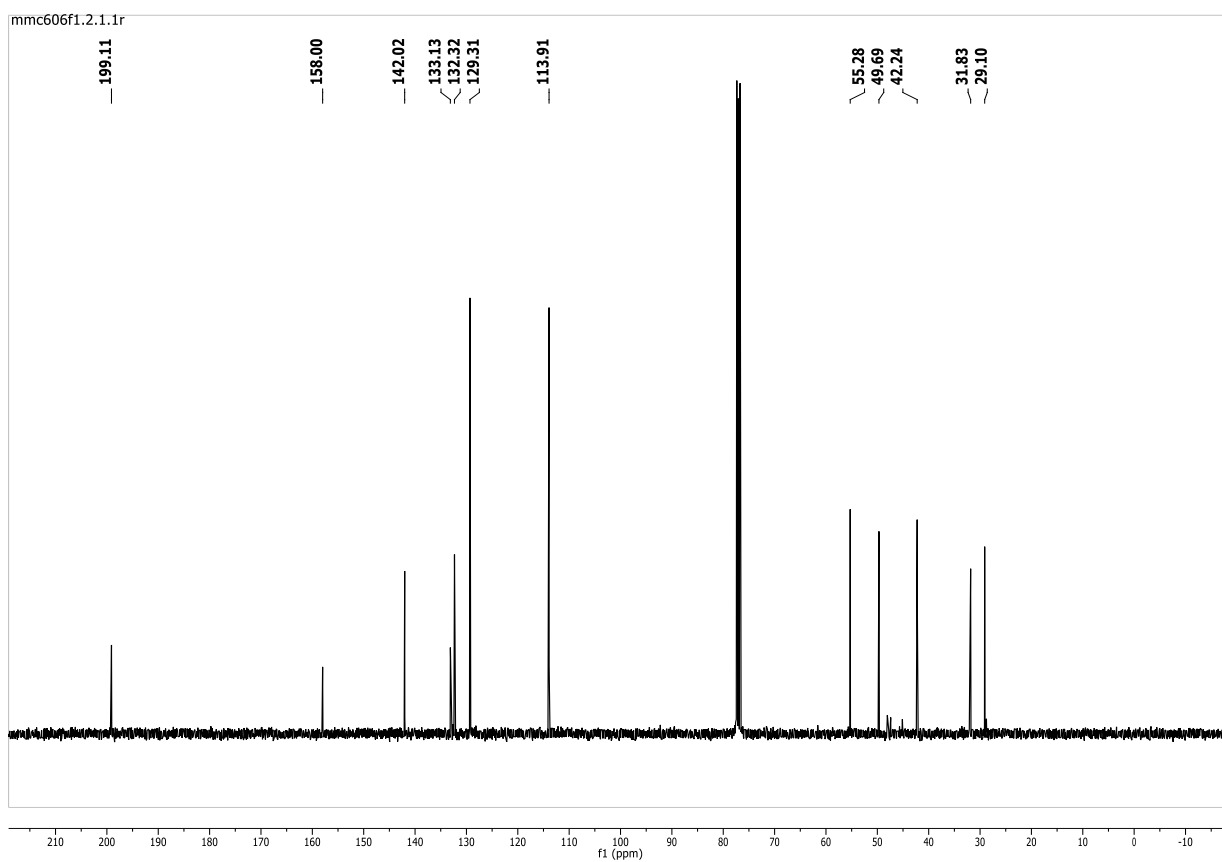

# Scaffold 6d

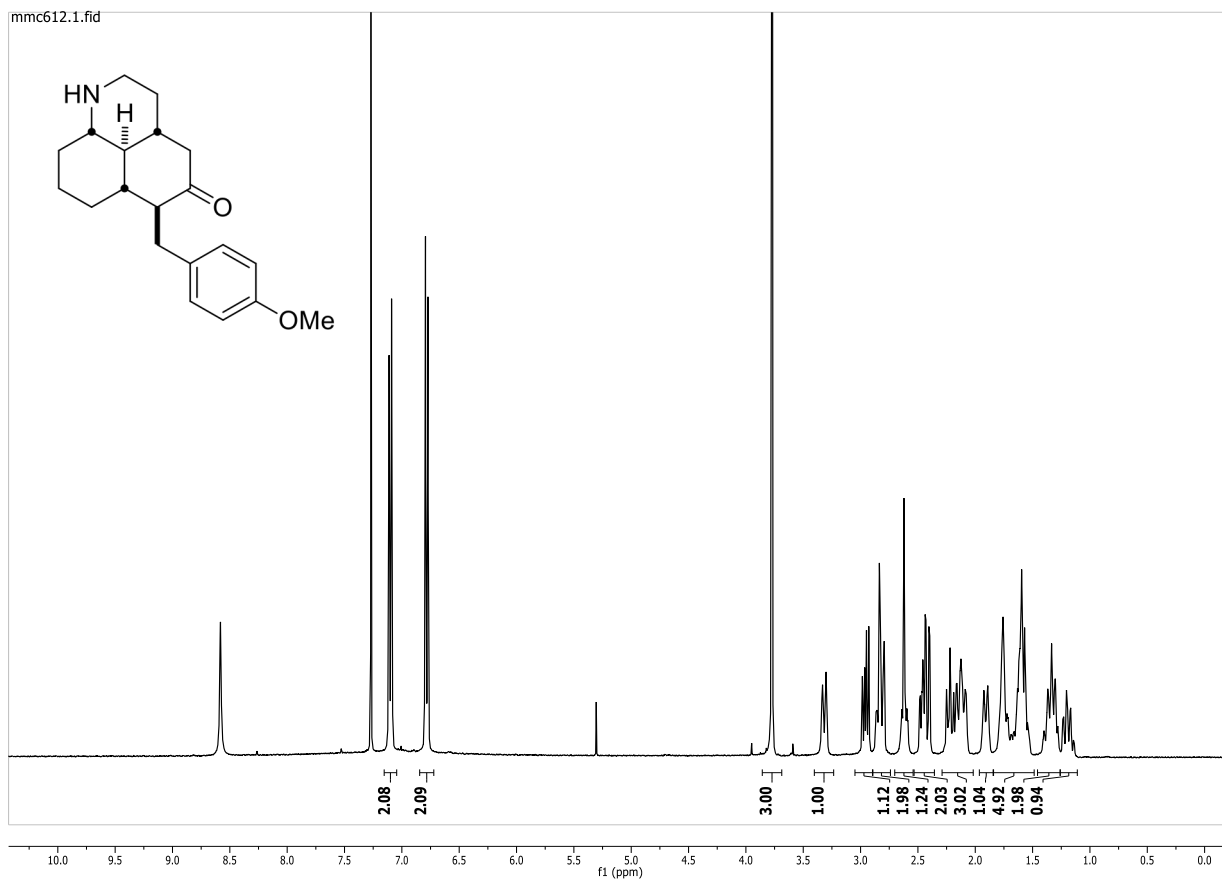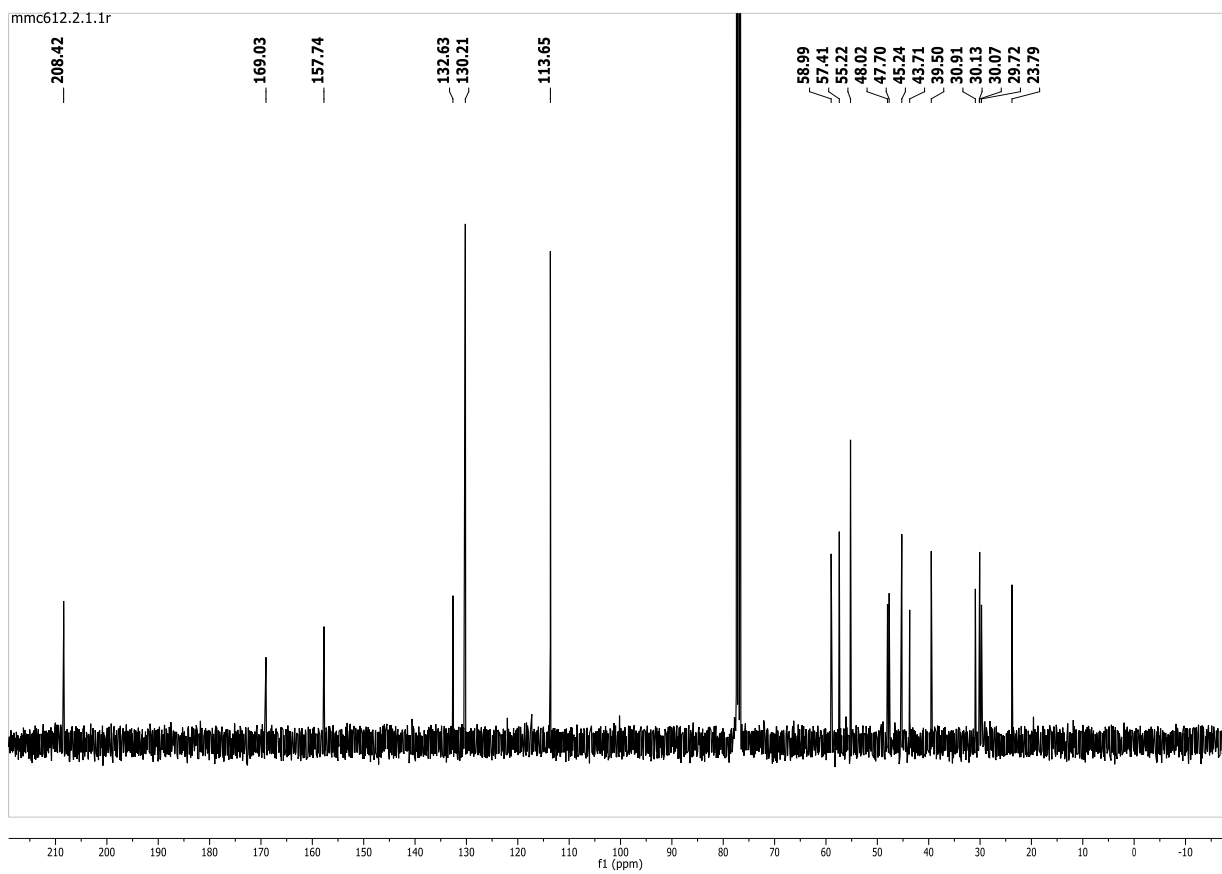

Amine **9b**{1}

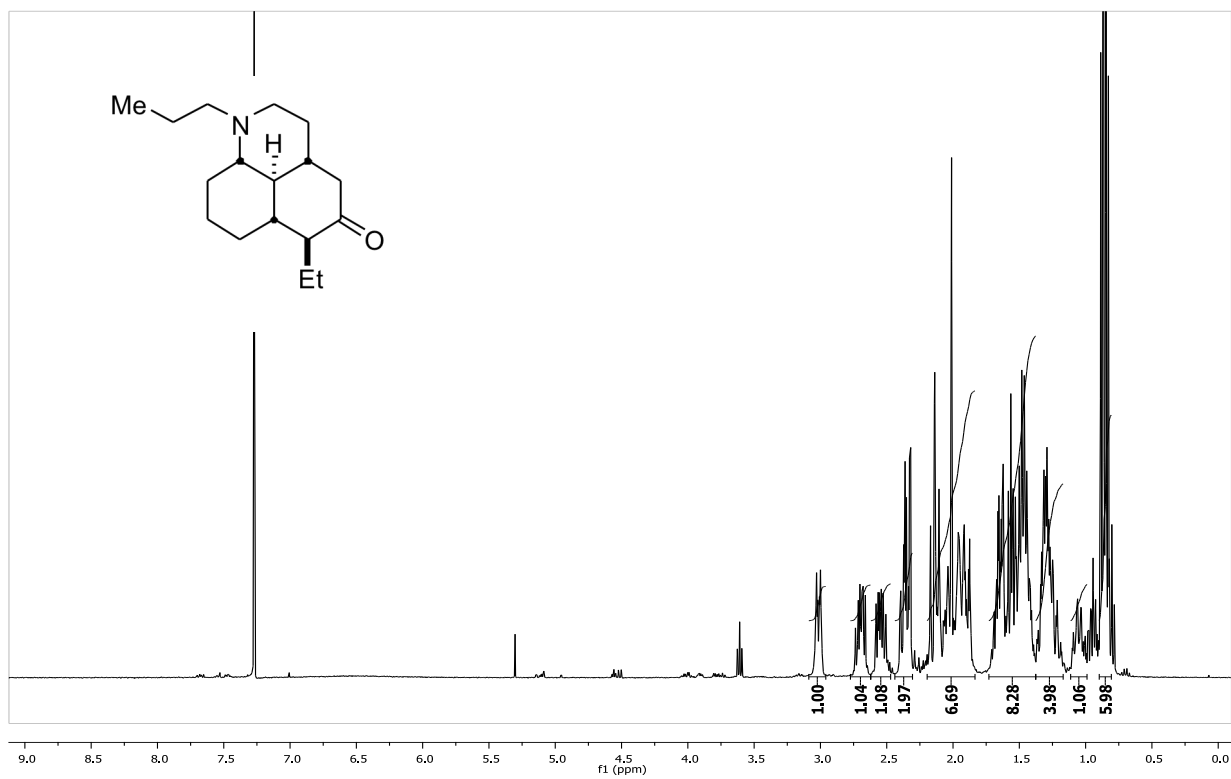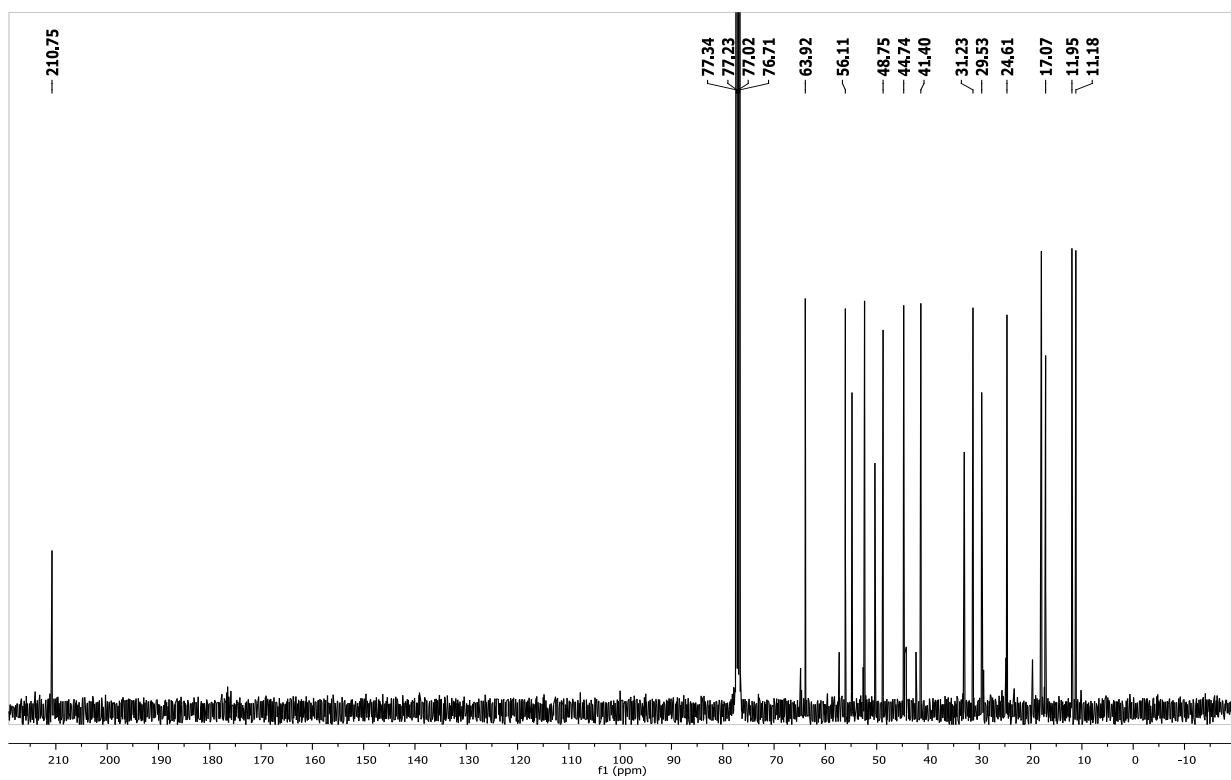

# Indolenine 15{1}

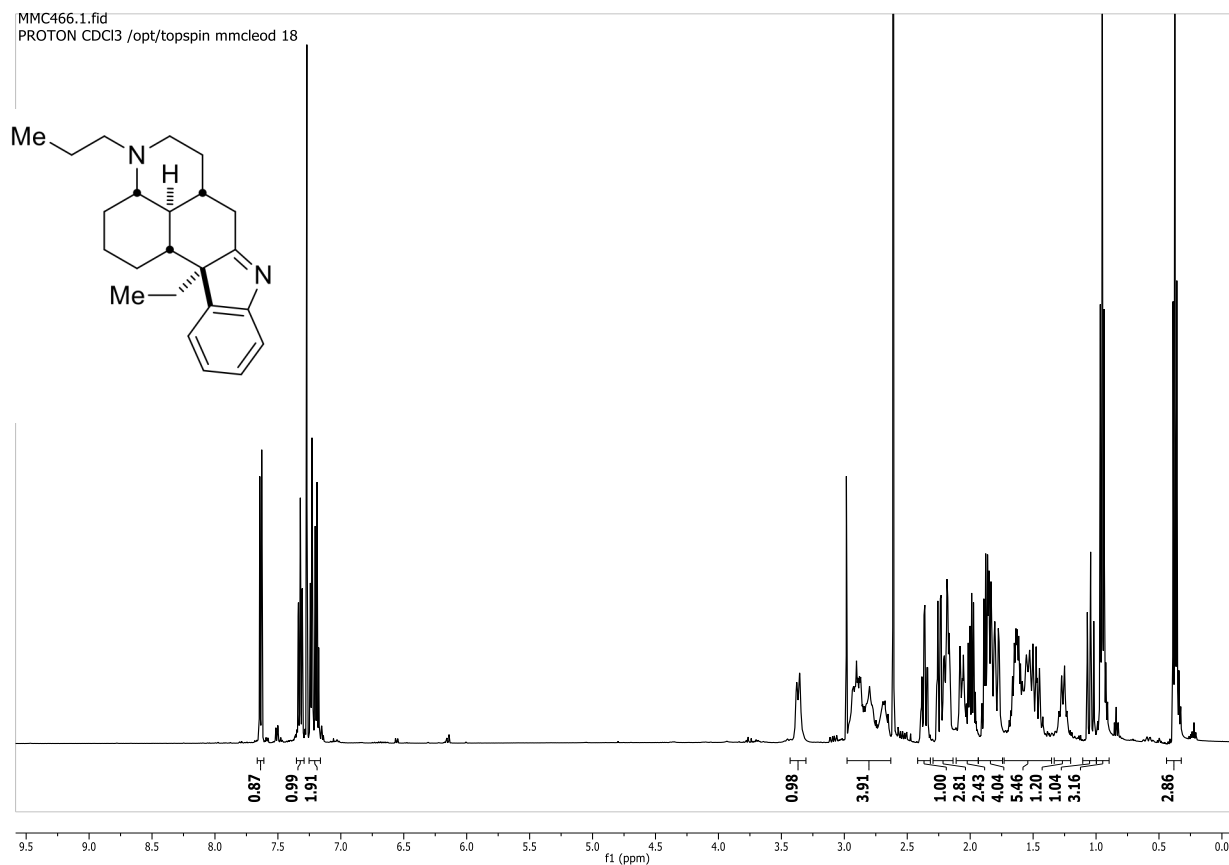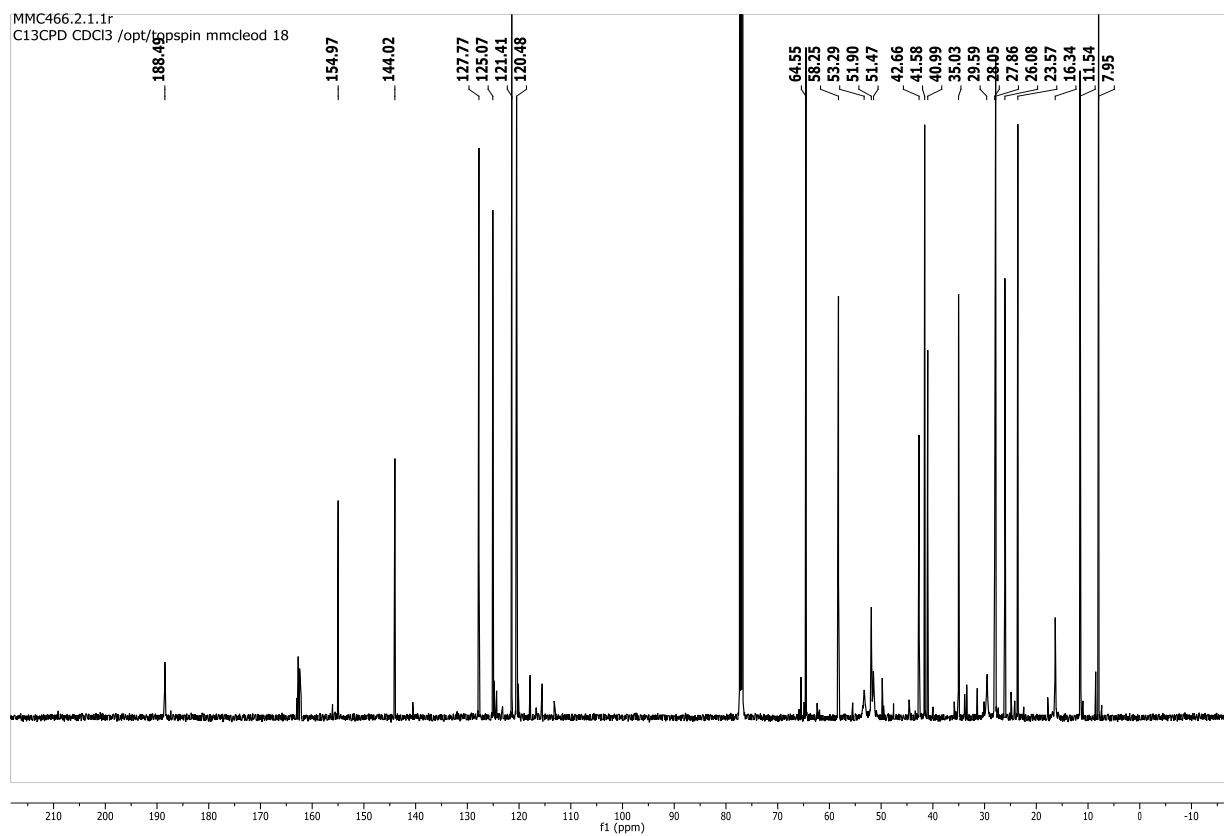



# Alcohol S4

MMC467F1.1.fid  
PROTON CDCl3 /opt/topspin mmcleod 11

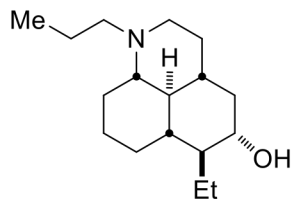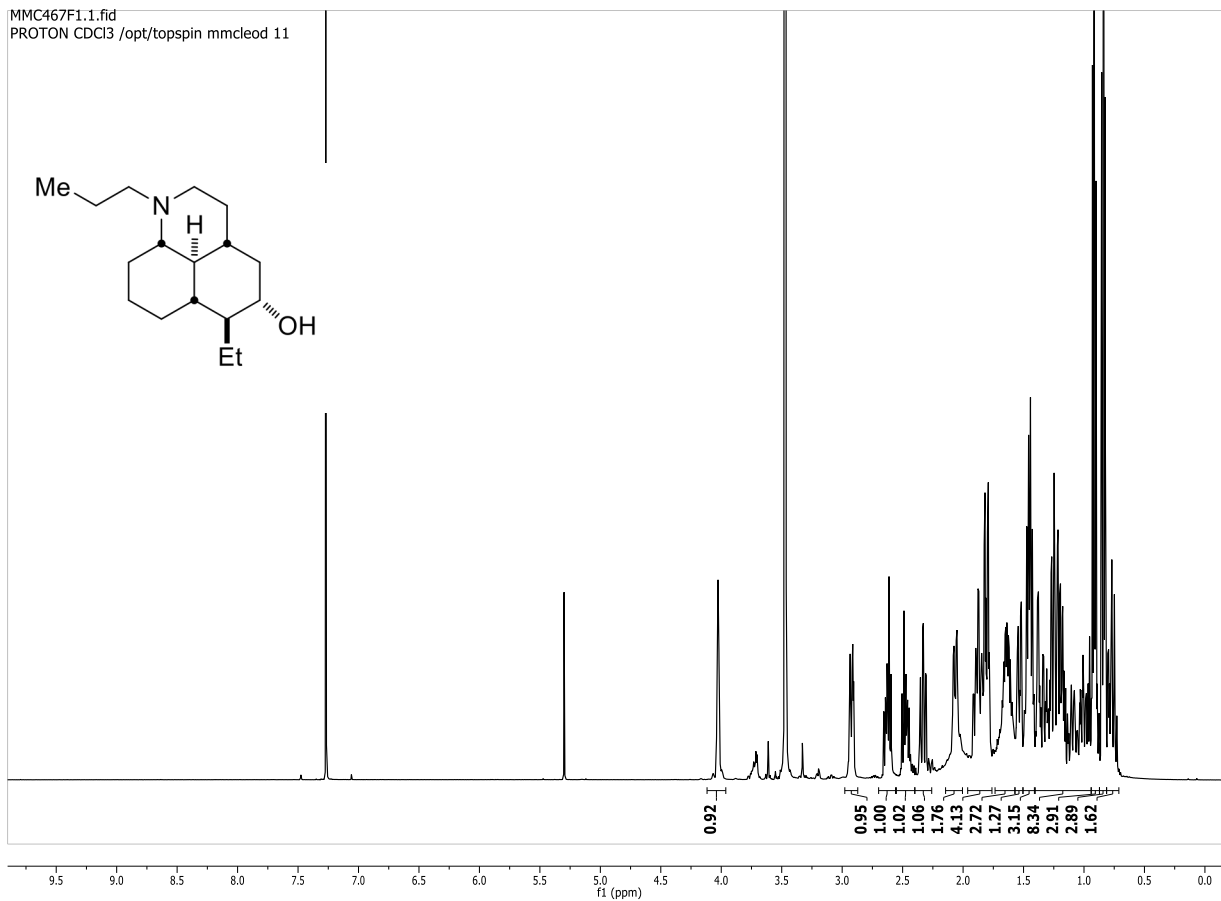

MMC467F1.2.1.1r  
C13CPD CDCl3 /opt/topspin mmcleod 11

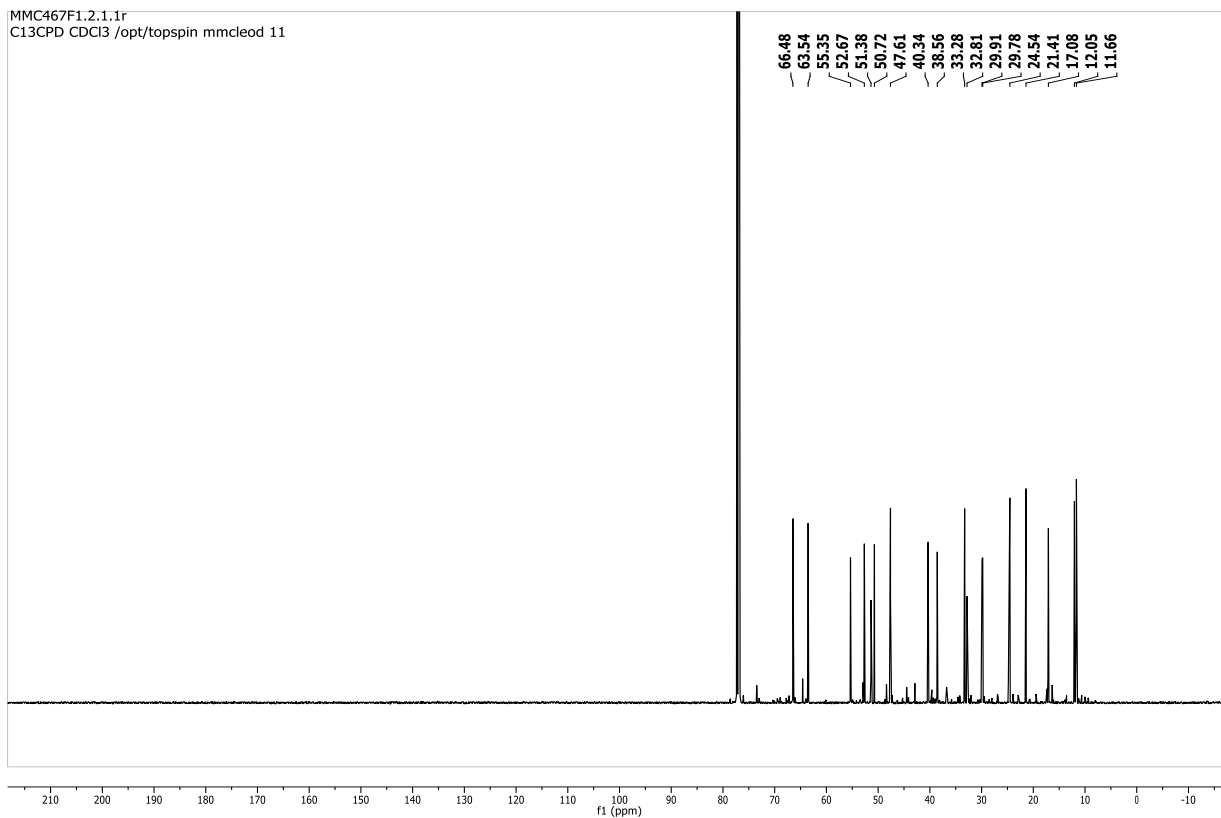

# Amine 9b{2}

MMC446A5.1.fid  
PROTON CDCl3 /opt/topspin mmcleod 4

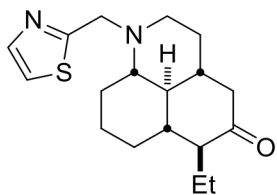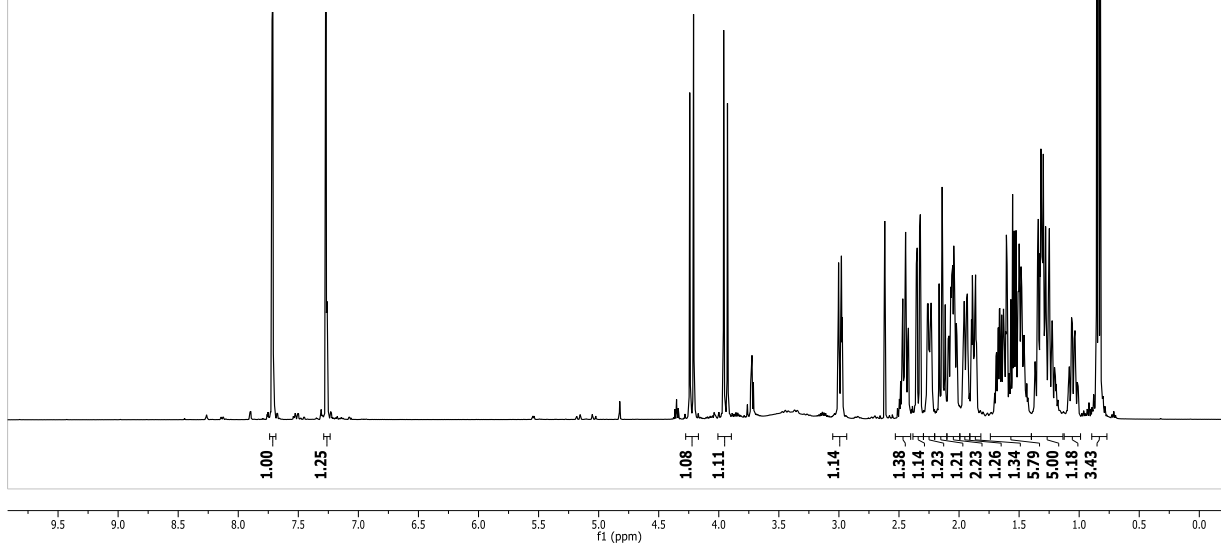

MMC446A5.2.1.1r  
C13CPD CDCl3 /opt/topspin mmcleod 4

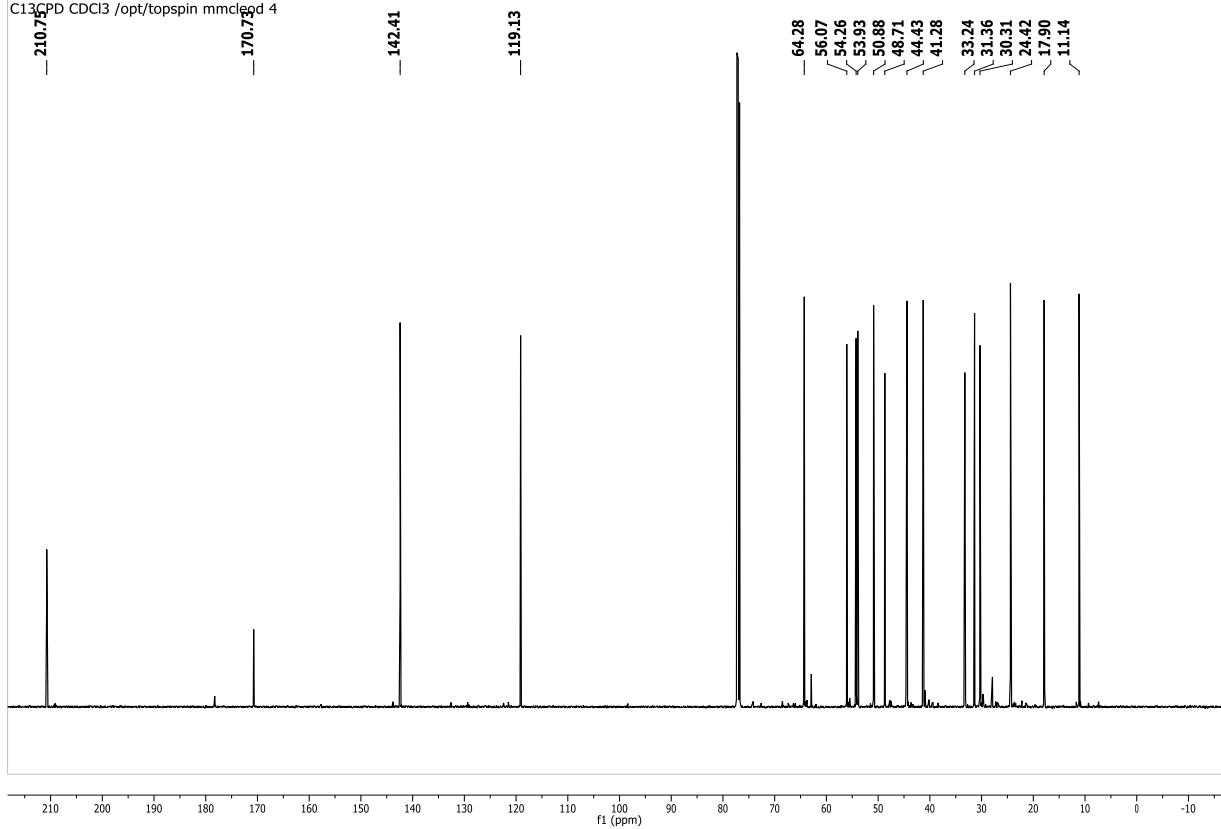

# Amine 9c{1}

MMC491A.1.fid  
PROTON CDCl3 /opt/topspin mmcleod 60

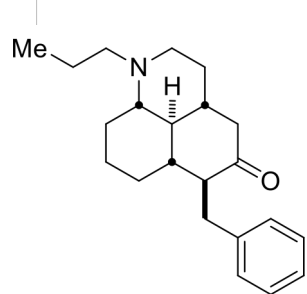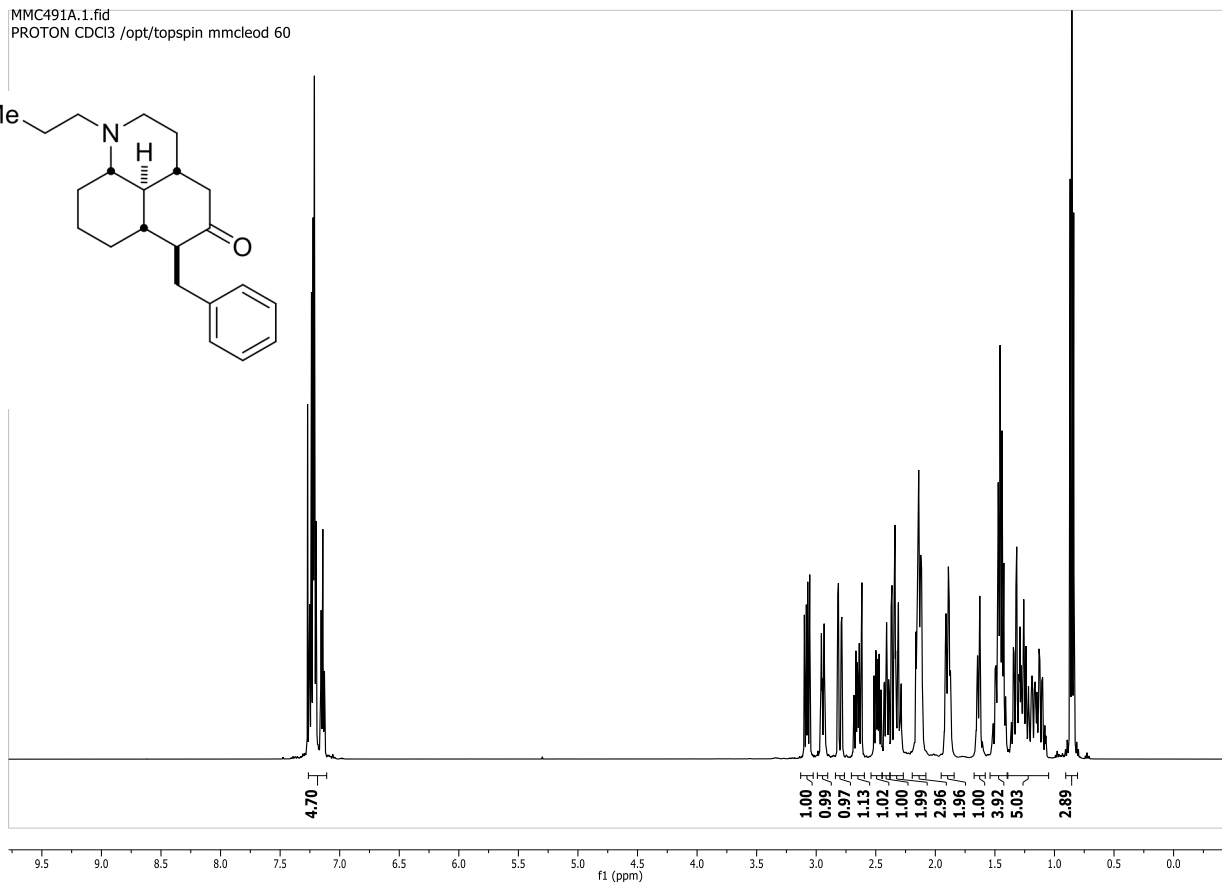

MMC491A.2.1.1r  
C13CPD CDCl3 /opt/topspin mmcleod 60

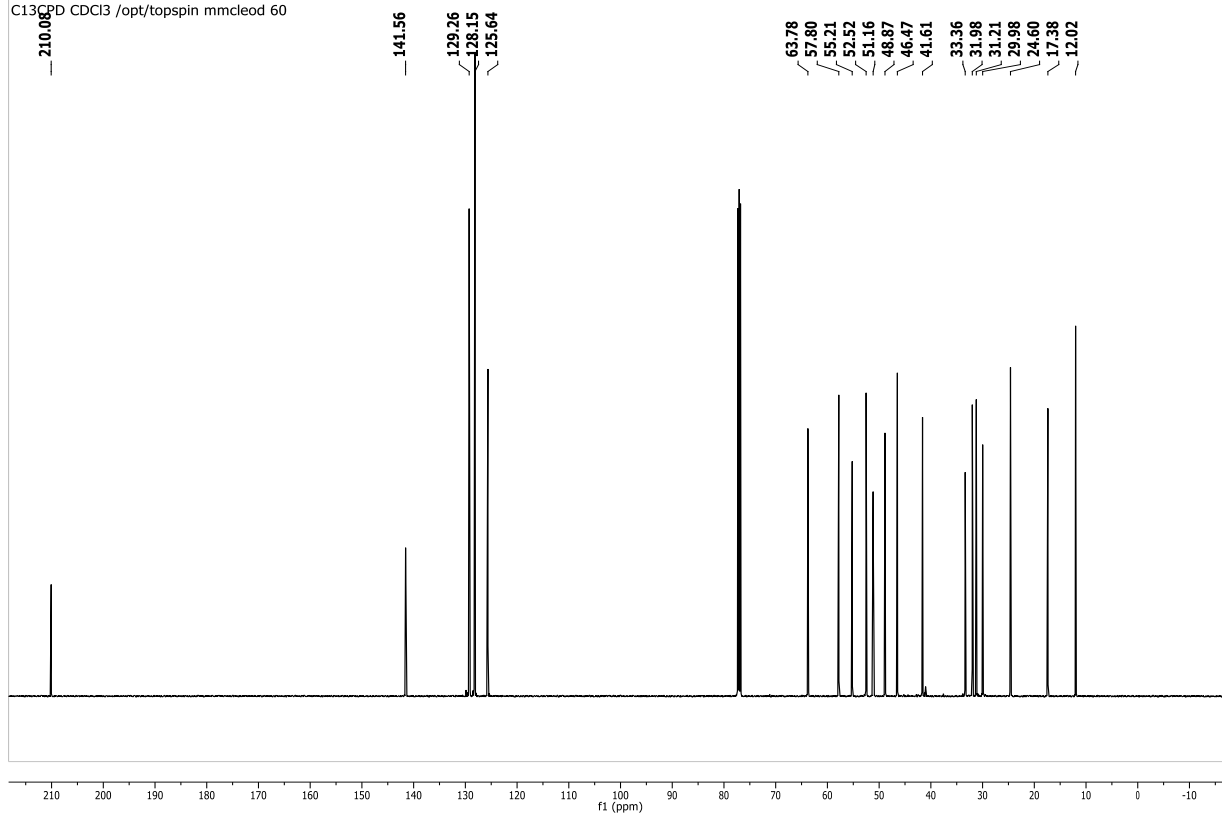

Amine 9c{2}

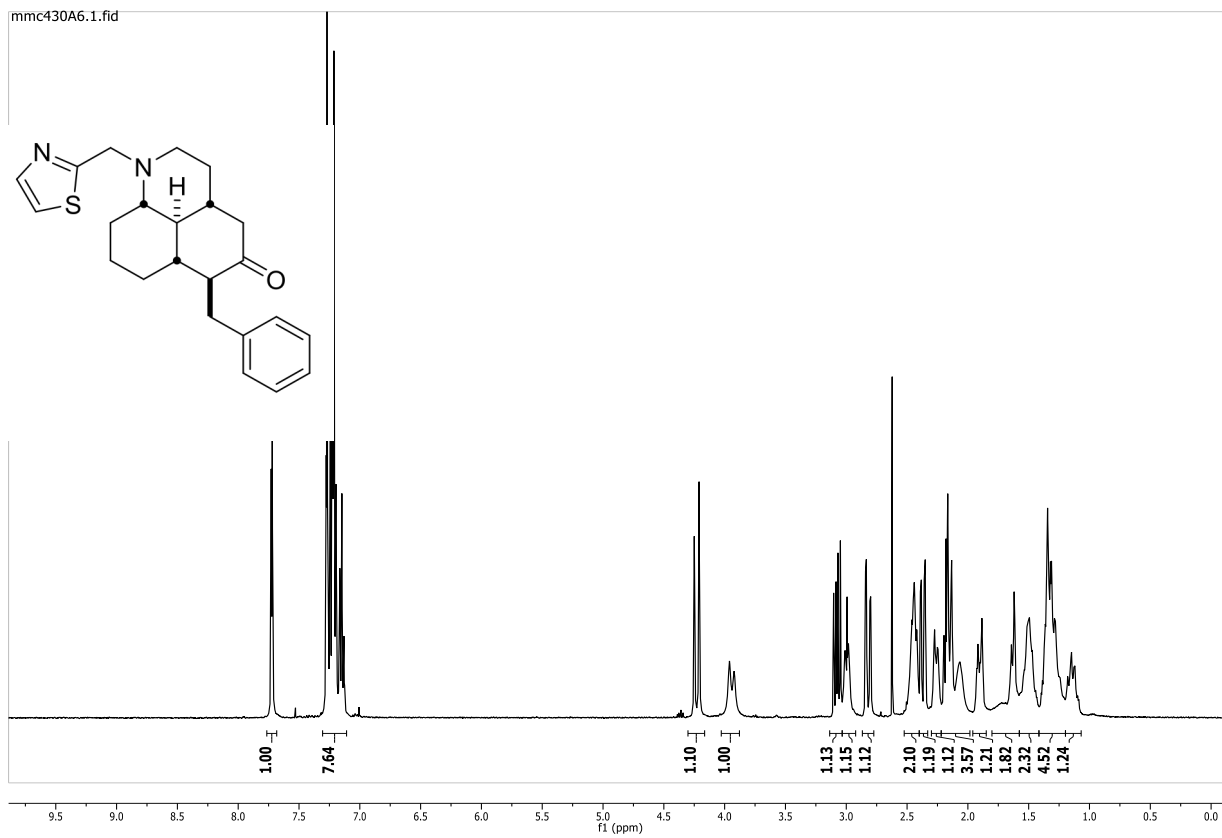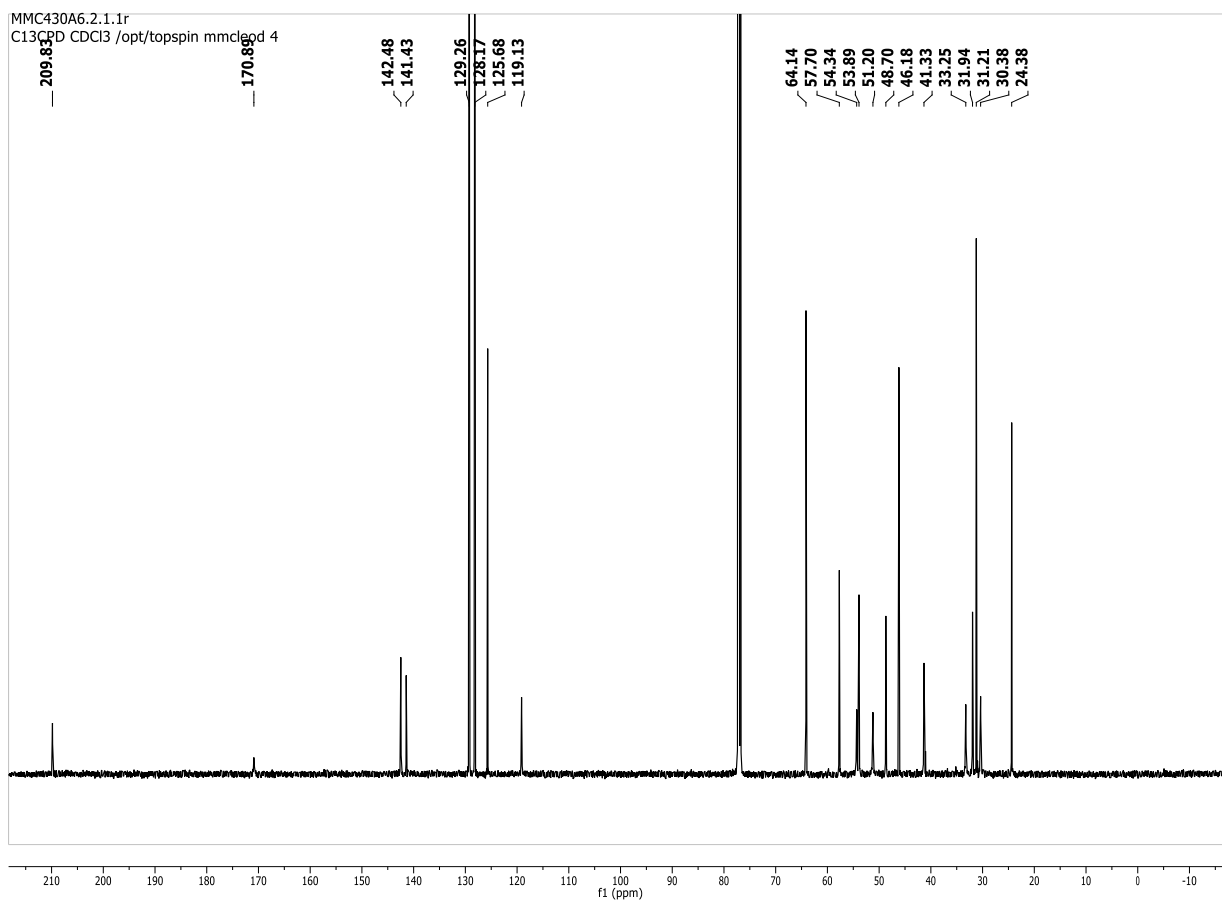

# Quinoline 17{6}

MMC489E.1.fid  
PROTON CDCl3 /opt/topspin mmcleod 59

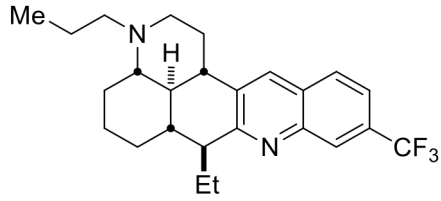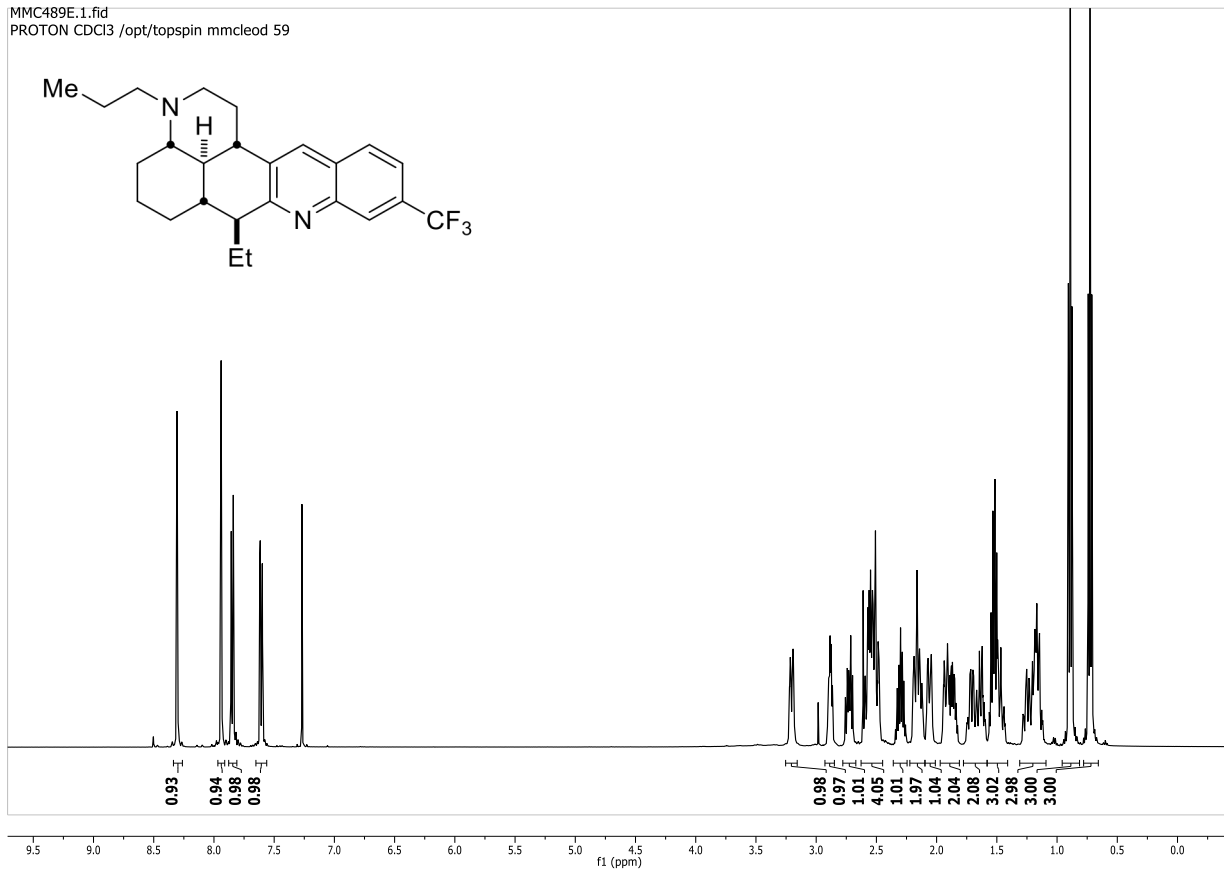

MMC489E.2.1.f  
C13CPD CDCl3 /opt/topspin mmcleod 59

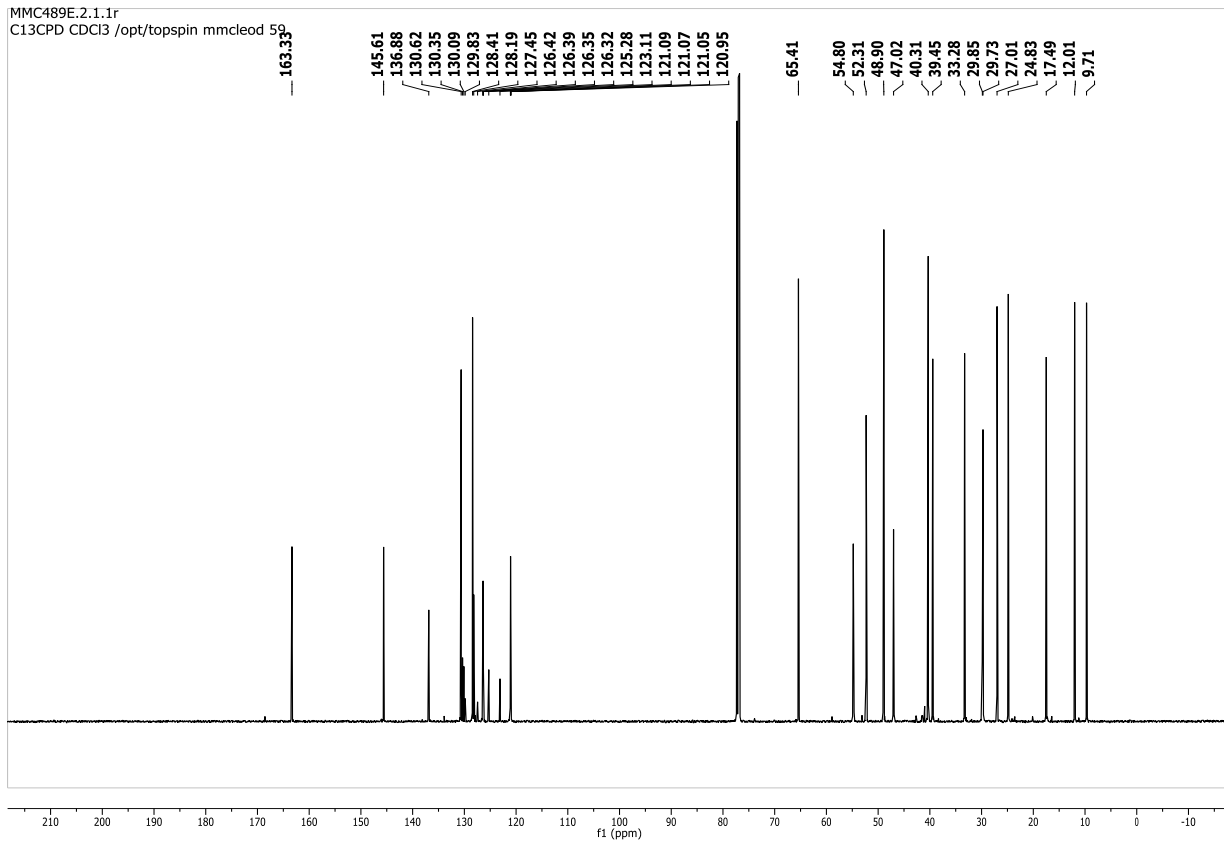

# Quinoline 17{5}

MMC489D.1.fid  
PROTON CDCl3 /opt/topspin mmcleod 58

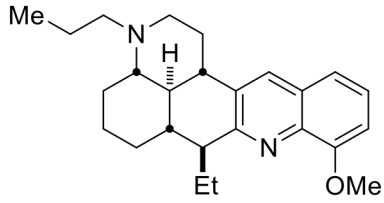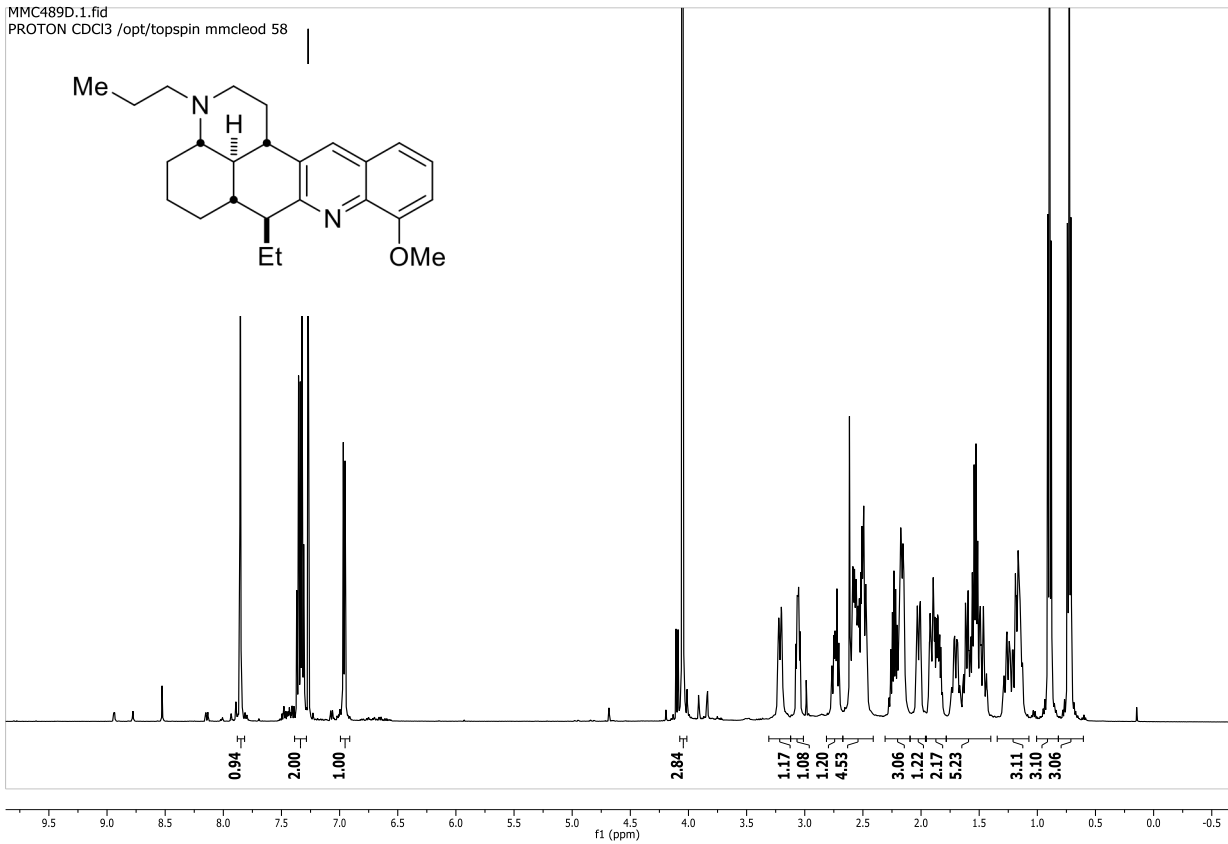

MMC489D.2.1.1r  
C13CPD CDCl3 /opt/topspin mmcleod 58

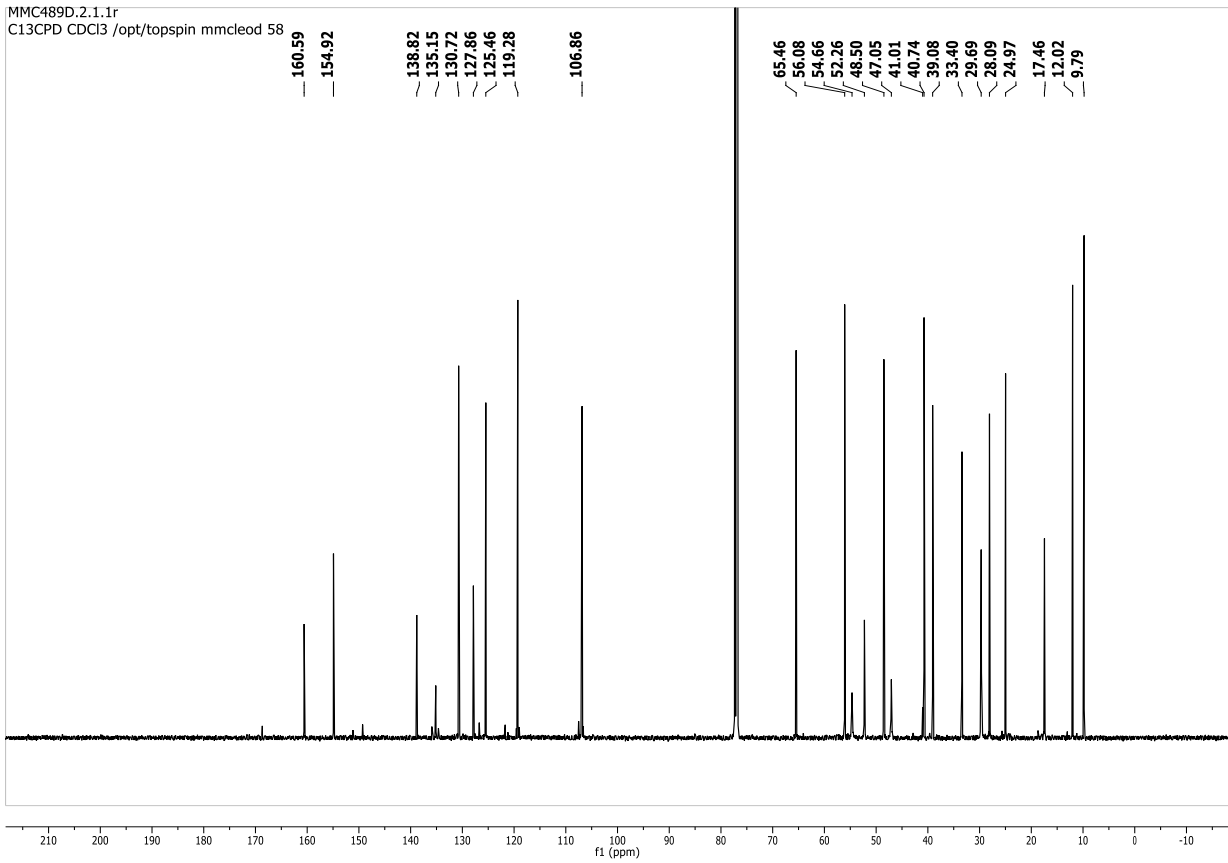

# Quinoline 17{4}

MMC489C.1.fid  
PROTON CDCl3 /opt/topspin mmcleod 57

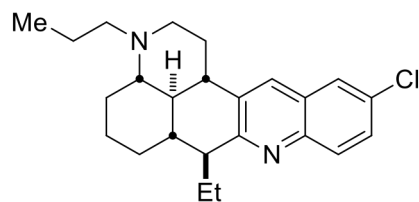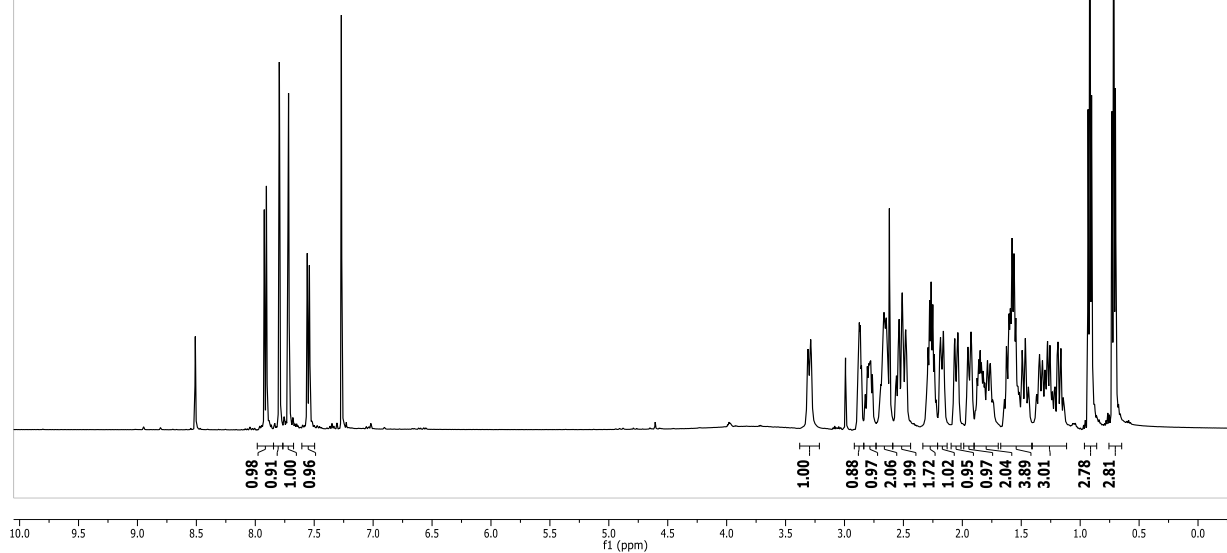

MMC489C.2.1.1r  
C13CPD CDCl3 /opt/topspin mmcleod 57

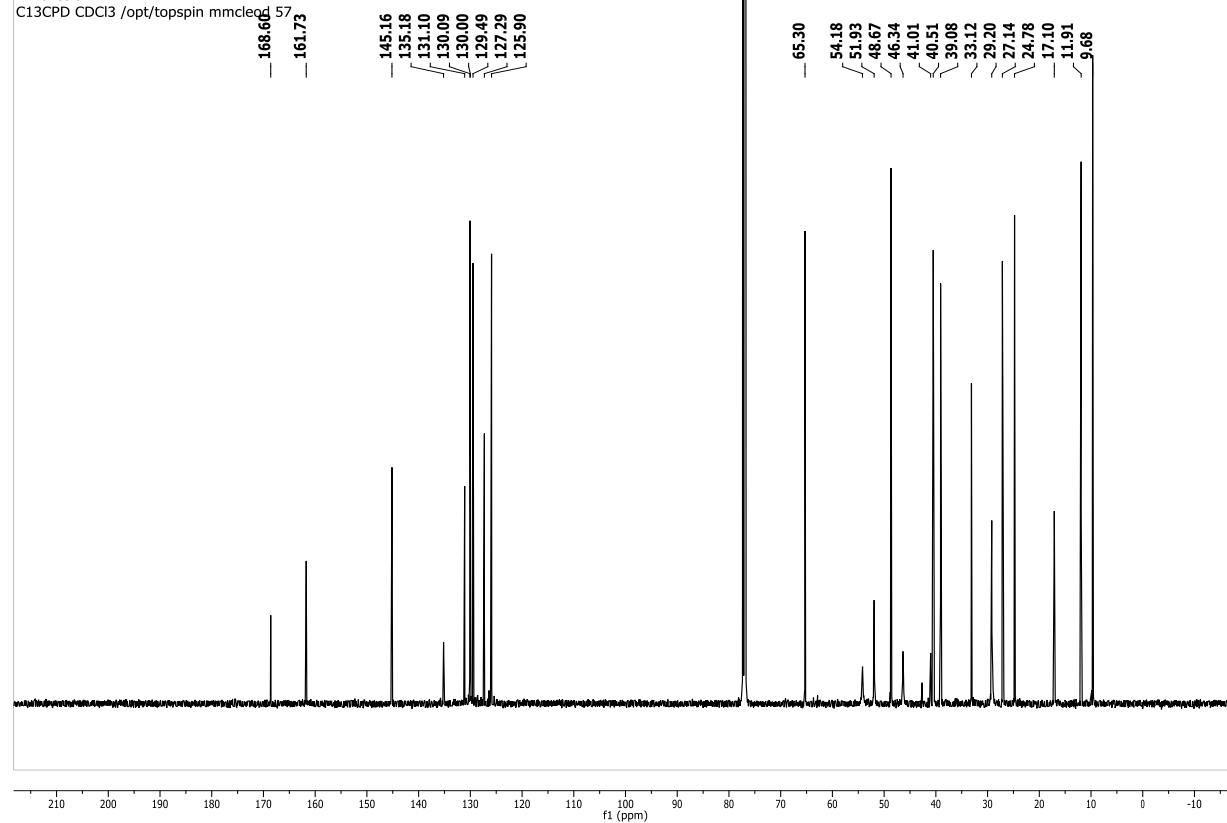

Amine 9d{1}

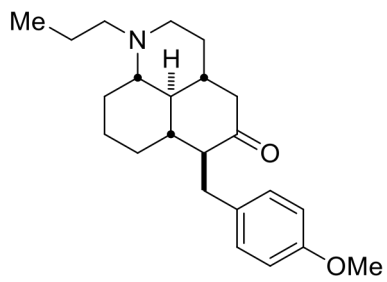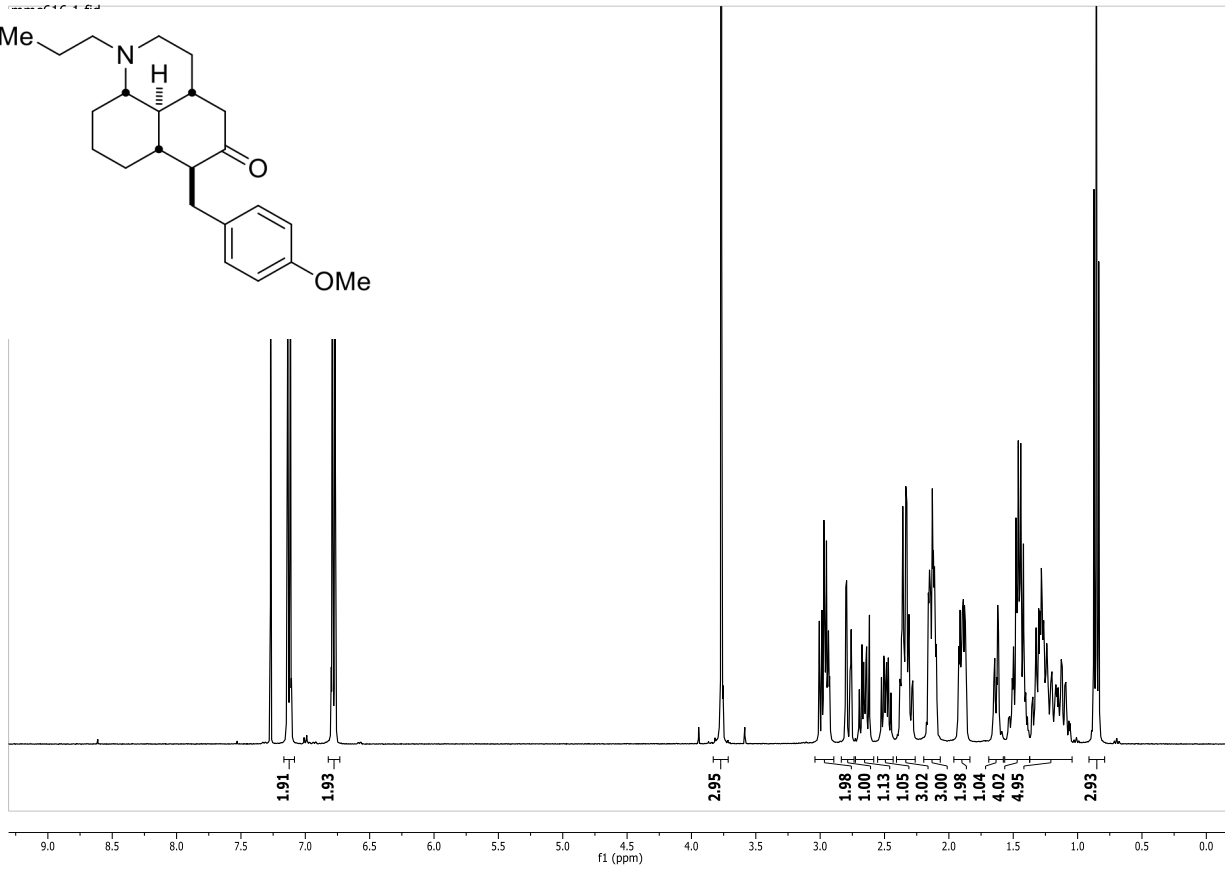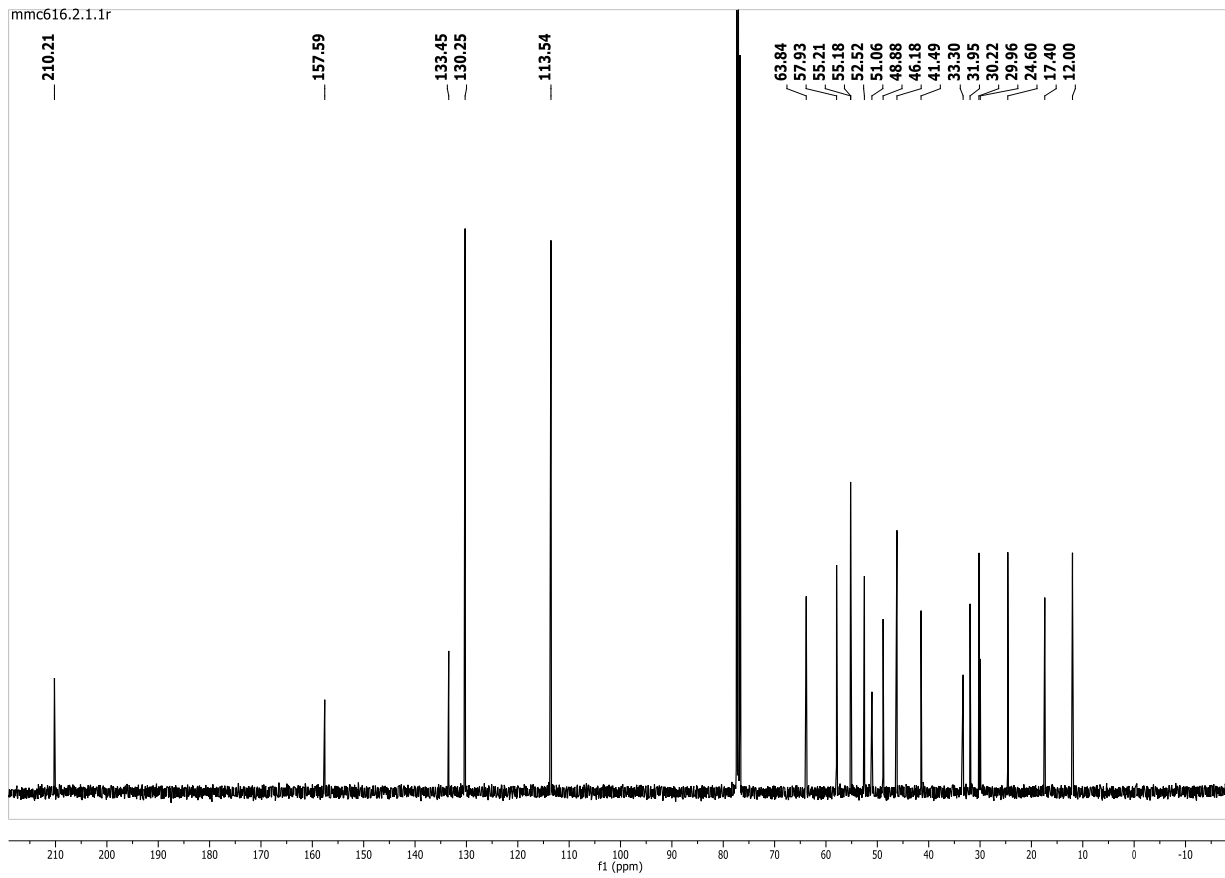



# Amine 9d{4}

MMC682B5.1.fid  
PROTON CDCl3 /opt/topspin mmcleod 21

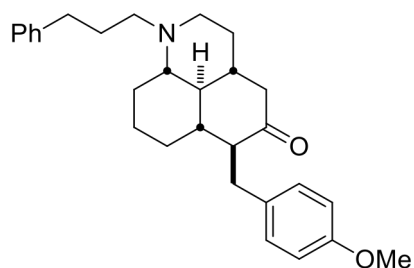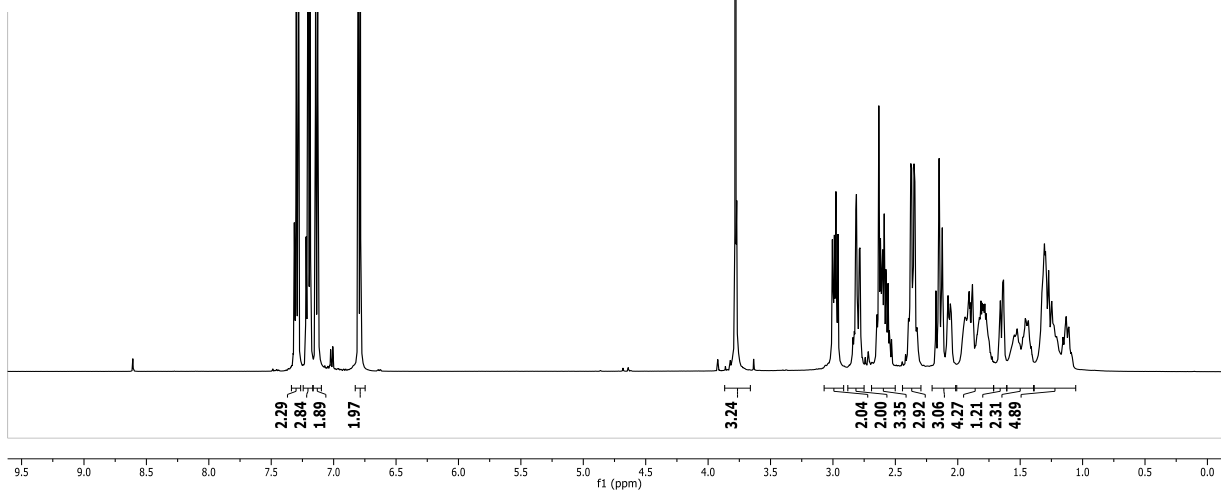

MMC682B5.2.1.1f  
C13 CPD CDCl3 /opt/topspin mmcleod 21

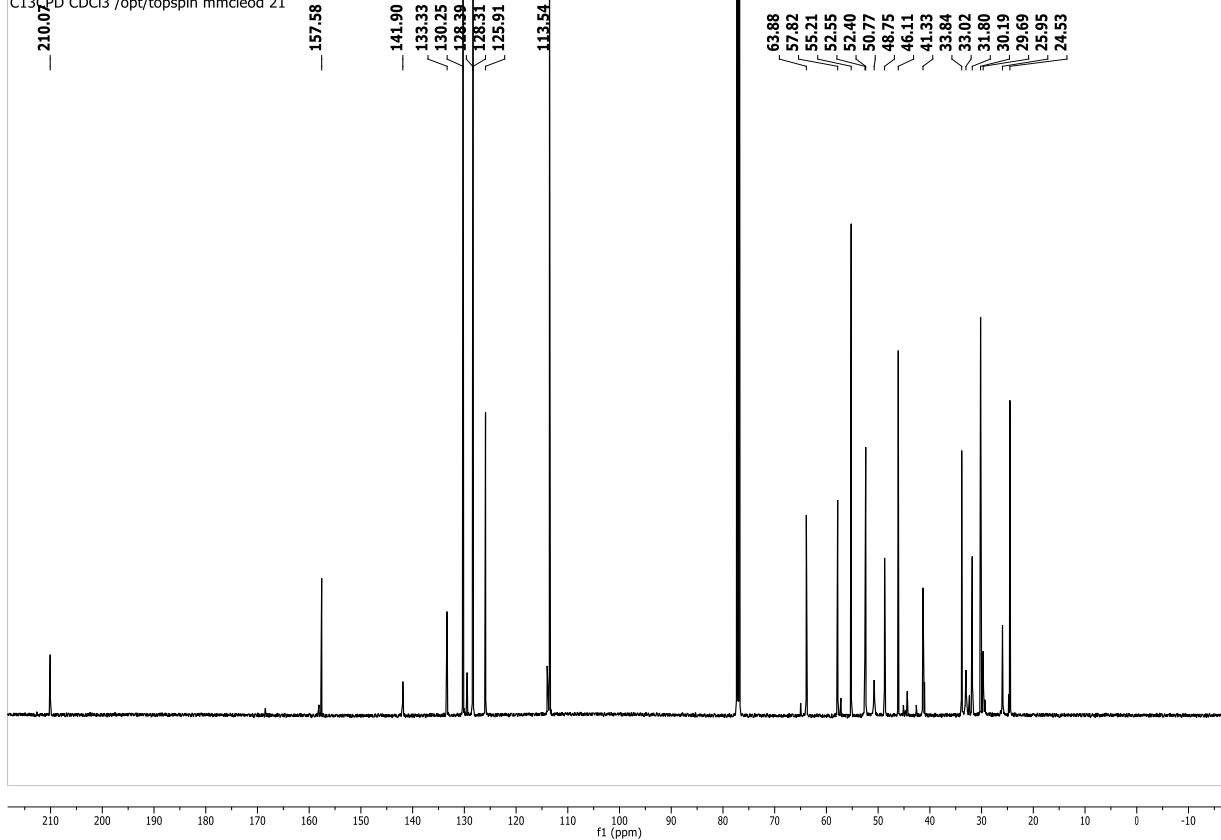

# Amine 9d{6}

MMC682B3.1.fid  
 PROTON CDCl3 /opt/topspin mmcleod 20

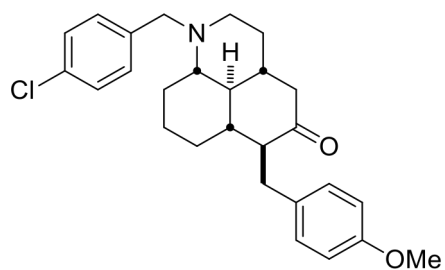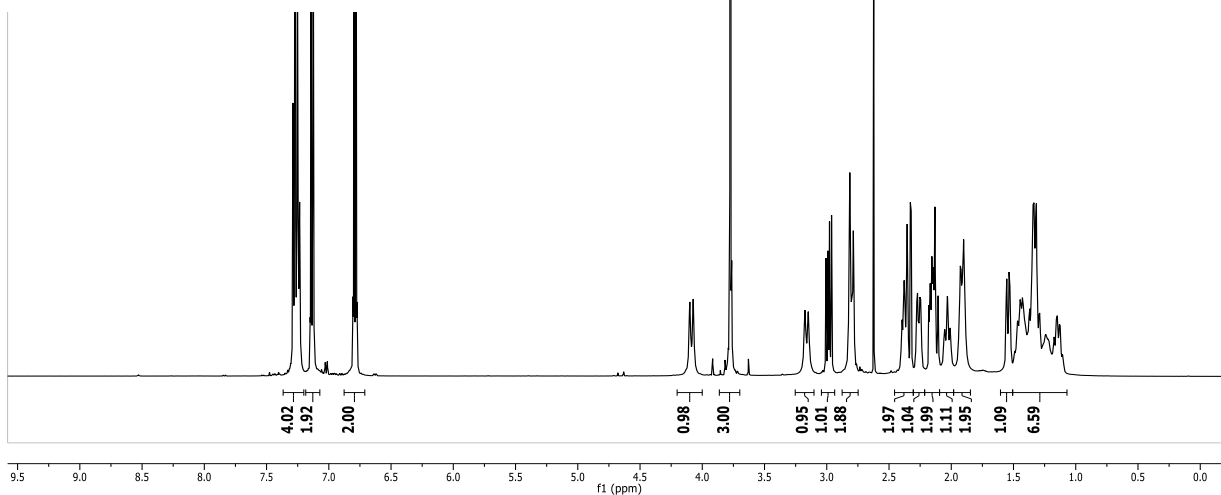

MMC682B3.2.1.1r  
 C13CPD CDCl3 /opt/topspin mmcleod 20

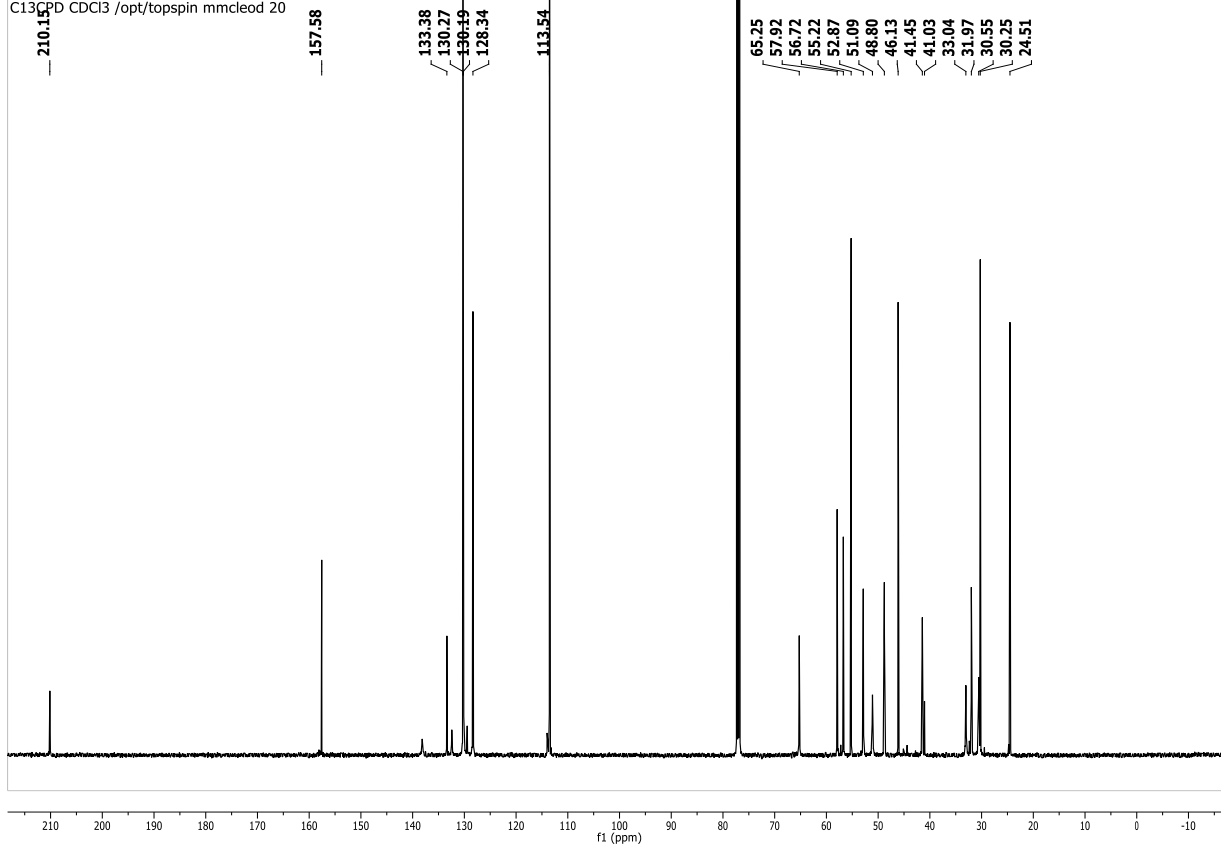

# Sulfonamide **13b**{12}

MMC447D6.1.fid  
PROTON CDCl3 /opt/topspin mmcleod 19

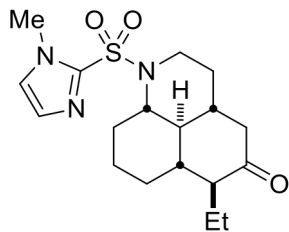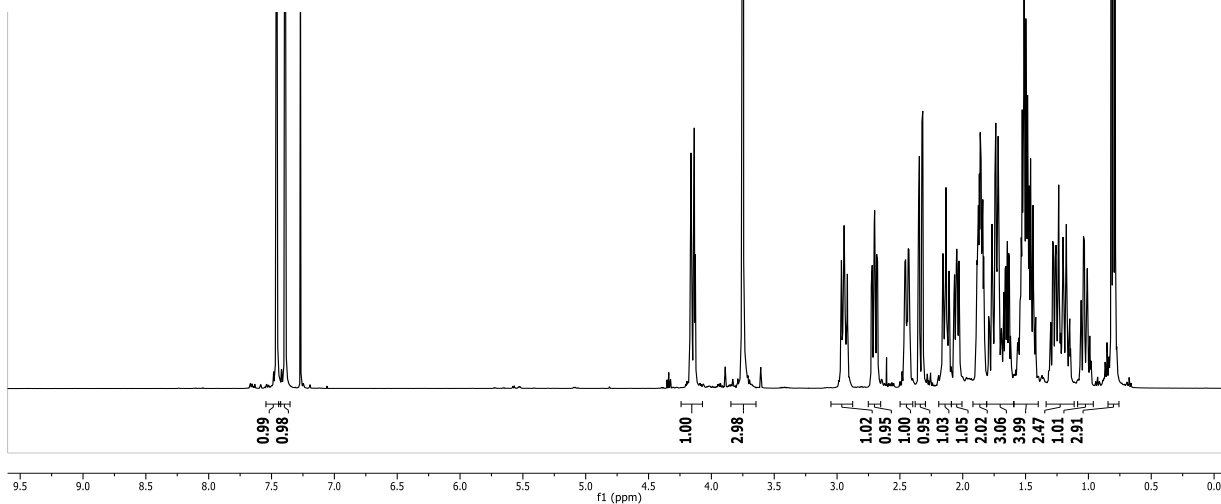

MMC447D6.2.1.1r  
C13CPD CDCl3 /opt/topspin mmcleod 19

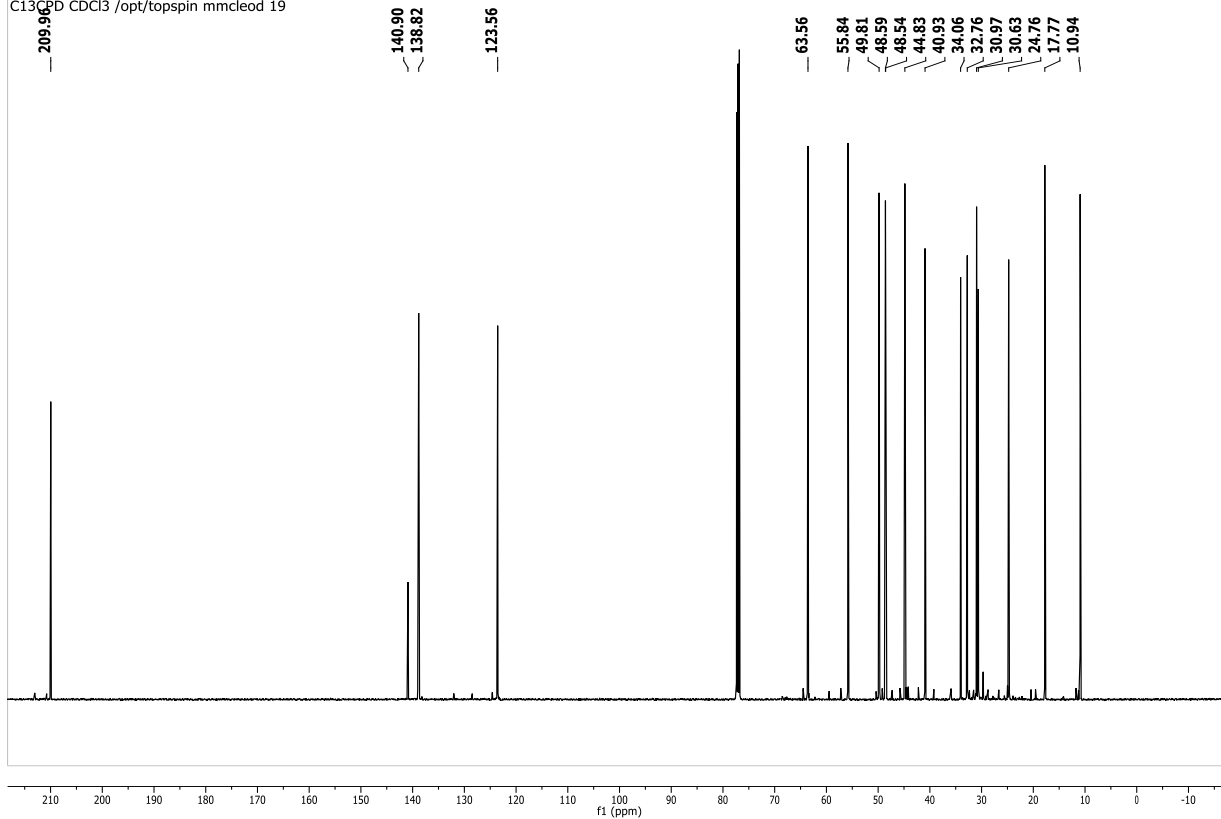

# Sulfonamide **13b**{11}

MMC447D5.1.fid  
 PROTON CDCl3 /opt/topspin mmcleod 18

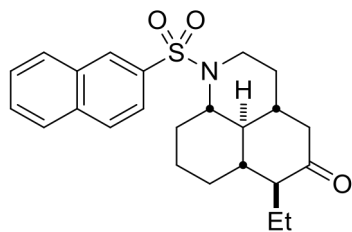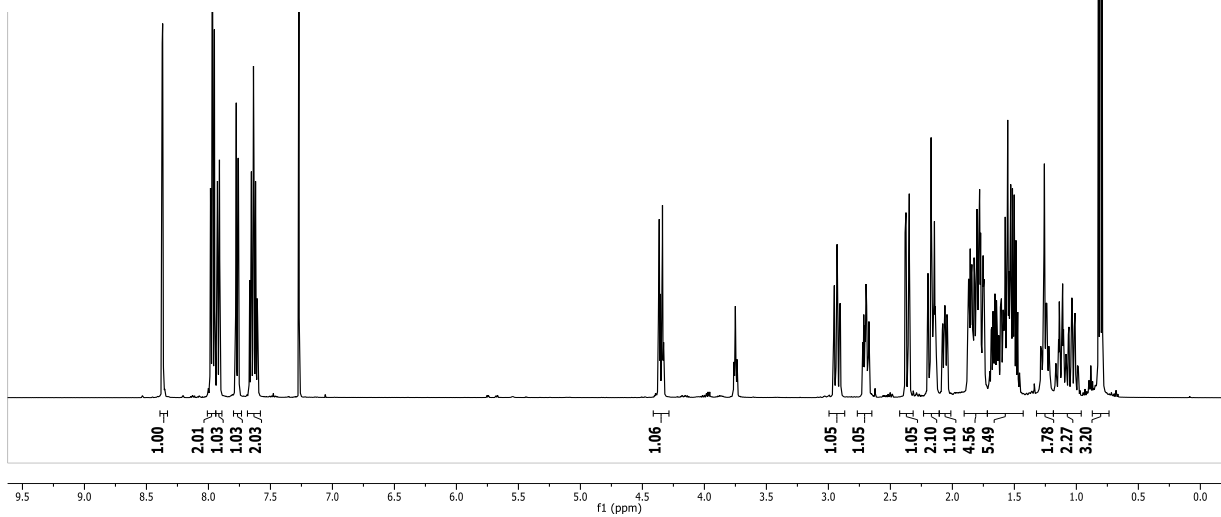

MMC447D5.2.1.1r  
 C13CPD CDCl3 /opt/topspin mmcleod 18

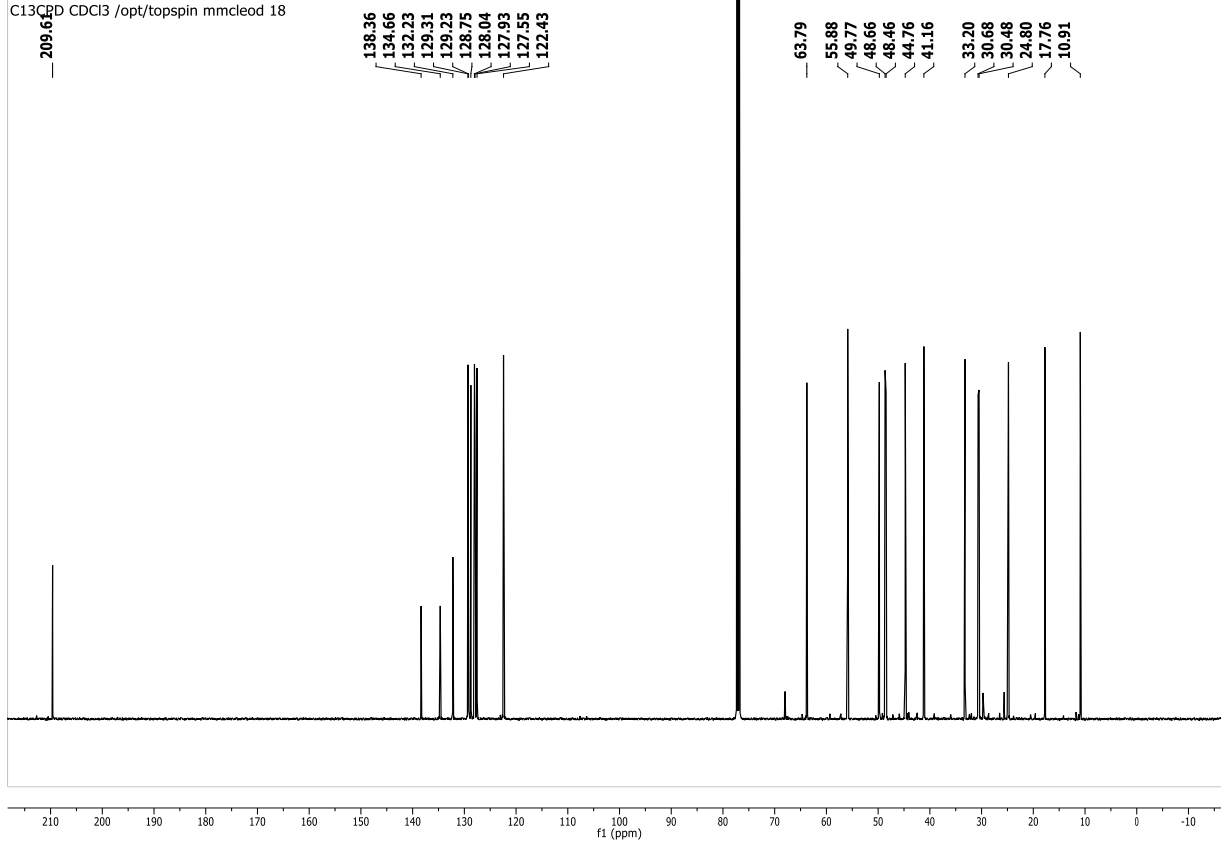

# Sulfonamide **13c**{3}

MMC493C3.1.fid  
PROTON CDCl<sub>3</sub> /opt/topspin mmcleod 17

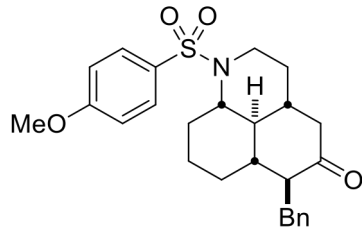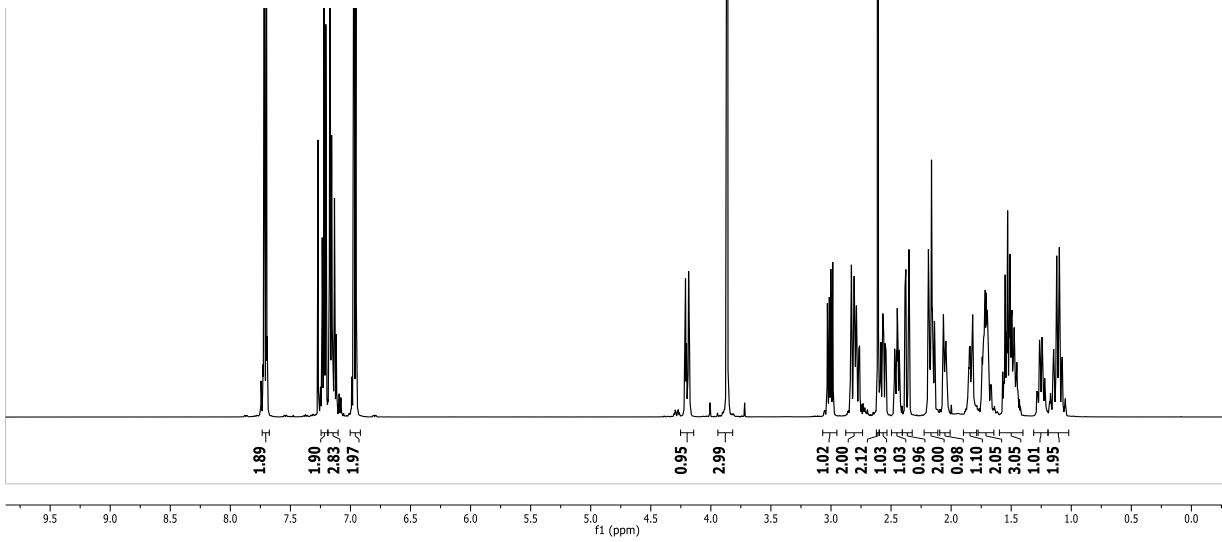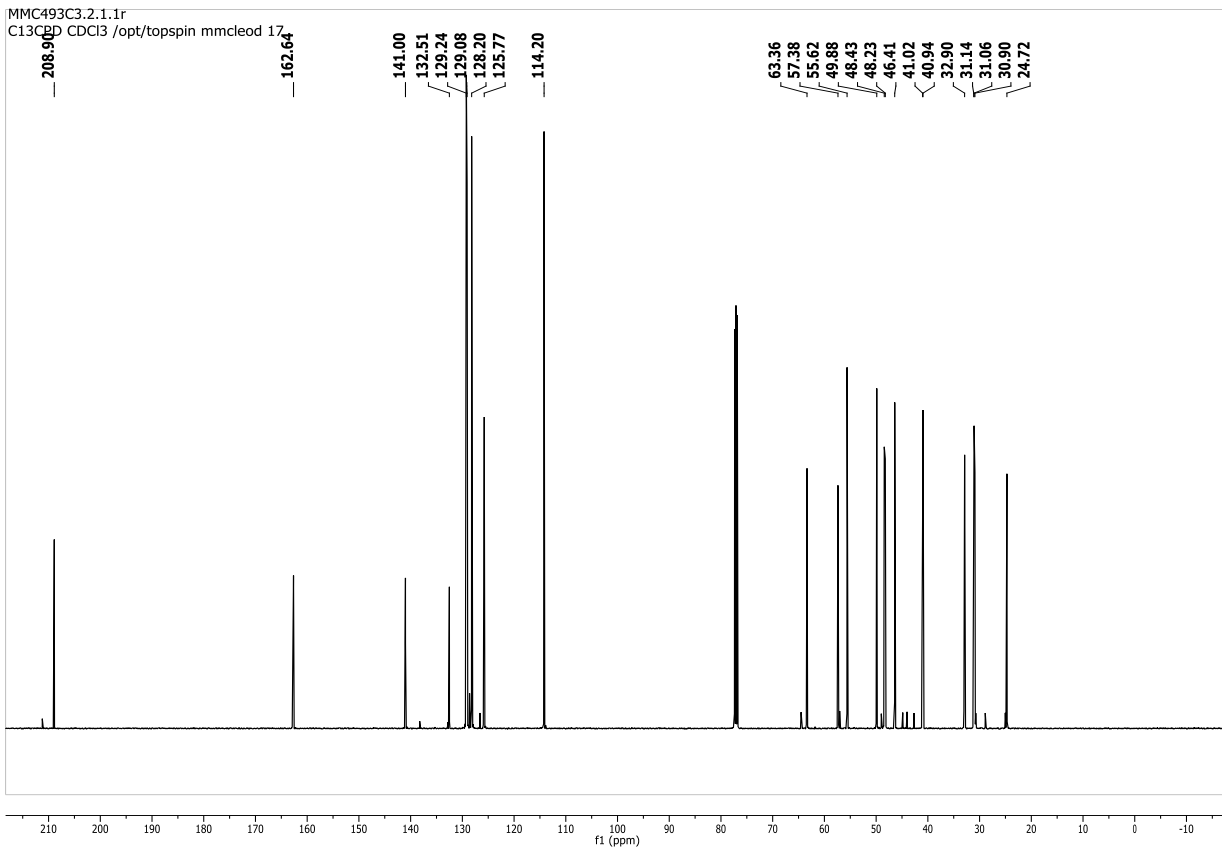

# Sulfonamide **13c**{5}

MMC493C5.1.fid  
PROTON CDCl3 /opt/topspin mmcleod 16

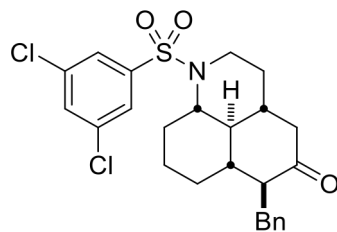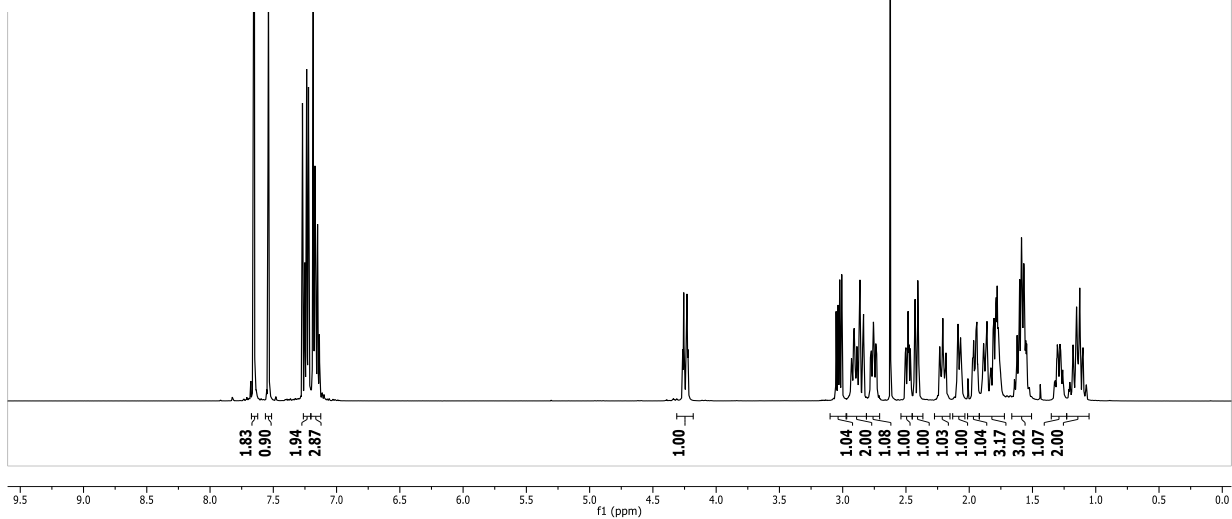

MMC493C5.2.1.1r  
C13CPD CDCl3 /opt/topspin mmcleod 16

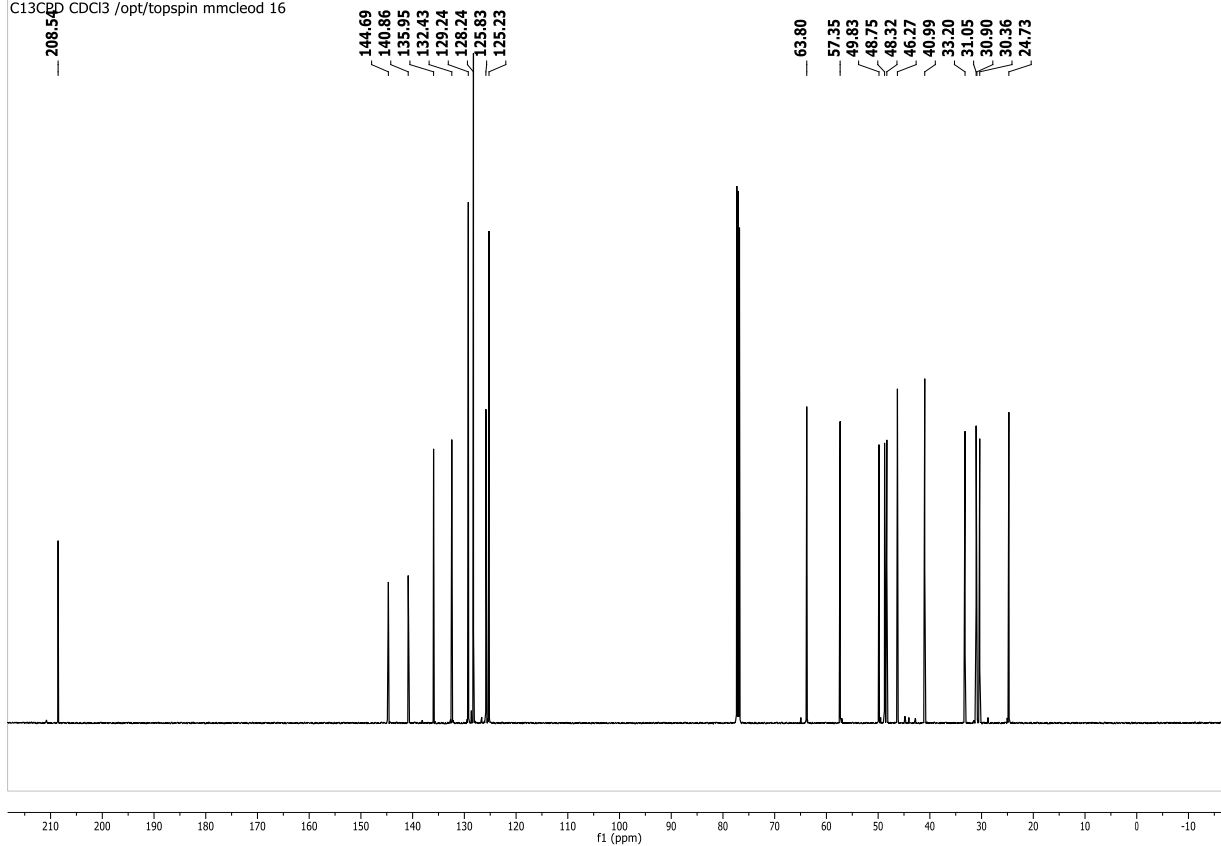

# Sulfonamide **13d**{2}

MMC684C3.1.fid  
PROTON CDCl3 /opt/topspin mmcleod 15

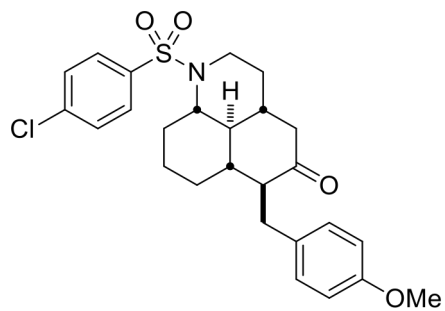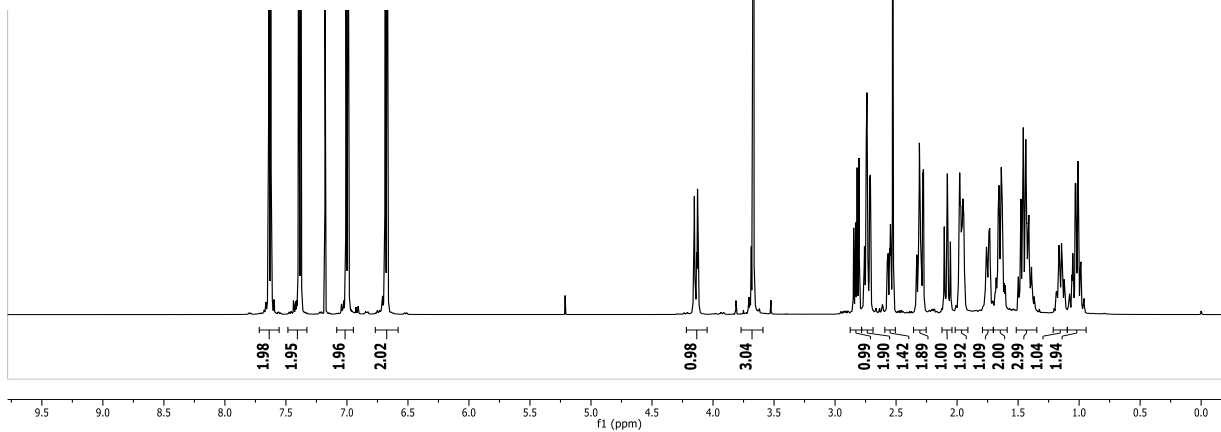

MMC684C3.2.1.1r  
C13CPD CDCl3 /opt/topspin mmcleod 15

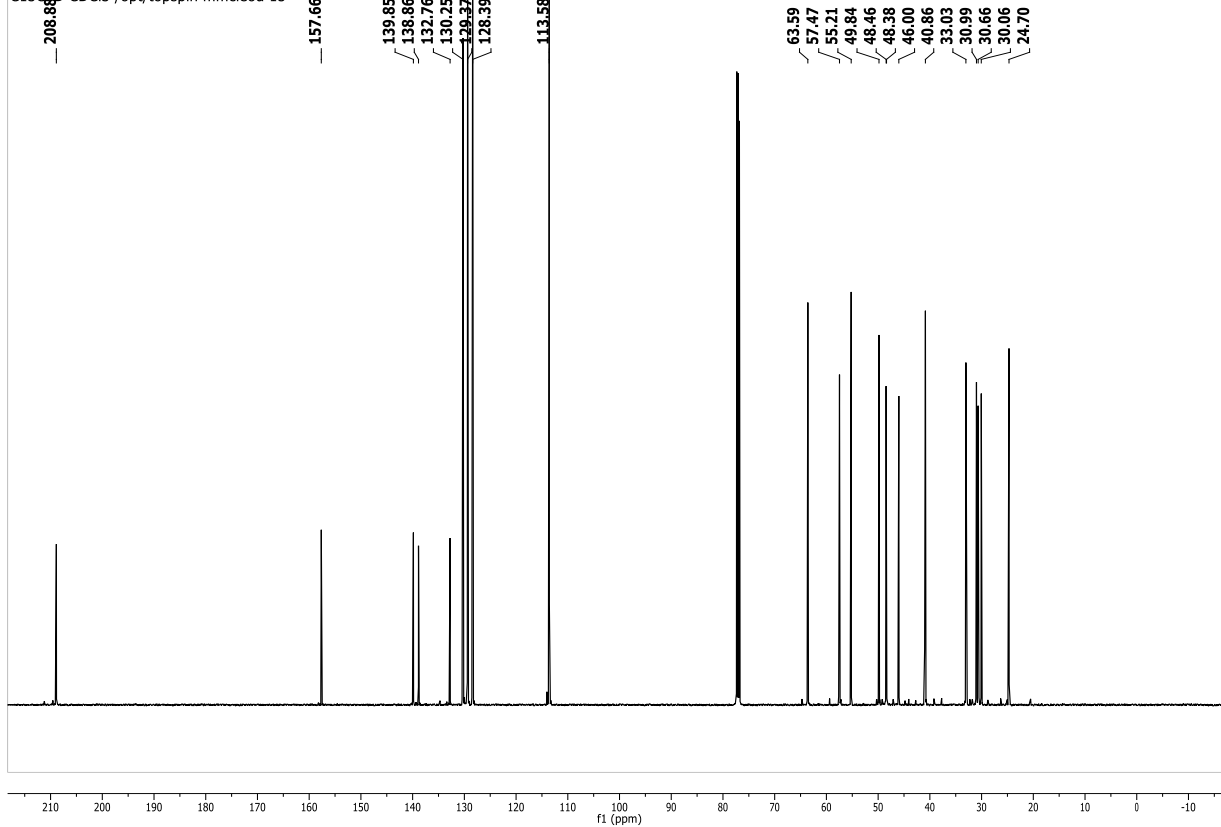

# Amide 11d{7}

MMC683A4.1.1.1r  
PROTON CDCl3 /opt/topspin mmcleod 14

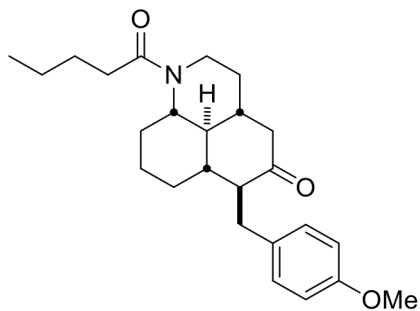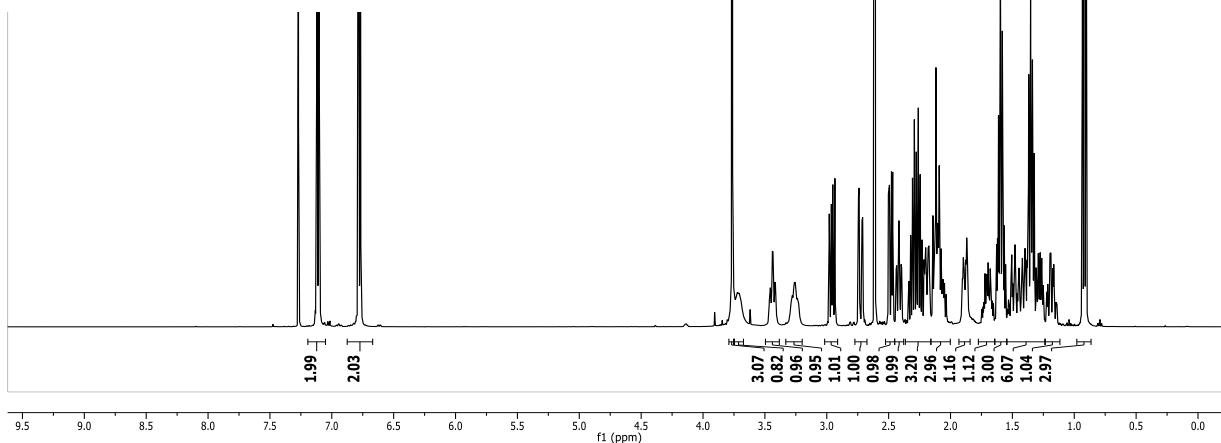

MMC683A4.2.1.1r  
C13CPD CDCl3 /opt/topspin mmcleod 14

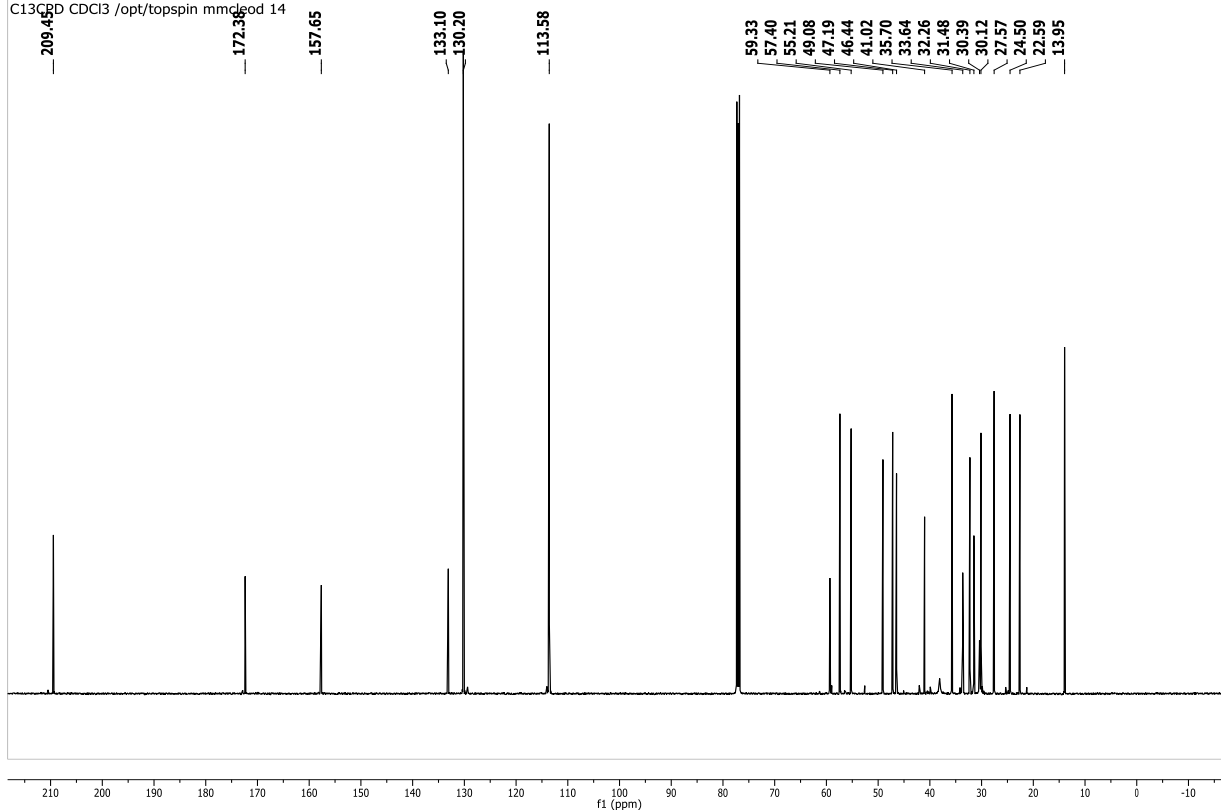



# Amide **11b**{1}

MMC448A1.1.fid

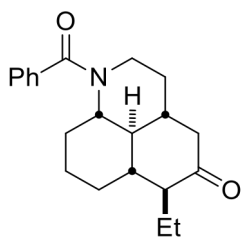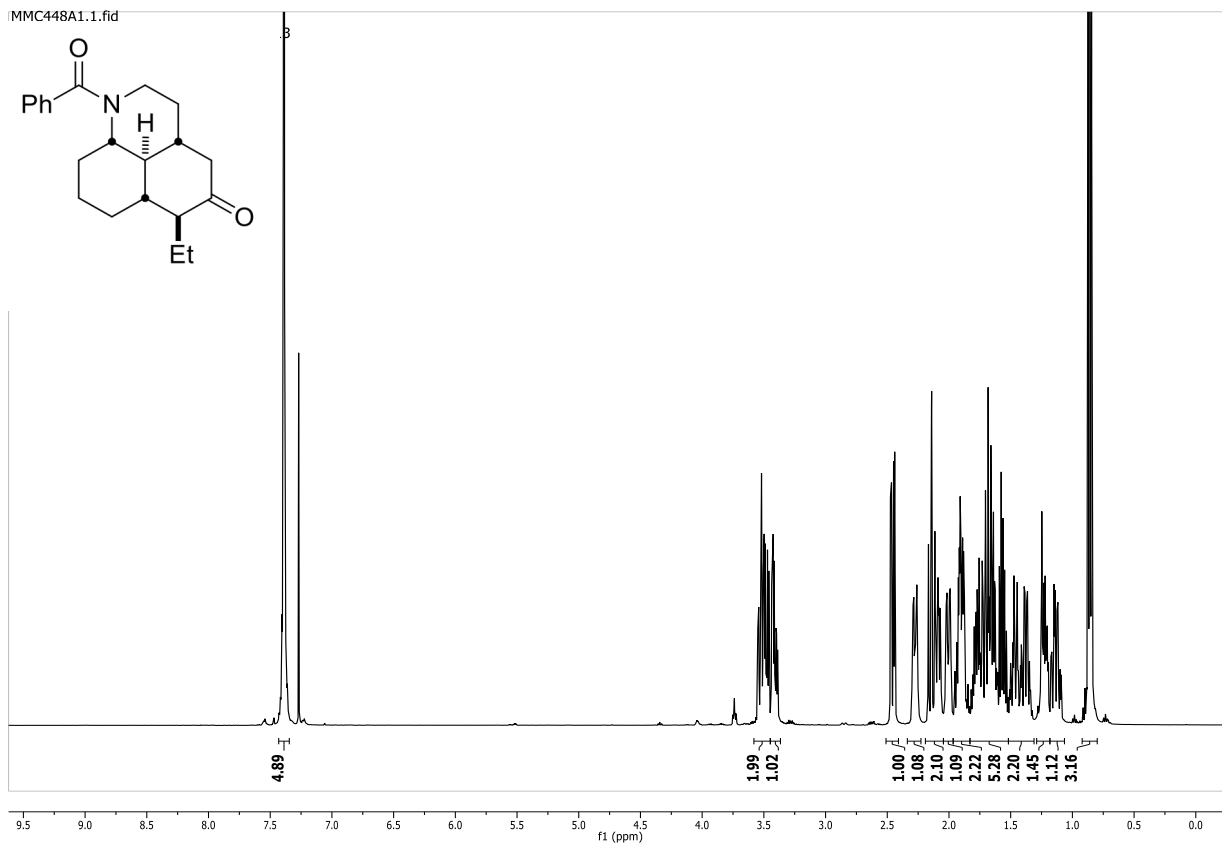

MMC448A1.2.fid

C13CPD CDCl3 /opt/topspin mmclod 13

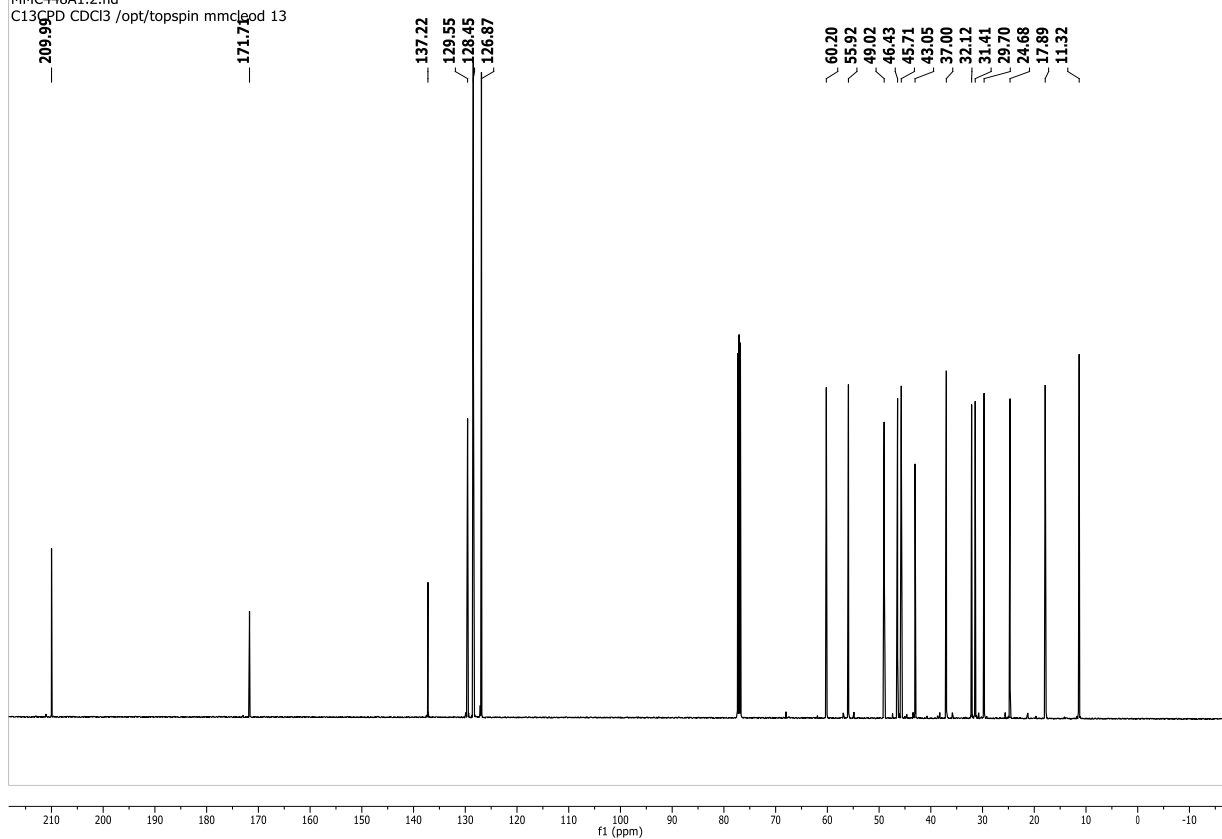

# Amide **11b**{4}

MMC448A4.1.fid  
PROTON CDCl3 /opt/topspin mmcleod 12

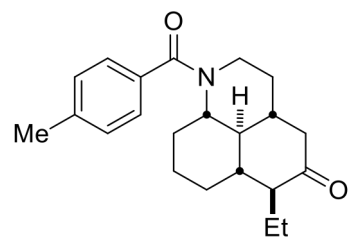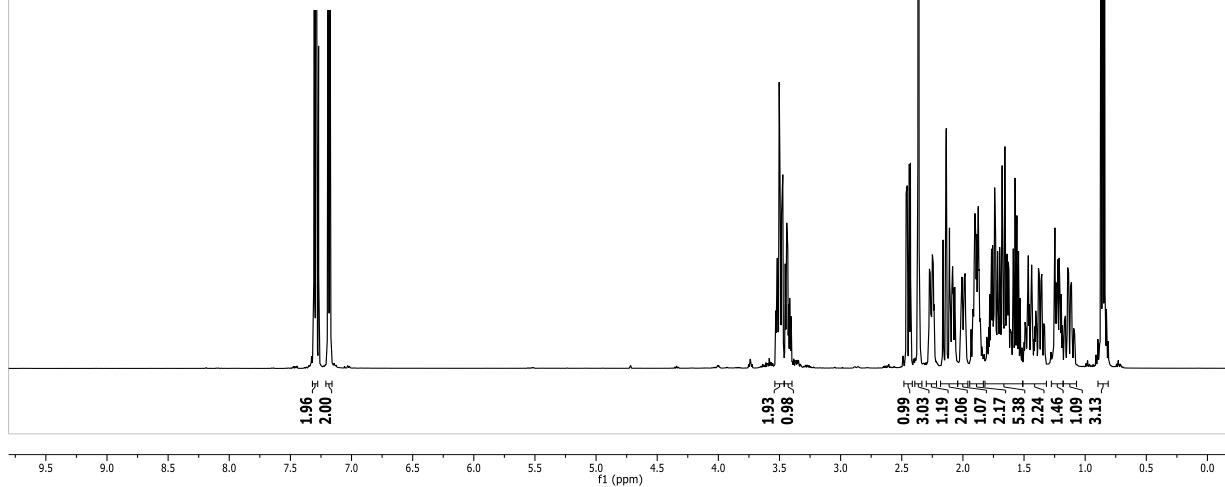

MMC448A4.2.1.1r  
C13CPD CDCl3 /opt/topspin mmcleod 12

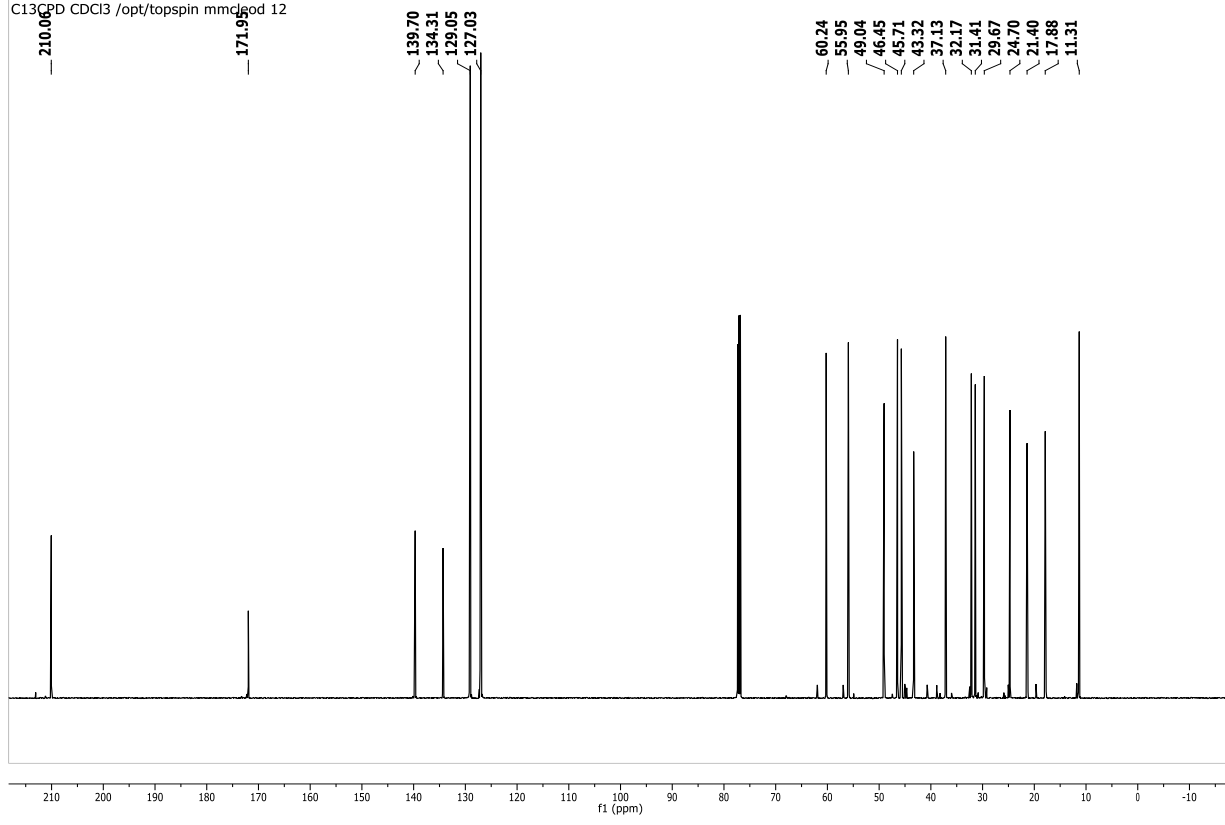

# Amide **11c{8}**

MMC492B2.1.fid  
PROTON CDCl<sub>3</sub> /opt/topspin mmcleod 11

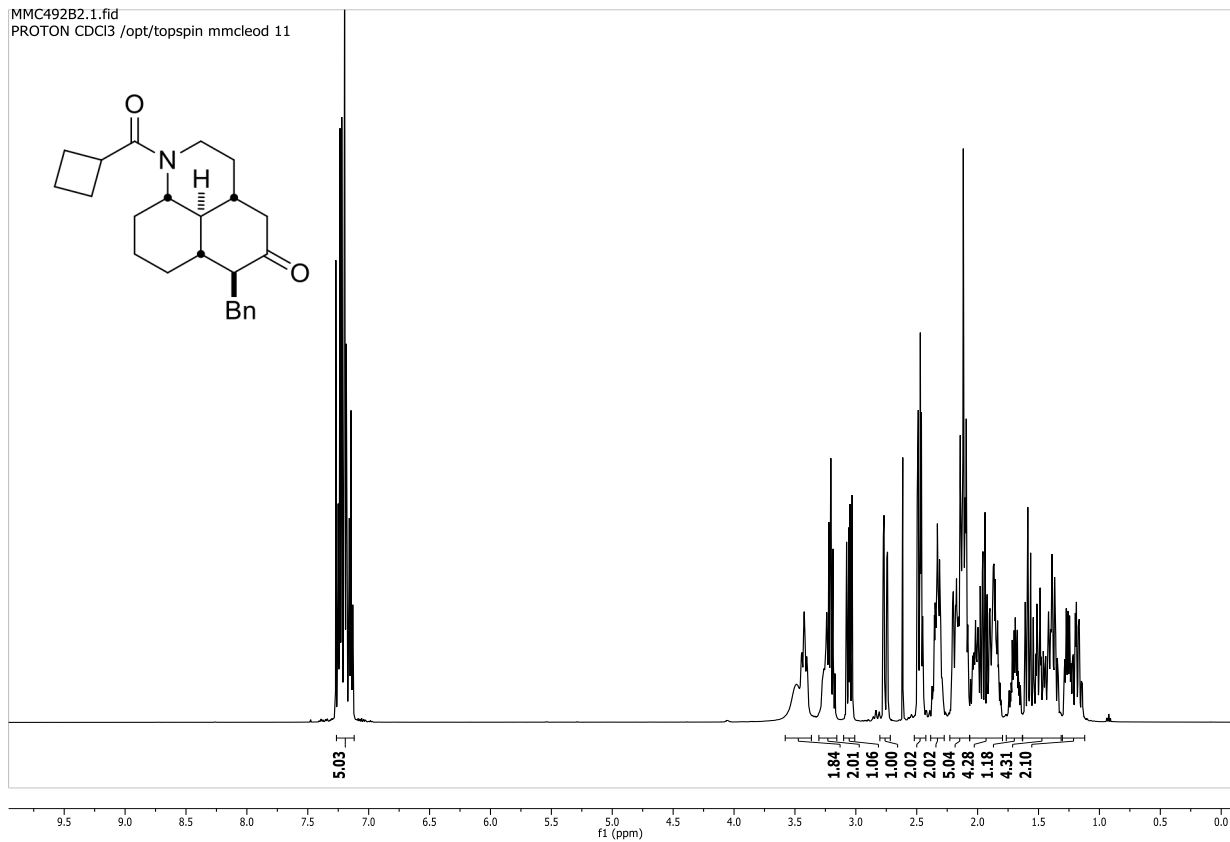

MMC492B2.2.1.1r  
C13CPD CDCl<sub>3</sub> /opt/topspin mmcleod 11

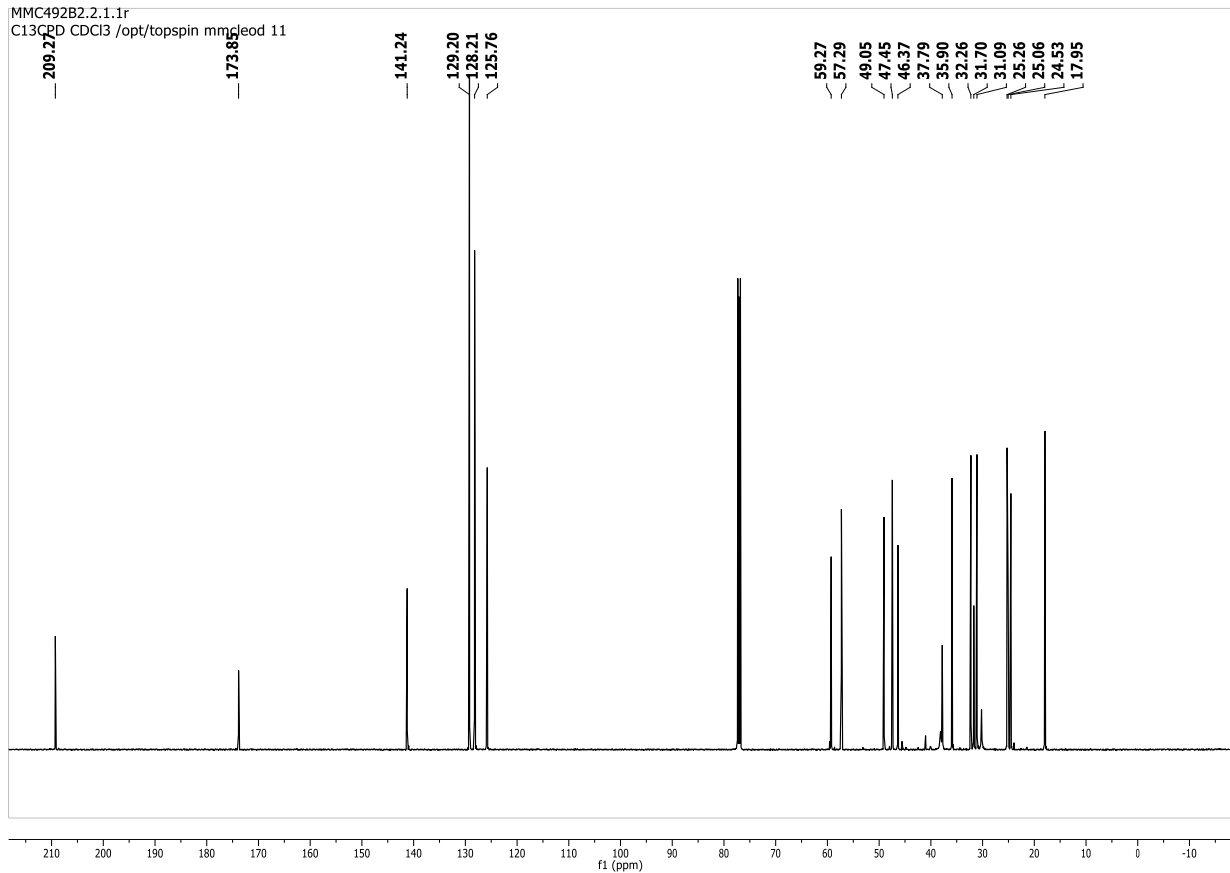

# Amide **11c{10}**

MMC492B4.1.fid  
 PROTON CDCl3 /opt/topspin mmcleod 10

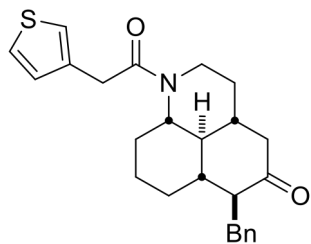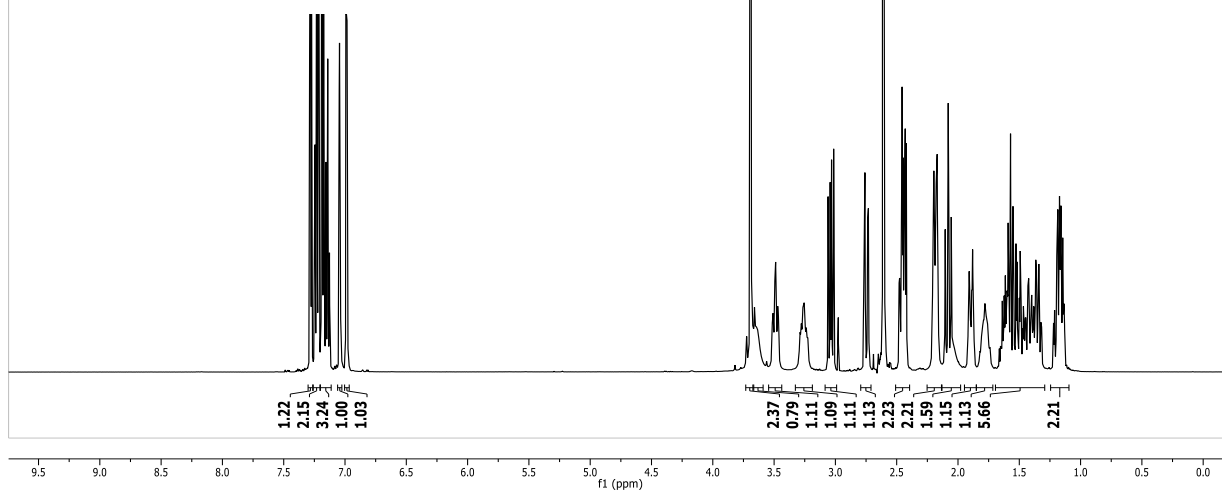

MMC492B4.2.1.1r  
 C13GSD CDCl3 /opt/topspin mmcleod 10

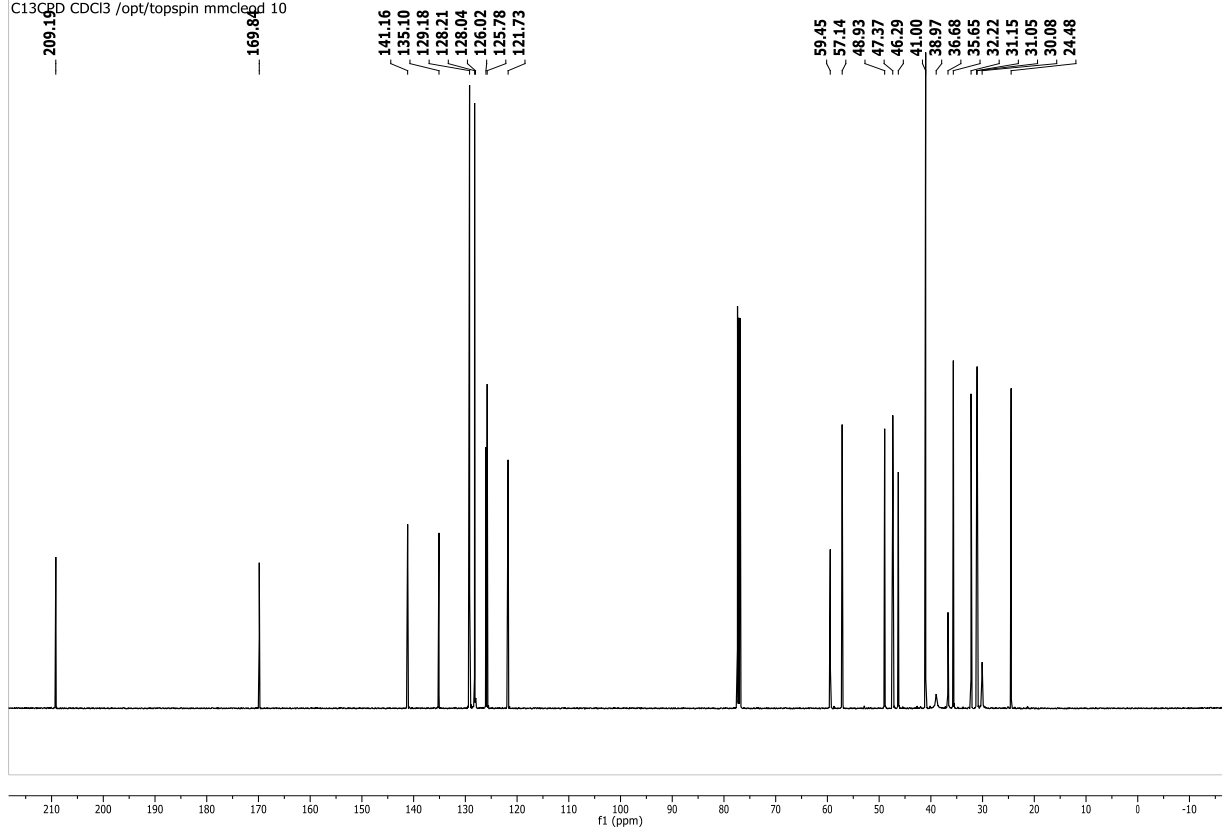

## 7. References

1. Frankowski, K. J.; Neuenswander, B.; Aube, J. *J. Comb. Chem.* **2008**, *10*, 721-725.
2. Xu, Y.; Mayhugh, D.; Saeed, A.; Wang, X.; Thompson, R. C.; Dominianni, S. J.; Kauffman, R. F.; Singh, J.; Bean, J. S.; Bensch, W. R.; Barr, R. J.; Osborne, J.; Montrose-Rafizadeh, C.; Zink, R. W.; Yumibe, N. P.; Huang, N.; Luffer-Atlas, D.; Rungta, D.; Maise, D. E.; Mantlo, N. B. *J. Med. Chem.* **2003**, *46*, 5121-5124.
3. Boyer, J. H. *J. Am. Chem. Soc.* **1951**, *73*, 5248-5252.
4. Kopp, F.; Stratton, C. F.; Akella, L. B.; Tan, D. S. *Nat. Chem. Biol.* **2012**, *8*, 358-365.
